# Supplementary material for: Efficient convergent synthesis of 1,3-diazepinone nucleosides by ring-closing metathesis and direct glycosylation
Source: PubMed Central journal article supplement — RSC Adv. 2024 Nov 20;14(50):37216–26. doi: 10.1039/d4ra07318e (PMC11578044; doi:10.1039/d4ra07318e), 2024-11-20
Supplement: RA-014-D4RA07318E-s001.pdf [file RA-014-D4RA07318E-s001.pdf]

## Supporting Information

### Efficient Convergent Synthesis of 1,3-Diazepinone Nucleosides by Ring-Closing Metathesis and Direct Glycosylation

Adam K. Hedger,<sup>†,‡</sup> Jonathan Findell,<sup>†,§</sup> Dinesh S. Barak,<sup>†</sup> Celia A. Schiffer,<sup>†</sup> Jonathan K.

Watts,<sup>‡,\*</sup> and Akbar Ali<sup>†,\*</sup>

<sup>†</sup>Department of Biochemistry and Molecular Biotechnology, University of Massachusetts Chan Medical School, Worcester, Massachusetts 01605, United States

<sup>‡</sup>RNA Therapeutics Institute, University of Massachusetts Chan Medical School, Worcester, Massachusetts 01605, United States

<sup>§</sup>Department of Chemistry, School of Chemistry, University of Southampton, Highfield, Southampton, SO17 1BJ, United Kingdom

\*Corresponding Authors

Akbar Ali: [Akbar.Ali@umassmed.edu](mailto:Akbar.Ali@umassmed.edu)

Jonathan K. Watts: [Jonathan.Watts@umassmed.edu](mailto:Jonathan.Watts@umassmed.edu);

#### Table of Contents

|                                                                                         |         |
|-----------------------------------------------------------------------------------------|---------|
| 1) Schemes S1                                                                           | S2–S3   |
| 2) Figures S1–S7                                                                        | S4–S10  |
| 3) Synthesis of compounds <b>3–7</b>                                                    | S11–S14 |
| 4) Synthesis of diazepinone riboside                                                    | S15–S18 |
| 5) Synthesis of compounds <b>15</b> and <b>19</b>                                       | S19–S21 |
| 6) Synthesis of 2'-deoxyribo-diazepinone nucleoside by 2'-deoxygenation                 | S22–S28 |
| 7) Copies of <sup>1</sup> H, <sup>13</sup> C, DEPT-135, and <sup>19</sup> F NMR spectra | S29–S76 |

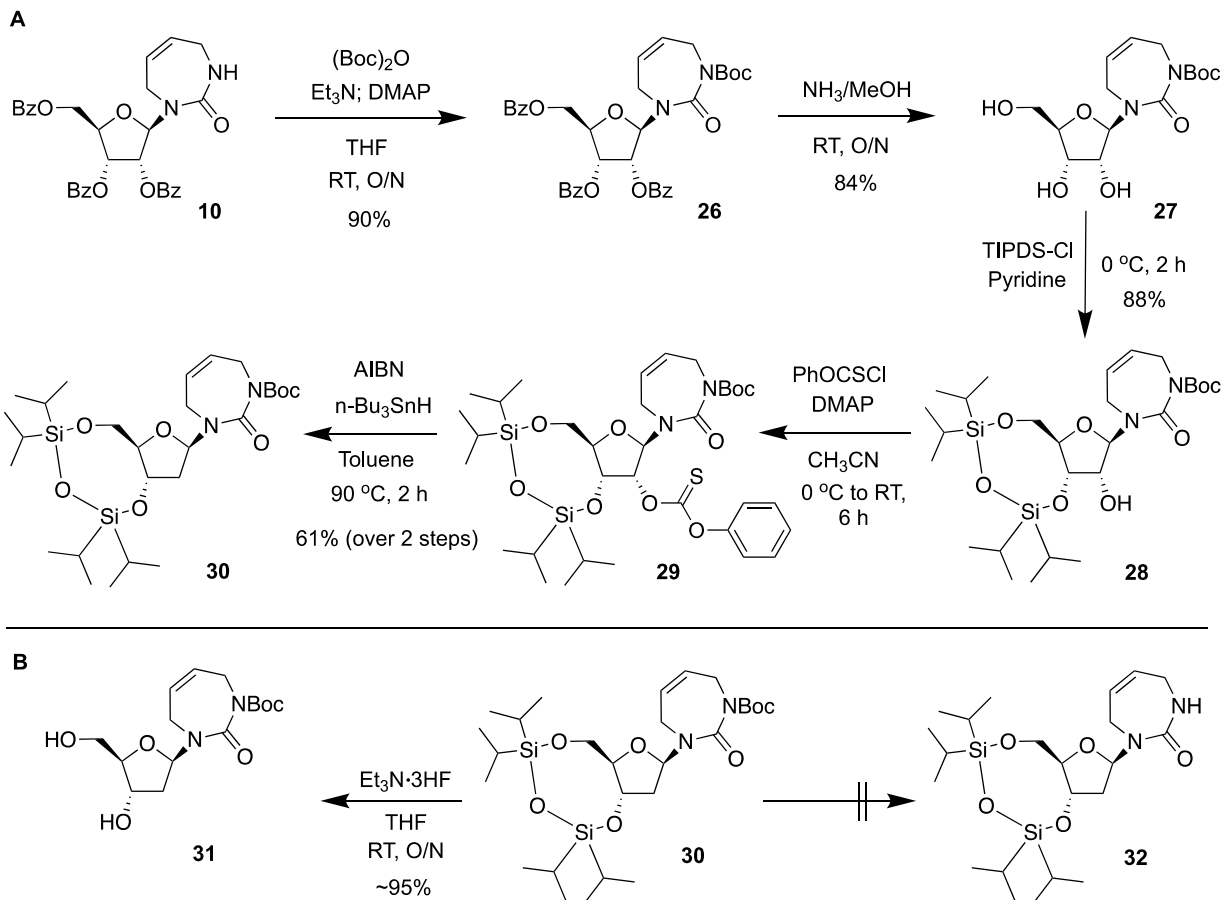

**Scheme S1.** Attempted synthesis of 2'-deoxyribo-diazepinone nucleoside by 2'-deoxygenation.

To attempt 2'-deoxygenation, the urea NH in tribenzoyl-protected riboside **10** was first orthogonally blocked with Boc to give fully protected **26** in high yield. We had observed that protection of this diazepinone NH was critical as it otherwise interfered with the 2'-thioacylation (**28** to **29**). From **26**, methanolic ammonia was used to remove the benzoyl protection to furnish *N*-Boc-protected diazepinone riboside **27**, which was selectively 5'- and 3'-TIPDS-protected to provide silyl derivative **28**. This was then reacted with phenyl chlorothionoformate to give the deoxygenation precursor **29**, which was subjected to Barton-McCombie deoxygenation to yield the protected 2'-deoxy-diazepinone nucleoside **30** in 40% yield over two steps. Finally, with the protected nucleoside **30** in hand, we tried to remove the *N*- and *O*- protecting groups. While the

silyl group could be removed in quantitative yield to give **31** with ease, subsequent attempts to remove the *N*-Boc group with mild acidic conditions including Lewis acids gave a mixture of products. The same *N*-Boc deprotection issue occurred when first attempting to remove this group from nucleoside **30** before the TIPDS removal. These problems, along with the long synthetic scheme prompted us to explore an alternative strategy.

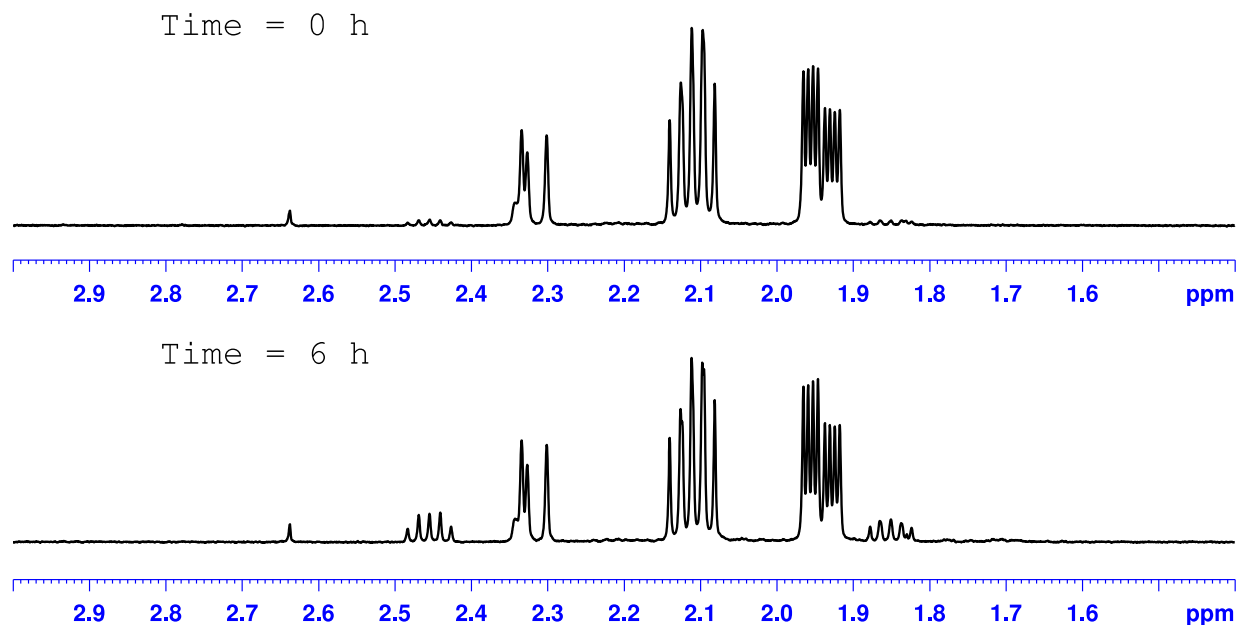

**Figure S1.** Comparison of  $^1\text{H}$  NMR spectra of 2'-deoxyribo-diazepinone nucleoside **16** in  $\text{D}_2\text{O}$ . Top) Fully deprotected nucleoside **16** showing 2'- $\text{CH}_2$  multiplets at 2.15–2.08 and 1.97–1.91 ppm at time zero. Bottom) Same sample after 6 h in  $\text{D}_2\text{O}$  at room temperature showing additional 2'- $\text{CH}_2$  multiplets forming at 2.49–2.42 and 1.88–1.82 ppm.

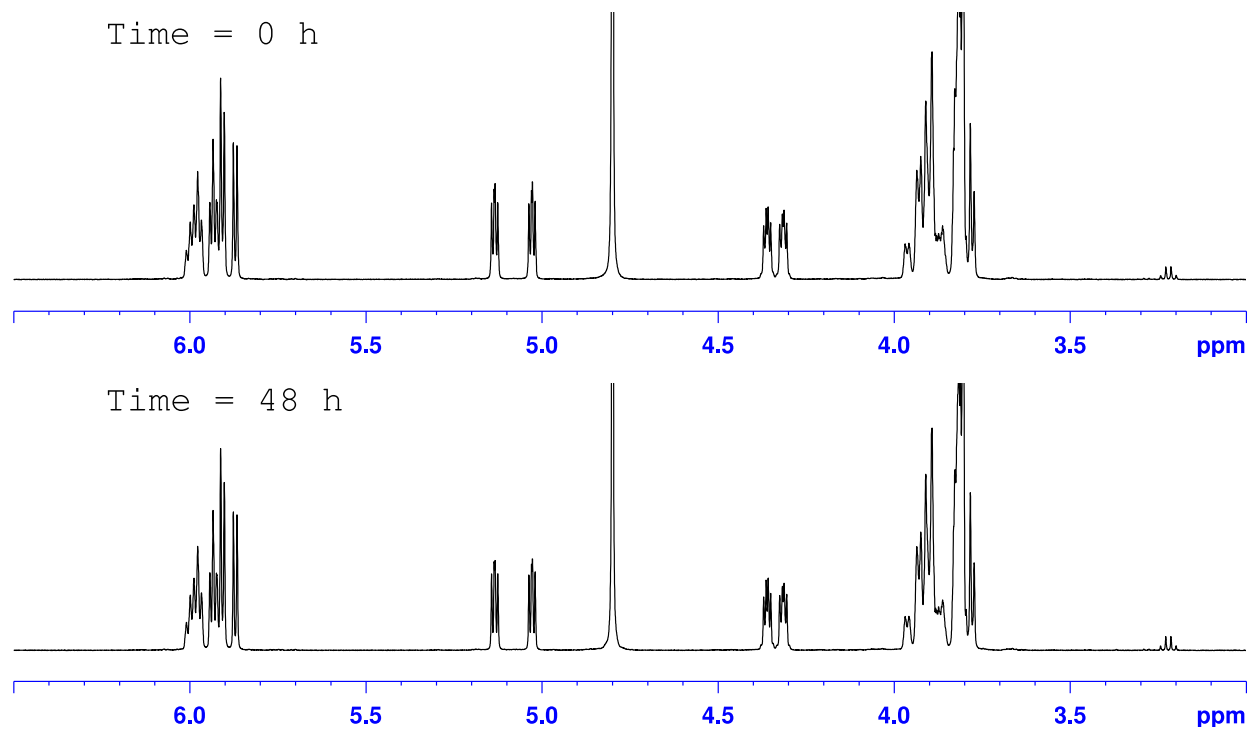

**Figure S2.** Comparison of  $^1\text{H}$  NMR spectra of 2'-fluoroarabino-diazepinone nucleoside **21** in  $\text{D}_2\text{O}$ : Top) Fully deprotected nucleoside **21** at time zero. Bottom) Same sample after 48 h in  $\text{D}_2\text{O}$  at room temperature showing no change in spectra.

Time = 0 h

Time = 48 h

**Figure S3.** Comparison of  $^1\text{H}$  NMR spectra of 2'-deoxy-2',2'-difluoro-diazepinone nucleoside **23** in  $\text{D}_2\text{O}$ : Top) Fully deprotected nucleoside **23** at time zero. Bottom) Same sample after 48 h in  $\text{D}_2\text{O}$  at room temperature showing no change in spectra.

2D NOESY NMR crosspeaks were used to confirm  $\beta$  and  $\alpha$  anomer assignment after glycosylation:

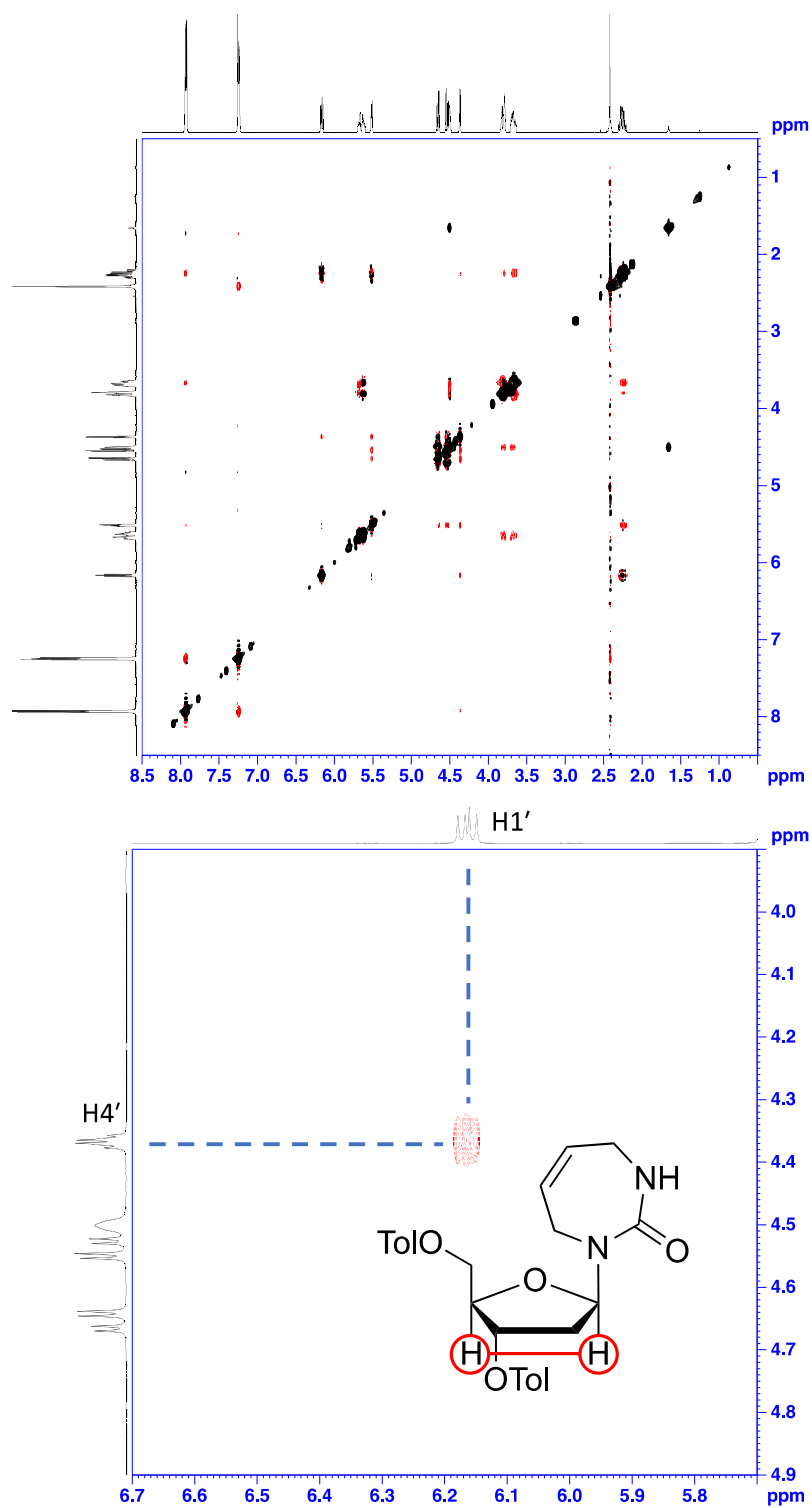

Figure S4. 2D NOESY NMR spectra for nucleoside 14 ( $\beta$ -anomer). Top: Whole spectrum, Bottom: Zoomed region showing through space interaction of anomeric proton with H4'.

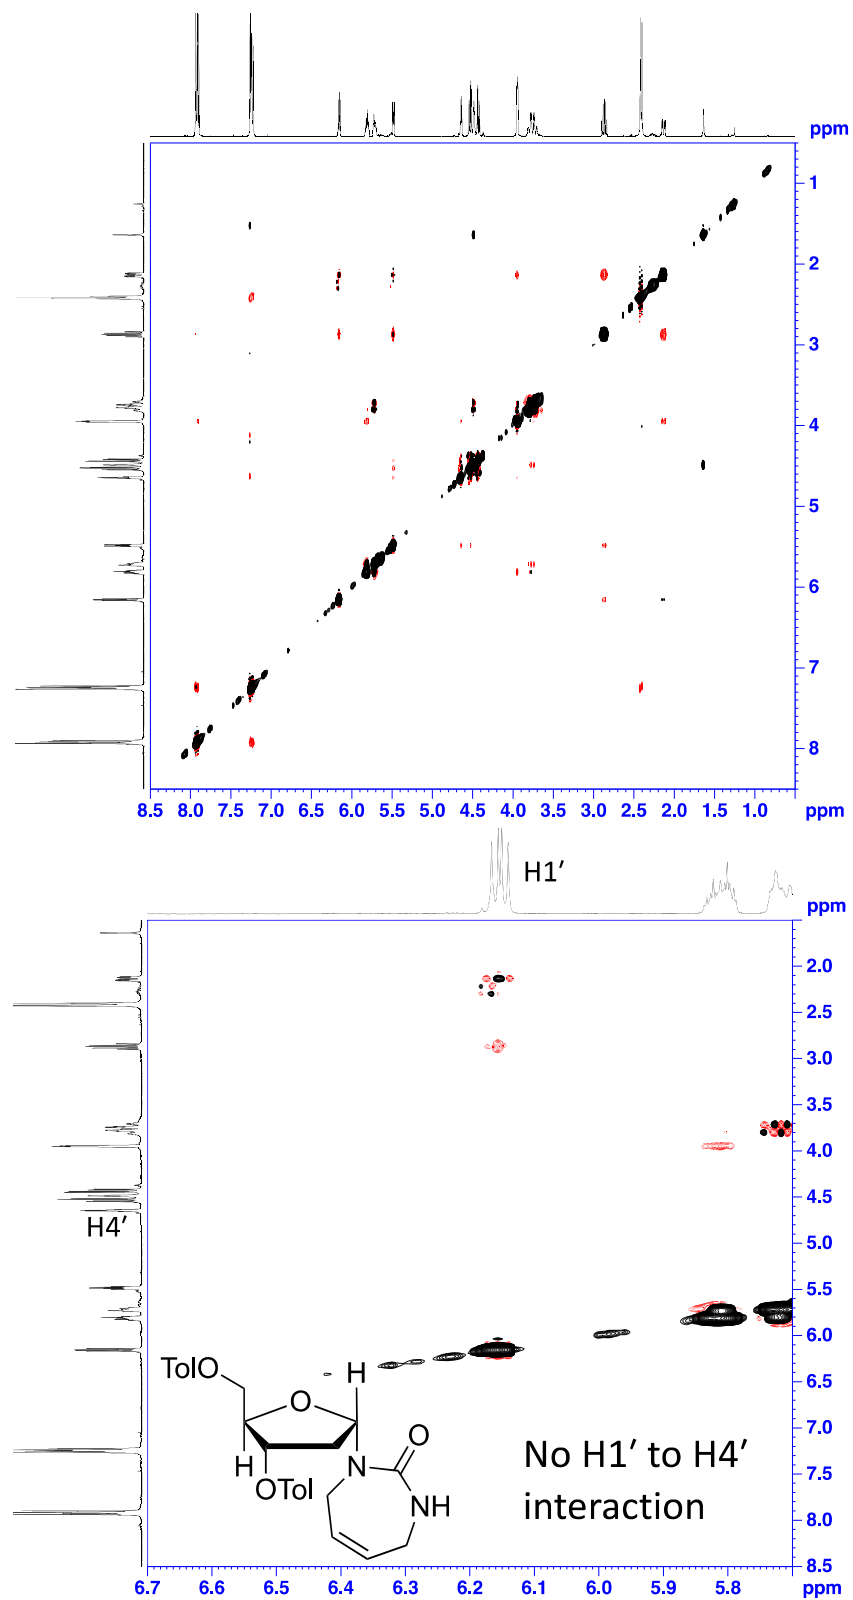

**Figure S5. 2D NOESY NMR spectra for nucleoside 15 ( $\alpha$ -anomer).** Top: Whole spectrum, Bottom: Zoomed region showing no through space interaction between anomeric proton and H4'.



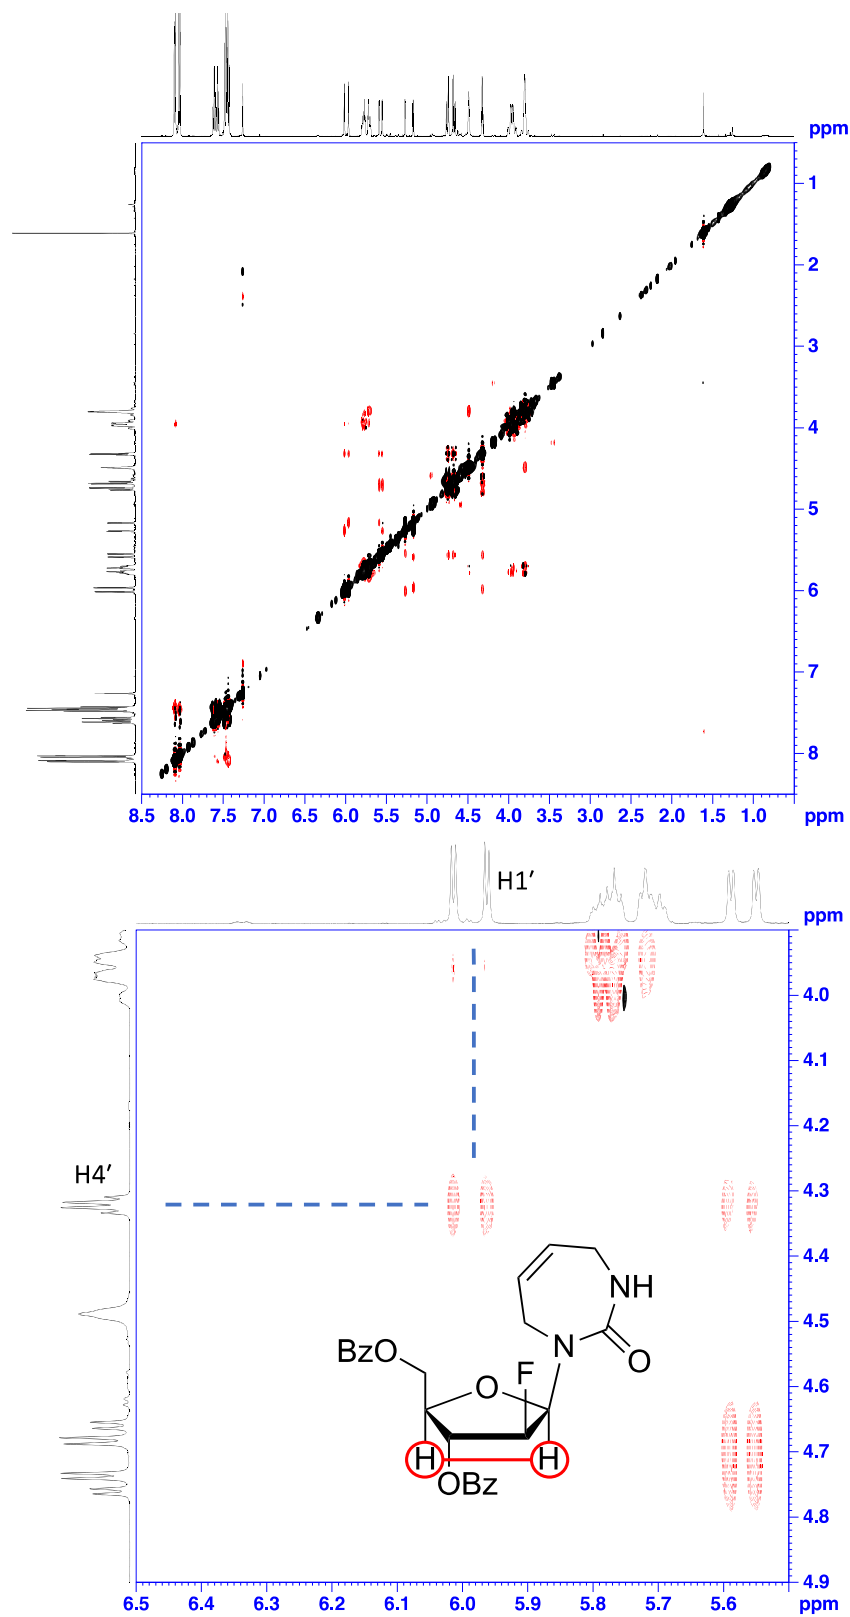

**Figure S6. 2D NOESY NMR spectra for nucleoside 20 (β-anomer).** Top: Whole spectrum, Bottom: Zoomed region showing through space interaction of anomeric proton with H4'.

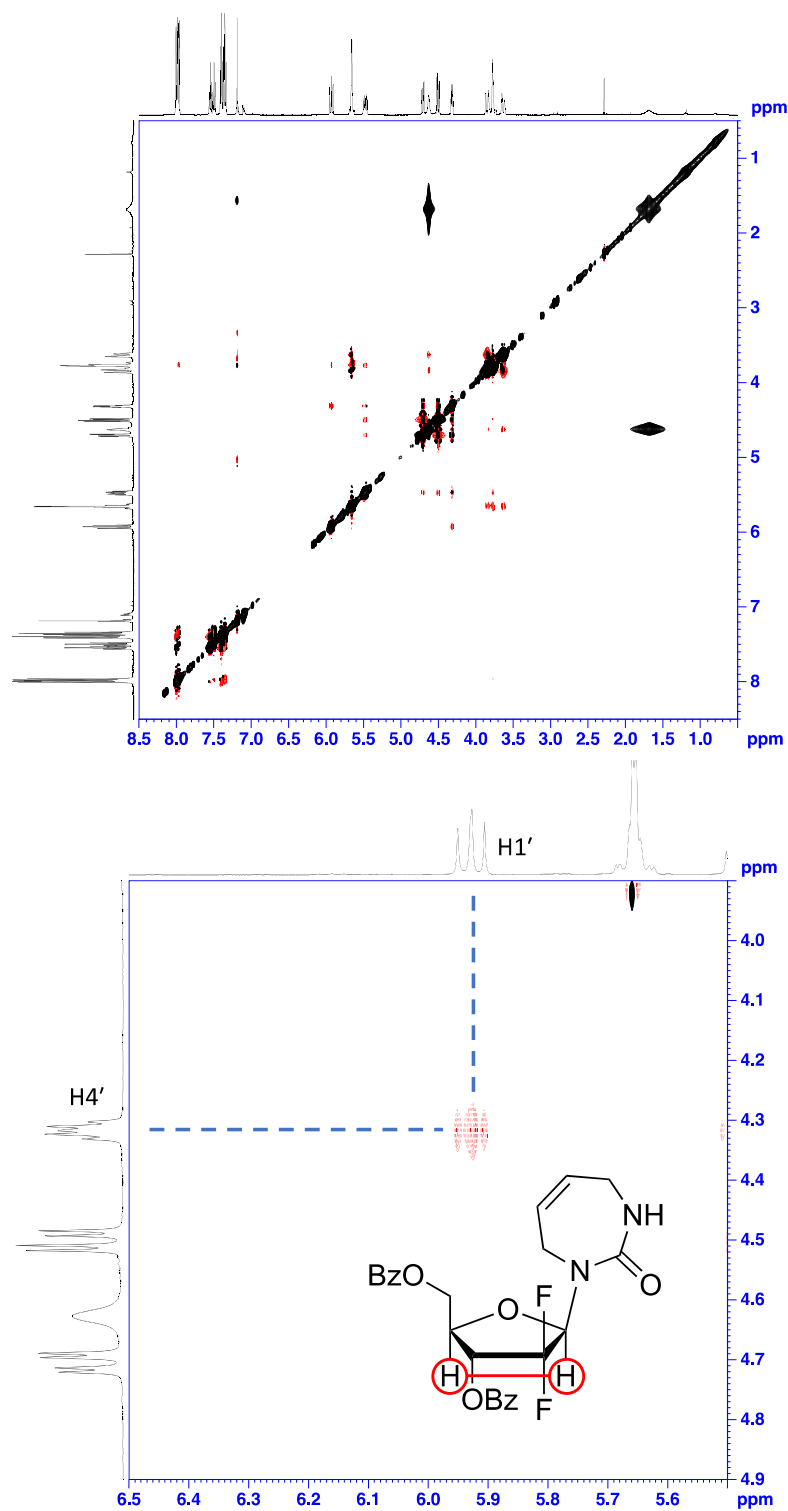

**Figure S7. 2D NOESY NMR spectra for nucleoside 23 (β-anomer).** Top: Whole spectrum, Bottom: Zoomed region showing through space interaction of anomeric proton with H4'.

## General procedure for RCM reactions with different catalysts

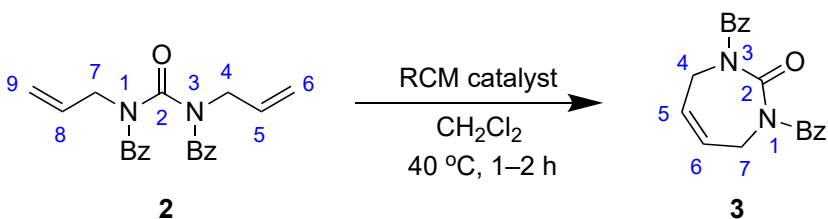

Compound **2** (0.42 g, 1.2 mmol) was dissolved in anhydrous  $\text{CH}_2\text{Cl}_2$  (200 mL) and this solution degassed using  $10 \times$  fill cycles of vacuum and argon. The solution was then heated to  $40\text{ }^\circ\text{C}$  under an argon atmosphere. After 15 min, RCM catalyst (0.12 mmol, 0.10 eq) was then added to the solution. The solution was stirred for 1 h or until TLC indicated reaction had reached completion (the reaction with the Grubbs first-generation catalyst was slower and took 2 h to complete) ( $R_f$  starting material = 0.67,  $R_f$  product = 0.51, 25% EtOAc/hexanes, visualized by UV). Solvents were evaporated under reduced pressure, the residue redissolved in a minimum volume of  $\text{CH}_2\text{Cl}_2$ , and purified by flash chromatography using a silica gel column (SiliaSep, 40 g, gradient elution with  $\text{CH}_2\text{Cl}_2$ ). Product containing fractions were pooled and evaporated in *vacuo* to give the diazepinone derivative as a white solid. TLC:  $R_f$  = 0.50 (25% EtOAc/hexanes).

## RCM and Bz deprotection without intermediate purification

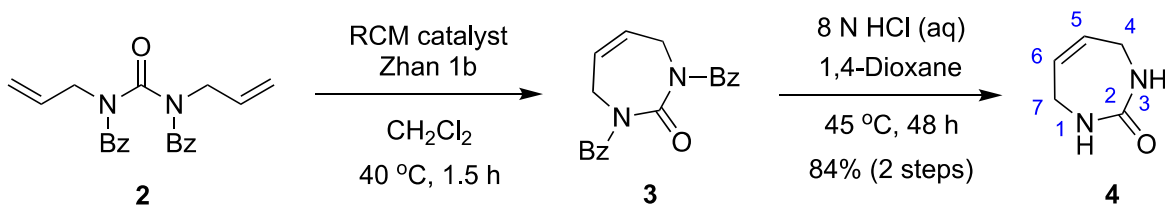

Compound **2** (2.50 g, 7.18 mmol) was dissolved in anhydrous  $\text{CH}_2\text{Cl}_2$  (1.3 L) and solution degassed. The solution was heated to  $40\text{ }^\circ\text{C}$ , and Zhan 1b catalyst (0.053 g, 0.072 mmol, 0.01 eq) was then added to the solution and stirred for 1 h. Upon completion (monitored by TLC), another three additions of compound **2** (2.50 g each) and Zhan 1b catalyst (0.053 g each) were performed

in the same vessel, as described previously. The solvent was evaporated to provide 9.67 g of brown solid.

Without purification, crude compound **3** (9.67 g) was dissolved in 1,4-dioxane (60 mL) and cooled in an ice bath. Aqueous 8 N HCl (30 mL) was slowly added whilst stirring. The mixture was warmed to room temperature before heating at 45 °C for 48 h. The reaction mixture was cooled to 0 °C and neutralised to pH 7 with aqueous 4 N NaOH (~80 mL). The solvents were evaporated *in vacuo* and the residue was dried under high vacuum overnight. The dried product was ground using a pestle and mortar and triturated with 10% MeOH/CH<sub>2</sub>Cl<sub>2</sub>, filtering and repeating until TLC ( $R_f = 0.60$ , 10% MeOH/CH<sub>2</sub>Cl<sub>2</sub>, visualised by ninhydrin stain) showed no more product eluting. The solution was passed through a short silica gel bed, eluting with 10% MeOH/CH<sub>2</sub>Cl<sub>2</sub> until TLC (same conditions and visualisation) showed no further product coming out. The combined fractions were evaporated *in vacuo* to give a pale-yellow solid. Recrystallization from MeOH gave compound **4** as a white crystalline solid. First crop: 2.01 g. Second crop: 0.54 g. The filtrate was concentrated *in vacuo*, and the residue was purified by flash column chromatography, using elution gradient of 10–20% MeOH/CH<sub>2</sub>Cl<sub>2</sub>. Fractions were pooled based on TLC and evaporated. The residue was recrystallised from MeOH to give a third crop: 0.15 g. Total yield over two steps: 2.70 g, 84%.

**(Z)-N-(4-Ureidobut-2-en-1-yl)benzamide (5).**

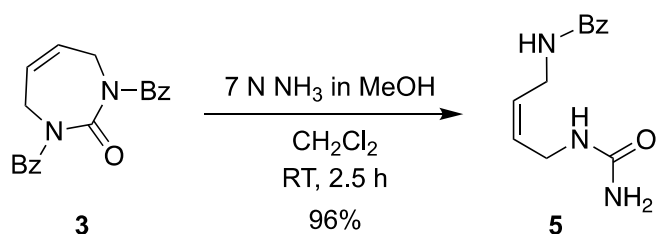

Benzoyl-protected diazepinone **3** (0.50 g, 1.56 mmol) was dissolved in a small amount of anhydrous dichloromethane (2 mL), this solution was then charged with 7 N methanolic ammonia (50 mL) in a sealed glass vessel and stirred at room temperature. TLC indicated the reaction was complete within 2.5 h by consumption of starting material, and formation of a new lower spot (stained by ninhydrin stain). Solvents were evaporated under reduced pressure, the residue redissolved in a minimum volume of CH<sub>2</sub>Cl<sub>2</sub>, and purified by flash chromatography using a silica gel column (SiliaSep, 12 g, gradient elution with 0–10 % MeOH/CH<sub>2</sub>Cl<sub>2</sub>). Product containing fractions were pooled and evaporated in *vacuo* to give the product (0.35 g, 96%) as a white solid, which was identified as the ring-opened urea compound **5**. TLC: R<sub>f</sub> = 0.42 (10% MeOH/CH<sub>2</sub>Cl<sub>2</sub>).

<sup>1</sup>H NMR (500 MHz, DMSO-*d*<sub>6</sub>): δ 8.65 (t, *J* = 5.4 Hz, 1H), 7.86–7.84 (m, 2H), 7.53–7.50 (m, 1H), 7.47–7.44 (m, 2H), 6.04 (t, *J* = 5.6 Hz, 1H), 5.52–5.42 (m, 4H), 3.94 (t, *J* = 5.8 Hz, 2H), 3.72 (t, *J* = 5.8 Hz, 2H) ppm.

<sup>13</sup>C NMR (126 MHz, DMSO-*d*<sub>6</sub>): δ 165.92 (C=O), 158.64 (C=O), 134.40 (C), 131.11 (CH), 130.01 (CH), 128.26 (2 × CH), 127.57 (CH), 127.15 (2 × CH), 36.45 (CH<sub>2</sub>), 36.25 (CH<sub>2</sub>) ppm.

#### Methyl (*Z*)-(4-benzamidobut-2-en-1-yl)carbamate (**6**).

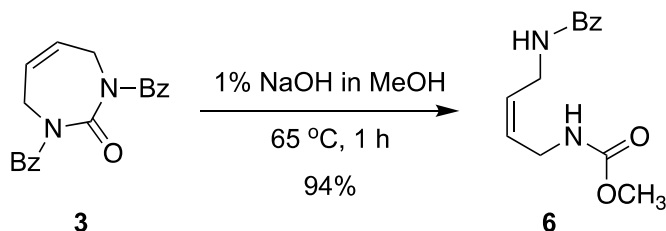

Benzoyl-protected diazepinone **4** (3.42 g, 10.7 mmol) was dissolved in a solution of 1 % NaOH in methanol and refluxed at 65 °C for 1 h. The reaction mixture was cooled to room temperature, neutralized with aqueous 2 N HCl solution, and concentrated under reduced pressure. The solid

residue was triturated with 10 % MeOH/CH<sub>2</sub>Cl<sub>2</sub> and filtered. This was repeated, and combined organic fractions evaporated to dryness. The solid was redissolved in CH<sub>2</sub>Cl<sub>2</sub> and purified by flash column chromatography using a silica gel column (SiliaSep, 40 g, elution with 50–100% EtOAc/CH<sub>2</sub>Cl<sub>2</sub>). Product containing fractions were pooled, dried, and recrystallized from EtOAc to give the product (2.50 g, 94%) as a white solid, which was identified as the ring-opened carbamate compound **6**. TLC: R<sub>f</sub> = 0.45 (50% EtOAc/CH<sub>2</sub>Cl<sub>2</sub>).

**<sup>1</sup>H NMR** (500 MHz, CDCl<sub>3</sub>): δ 7.84 (d, *J* = 7.4 Hz, 2H), 7.49–7.46 (m, 1H), 7.42–7.39 (m, 2H), 7.12 (br s, 1H), 5.70 (q, *J* = 8.4 Hz, 1H), 5.62–5.57 (m, 1H), 5.30 (br s, 1H), 4.13 (t, *J* = 6.5 Hz, 2H), 3.88 (t, *J* = 6.2 Hz, 2H), 3.67 (s, 3H) ppm.

**<sup>13</sup>C NMR** (126 MHz, CDCl<sub>3</sub>): δ 167.42 (C=O), 157.40 (C=O), 134.49 (C), 131.52 (CH), 129.35 (CH), 128.55 (2 × CH), 128.36 (CH), 127.23 (2 × CH), 52.30 (OCH<sub>3</sub>), 37.73 (CH<sub>2</sub>), 36.18 (CH<sub>2</sub>) ppm.

### 1-Benzoyl-1,3,4,7-tetrahydro-2*H*-1,3-diazepin-2-one (**7**).

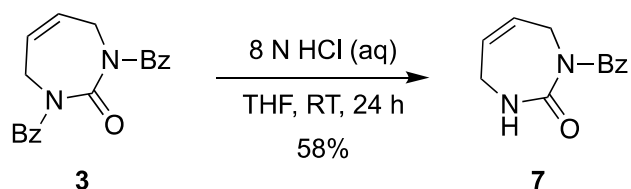

When the *bis*-Bz protected compound **3** (2.0, 6.24 mmol) was treated with 8 N HCl in THF at room temperature for 24 h, compound **7** was isolated as the major product (0.78 g, 58%).

**<sup>1</sup>H NMR** (500 MHz, DMSO-*d*<sub>6</sub>): δ 8.07 (t, *J* = 4.0 Hz, 1H), 7.53–7.49 (m, 3H), 7.45–7.41 (m, 2H), 5.87–5.83 (m, 1H), 5.81–5.77 (m, 1H), 4.32–4.30 (m, 2H), 3.87–3.85 (m, 2H) ppm.

**<sup>13</sup>C NMR** (126 MHz, DMSO-*d*<sub>6</sub>): δ 170.28, 159.47, 135.70, 131.68, 128.34, 127.26, 126.27, 125.30, 41.63 ppm.

**HRMS (ESI)  $m/z$ :** Calcd. for  $C_{12}H_{12}N_2O_2Na$   $[M + Na]^+$  239.0791; found 239.0790.

### Synthesis of Diazepinone Riboside

#### 2,3,5-Tri-*O*-benzoyl- $\alpha,\beta$ -D-ribofuranosyl bromide (**9**).

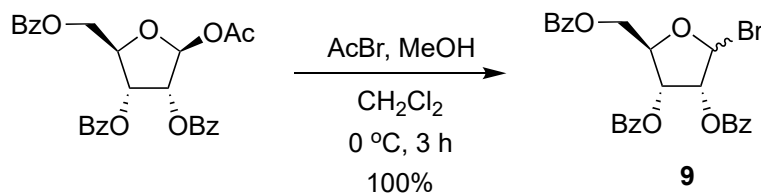

Anhydrous  $CH_2Cl_2$  (140 mL) was added to a round-bottom flask, tightly sealed, and degassed using  $10 \times$  cycles of vacuum and argon fill. Three argon balloons were used for increased pressure. The  $CH_2Cl_2$  was cooled to 0 °C and acetyl bromide (3.30 mL, 44.4 mmol) was added followed by the slow addition of MeOH (1.89 mL, 46.6 mmol). After stirring for 15 min at 0 °C, a solution of 1-*O*-acetyl-2,3,5-tri-*O*-benzoyl- $\beta$ -D-ribofuranose (5.60 g, 11.1 mmol) in anhydrous  $CH_2Cl_2$  (30 mL) was added dropwise over 20 min. After stirring at 0 °C for 3 h, the reaction mixture was concentrated *in vacuo*, keeping the bath temperature below 10 °C, to yield a pale-yellow syrup. Dry  $CH_2Cl_2$  (25 mL) and toluene (25 mL) were sequentially distilled *in vacuo* from the syrup, keeping the bath temperature below 15 °C, providing the 2,3,5-tri-*O*-benzoyl- $\alpha,\beta$ -D-ribofuranosyl bromide **7** (5.84 g, 100%) as a pale-yellow syrup; TLC (2 % MeOH- $CH_2Cl_2$ ) indicated complete conversion to the bromo sugar **9**.  $^1H$  NMR indicated the product was a 1:1 mixture of a/b-anomers.

**$^1H$  NMR** (500 MHz,  $CDCl_3$ ) (~1:1 mixture of a/b -anomers)  $\delta$  8.18–8.15 (m, 1H), 8.11–8.07 (m, 3H), 8.02–8.00 (m, 2H), 7.97–7.95 (m, 1H), 7.92–7.90 (m, 2H), 7.63–7.58 (m, 2H), 7.56–7.51 (m, 3H), 7.51–7.32 (m, 10H), 7.27–7.24 (m, 1H), 7.19–7.14 (m, 2H), 6.97 (d,  $J = 4.6$  Hz, 0.5H), 6.27 (dd,  $J = 8.0, 4.6$  Hz, 1H), 6.12 (d,  $J = 4.6$ , 1H), 5.86 (dd,  $J = 7.0, 3.1$  Hz, 0.5H), 5.46 (dd,  $J = 7.0, 4.5$  Hz, 0.5H), 4.95–4.91 (m, 1.5H), 4.85–4.80 (m, 1.5H), 4.73–4.69 (m, 1.5H) ppm.

$^{13}\text{C}$  NMR (126 MHz,  $\text{CDCl}_3$ ) (~1:1 mixture of a/b -anomers)  $\delta$  166.26, 166.09, 165.93, 165.33, 165.08, 165.01, 133.95, 133.86, 133.81, 133.79, 133.61, 133.38, 130.20, 130.08, 130.00, 129.91, 129.85, 129.56, 129.42, 129.17, 128.83, 128.77, 128.74, 128.73, 128.64, 128.62, 128.60, 128.50, 128.35, 125.43, 89.15, 87.05, 83.61, 81.69, 79.16, 72.85, 71.13, 69.83, 63.67, 63.17 ppm.

HRMS (ESI):  $m/z$  Calcd. for  $\text{C}_{26}\text{H}_{21}\text{O}_7$   $[\text{M} - \text{Br} + \text{H}]^+$  445.1282; found 445.1268.

**(2*R*,3*R*,4*R*,5*R*)-2-((Benzoyloxy)methyl)-5-(2-oxo-2,3,4,7-tetrahydro-1*H*-1,3-diazepin-1-yl)tetrahydrofuran-3,4-diyl dibenzoate (10).**

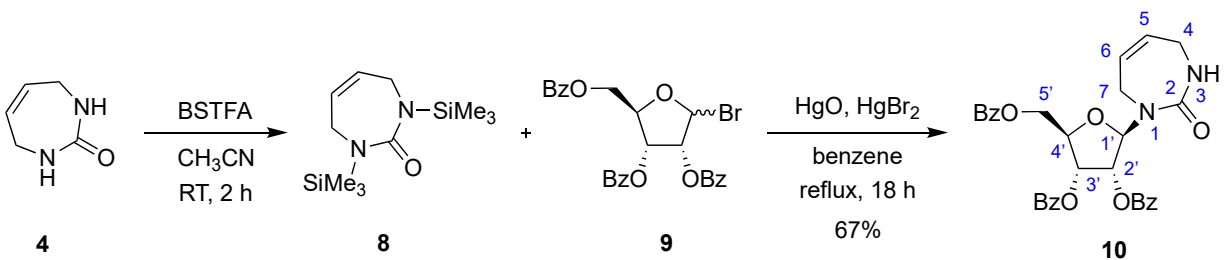

To a suspension of the 1,3-diazepinone **4** (0.75 g, 6.69 mmol) in anhydrous  $\text{CH}_3\text{CN}$  (25 mL) was added excess BSTFA (8 mL) and the mixture was stirred at room temperature for 2 h. Solvent and excess reagent were removed by evaporation under reduced pressure and the residue was dried under high vacuum for 30 min to provide the persilylated cyclic urea **8** as a clear oil, which was used immediately in the glycosylation reaction.

A solution of the persilylated cyclic urea **8** in dry benzene (15 mL) was rapidly added to a refluxing mixture of  $\text{HgO}$  (2.70 g) and  $\text{HgBr}_2$  (2.70 g) in dry benzene (150 mL) under dry  $\text{N}_2$  atmosphere. After 10 min, a solution of 2,3,5-tri-*O*-benzoyl- $\alpha,\beta$ -D-ribofuranosyl bromide **9** (4.70 g, 8.92 mmol) in dry benzene (25 mL) was rapidly added and refluxing continued for 18 h. After cooling to room temperature, the reaction mixture was filtered through a pad of celite, and the filter cake was washed with EtOAc. The combined filtrates were washed with saturated aqueous  $\text{NaHCO}_3$  (200



mL) and water (200 mL). The organic portion was dried ( $\text{Na}_2\text{SO}_4$ ), filtered and evaporated under reduced pressure to about 5 mL and applied to a silica gel column, eluting with EtOAc-hexanes (1:1), to provide the protected nucleoside **10** (2.51 g, 67%) as a white foamy solid. TLC:  $R_f = 0.45$  (55% EtOAc/hexanes).

**$^1\text{H}$  NMR** (500 MHz,  $\text{CDCl}_3$ )  $\delta$  8.15–8.13 (m, 2H, Ph), 7.96–7.93 (m, 4H, H-Ph), 7.62–7.58 (m, 1H, H-Ph), 7.56–7.48 (m, 4H, H-Ph), 7.38–7.33 (m, 4H, H-Ph), 6.13 (d,  $J = 7.5$  Hz, 1H, H-1'), 5.78 (dd,  $J = 6.0, 3.0$  Hz, 1H, H-3'), 5.64 (dd,  $J = 7.0, 6.5$  Hz, 1H, H-2'), 5.65–5.61 (m, 1H, H-5), 5.59–5.54 (m, 1H, H-6), 4.79 (dd,  $J = 13.0, 4.0$  Hz, 1H, H-5'), 4.58–4.54 (m, 3H, 3-H, H-4', H-5'), 3.90–3.83 (m, 1H, H-7), 3.80–3.76 (m, 1H, H-4), 3.71 (dd,  $J = 17.5, 6.0$  Hz, 1H, H-7), 3.60–3.55 (m, 1H, H-4) ppm.

**$^{13}\text{C}$  NMR** (126 MHz,  $\text{CDCl}_3$ )  $\delta$  166.22 (C-2), 165.63 (C=O-Bz), 165.53 (C=O-Bz), 165.47 (C=O-Bz), 133.66 (CH-Ph), 133.57 (CH-Ph), 133.54 (CH-Ph), 129.94 ( $2 \times$  CH-Ph), 129.81 ( $2 \times$  CH-Ph), 129.67 (C-Ph), 129.08 (C-Ph), 129.05 (C-Ph), 128.82 ( $2 \times$  CH-Ph), 128.58 ( $2 \times$  CH-Ph), 128.54 ( $2 \times$  CH-Ph), 127.07 (CH-5), 125.72 (CH-6), 88.40 (C-1'), 79.03 (CH-4'), 71.67 (CH-3'), 71.00 (CH-2'), 64.52 ( $\text{CH}_2$ -5'), 43.35 ( $\text{CH}_2$ -4), 41.30 ( $\text{CH}_2$ -7) ppm.

**HRMS (ESI):**  $m/z$  Calcd. for  $\text{C}_{31}\text{H}_{29}\text{N}_2\text{O}_8$   $[\text{M} + \text{H}]^+$  557.1918; found 557.1912.

**1-((2*R*,3*R*,4*S*,5*R*)-3,4-Dihydroxy-5-(hydroxymethyl)tetrahydrofuran-2-yl)-1,3,4,7-tetrahydro-2*H*-1,3-diazepin-2-one (11).**

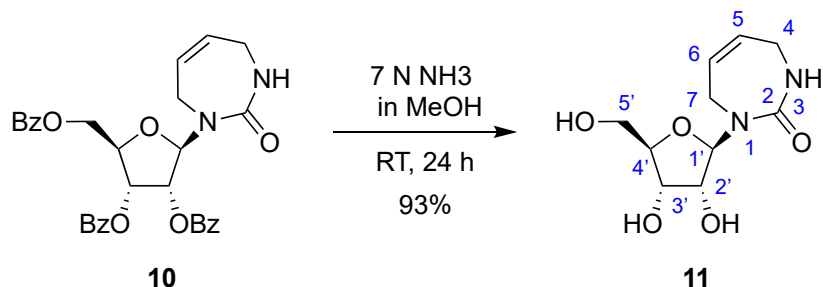

To a solution of the protected nucleoside **10** (0.28 g, 0.50 mmol) in CHCl<sub>3</sub> (2 mL) placed in a pressure bottle was added a cold solution of 7 N NH<sub>3</sub> in MeOH (35 mL) and the resulting mixture was kept at room temperature for 24 h, occasionally shaking the reaction vessel. The reaction mixture was concentrated *in vacuo* and the residue was extracted with H<sub>2</sub>O (35 mL) and the aqueous solution was repeatedly extracted with CHCl<sub>3</sub> (5 × 25 mL). The aqueous layer was filtered through a syringe filter and lyophilized to provide the de-protected nucleoside **11** (0.113 g, 93%) as an off-white powder.

**<sup>1</sup>H NMR** (500 MHz, D<sub>2</sub>O) δ 6.00–5.95 (m, 1H, H-5), 5.95–5.90 (m, 1H, H-6), 5.53 (d, *J* = 7.0, 1H, H-1'), 4.14 (t, *J* = 6.5 Hz, 1H, H-2'/3'), 4.10 (dd, *J* = 6.0, 1H, H-2'/3'), 3.94 (dd, *J* = 8.1, 4.0 Hz, 1H, H-4'), 3.91–3.85 (m, 2H, H-5'), 3.80–3.70 (m, 4H, H-4, H-7) ppm.

**<sup>1</sup>H NMR** (500 MHz, DMSO-*d*<sub>6</sub>) δ 6.08 (d, *J* = 3.2 Hz, 1H, H-3), 5.82–5.70 (m, 2H, H-5, H-6), 5.32 (d, *J* = 5.8 Hz, 1H, H-1'), 4.81 (dd, *J* = 12.4, 5.8 Hz, 2H, H-2'/3'), 4.75 (t, *J* = 5.5 Hz, 1H, H-2'/3'), 3.81–3.74 (m, 2H, H-5'), 3.70–3.57 (m, 4H, H-4, H-7), 3.54–3.40 (m, 3H, H-4', H-2'/3') ppm.

**<sup>13</sup>C NMR** (126 MHz, D<sub>2</sub>O) δ 166.37 (C-2), 128.19 (CH-5), 126.58 (CH-6), 89.72 (CH-1'), 82.87 (CH-4'), 70.61 (CH-2'), 69.97 (CH-3'), 61.53 (CH<sub>2</sub>-5'), 41.81 (CH<sub>2</sub>-4), 40.49 (CH<sub>2</sub>-7).

**HRMS (ESI):** *m/z* Calcd. for C<sub>10</sub>H<sub>17</sub>N<sub>2</sub>O<sub>5</sub> [M + H]<sup>+</sup> 245.1132; found 245.1129.

**((2*R*,3*S*,5*S*)-3-((4-Methylbenzoyl)oxy)-5-(2-oxo-2,3,4,7-tetrahydro-1*H*-1,3-diazepin-1-yl)tetrahydrofuran-2-yl)methyl 4-methylbenzoate (**15**).**

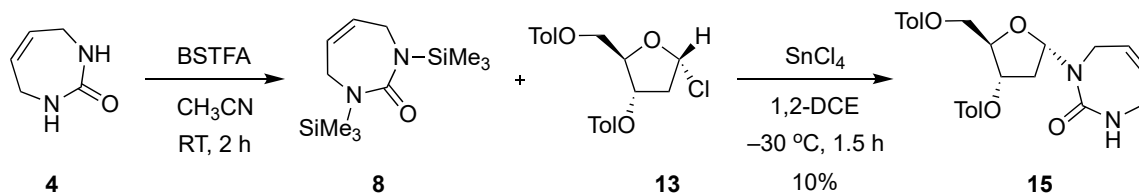

A mixture of diazepinone **4** (0.25 g, 2.23 mmol) in CH<sub>3</sub>CN (10 mL) was treated with BSTFA (2.0 mL, excess) at room temperature under argon. After stirring the reaction mixture at room temperature for 2 h, solvents were evaporated under reduced pressure. The residue was dried under high vacuum to provide the *bis*-silylated product as a clear oil, which was used as such in the glycosylation reaction.

The *bis*-silylated diazepinone **8** was dissolved in 1,2-DCE (15 mL) to give a colorless solution and cooled to -30 °C using a bath of dry ice in CH<sub>3</sub>CN. Freshly distilled SnCl<sub>4</sub> (0.81 mL, 6.95 mmol) was added, followed by Hoffer's chlorosugar **13** (0.85 g, 2.19 mmol). This gave a clear yellow solution which was stirred at -30 °C for 1.5 h, at which point the mixture had turned dark brown. Pyridine (2.5 mL) and water (12 mL) were added, and the reaction mixture was stirred at room temperature 1 h. After diluting with water (25 mL), the reaction mixture was extracted with CH<sub>2</sub>Cl<sub>2</sub> (3 × 50 mL). The combined organic fractions were filtered through a bed of celite, washed with saturated aqueous NaCl (50 mL), dried (Na<sub>2</sub>SO<sub>4</sub>), and evaporated to dryness. The resulting dark yellow residue was dissolved in CH<sub>2</sub>Cl<sub>2</sub> and purified by flash column chromatography using a silica gel column (SiliaSep, 25 g, gradient elution with 0–20% Acetone/CH<sub>2</sub>Cl<sub>2</sub>) to give the pure  $\alpha$ -anomer compound **15** (0.10 g, 10%) as a white foamy solid. TLC: 8% acetone in CH<sub>2</sub>Cl<sub>2</sub>; R<sub>f</sub> = 0.35).

**<sup>1</sup>H NMR** (500 MHz, CDCl<sub>3</sub>) δ 7.94–7.89 (m, 4H, H-Ph), 7.27–7.22 (m, 4H, H-Ph), 6.15 (dd, *J* = 7.7, 5.1 Hz, 1H, NH), 5.84–5.79 (m, 1H, H-5/6), 5.74–5.69 (m, 1H, H-5/6), 5.48 (dt, *J* = 7.5, 5.5, 2.8 Hz, 1H, H-1'), 4.64 (dd, *J* = 6.6, 4.2 Hz, 1H, H-4'), 4.53 (dd, *J* = 11.8, 4.2 Hz, 1H, H-5'), 4.48 (br s, 1H, H-3'), 4.43 (dd, *J* = 11.8, 4.4 Hz, 1H, H-5'), 3.96–3.93 (m, 2H, H-4, H-7), 3.82–3.69 (m, 2H, H-4, H-7), 2.87 (dt, *J* = 15.3, 7.7 Hz, 1H, H-2'), 2.42 (s, 3H, CH<sub>3</sub>-Tol), 2.40 (s, 3H, CH<sub>3</sub>-Tol), 2.13 (ddd, *J* = 15.1, 8.0, 3.1 Hz, 1H, H-2') ppm.

**<sup>13</sup>C NMR** (126 MHz, CDCl<sub>3</sub>) δ 166.46 (C=O-Tol), 166.11 (C=O-Tol), 165.46 (C-2), 144.41 (C-Ph), 144.06 (C-Ph), 129.86 (2 × CH-Ph), 129.71 (2 × CH-Ph), 129.42 (2 × CH-Ph), 129.35 (2 × CH-Ph), 127.24 (CH-Ph), 127.02 (CH-Ph), 126.92 (CH-5/6), 126.08 (CH-5/6), 87.82 (CH-1'), 81.77 (CH-4'), 75.60 (CH-3'), 65.13 (CH<sub>2</sub>-5'), 43.48 (CH<sub>2</sub>-7), 40.77 (CH<sub>2</sub>-4), 36.56 (CH<sub>2</sub>-2'), 21.84 (CH<sub>3</sub>-Tol), 21.82 (CH<sub>3</sub>-Tol) ppm.

**HRMS (ESI):** *m/z* Calcd. for C<sub>26</sub>H<sub>28</sub>N<sub>2</sub>O<sub>6</sub>Na [M + Na]<sup>+</sup> 487.1840; found 487.1839.

## 2-Deoxy-2-fluoro-3,5-di-*O*-benzoyl- $\alpha$ -D-arabinofuranosyl bromide (**19**).

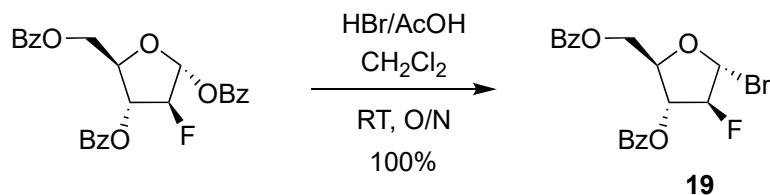

A solution of 2-deoxy-2-fluoro-1,3,5-tri-*O*-benzoyl- $\alpha$ -D-arabinofuranose (1.40 g, 3.0 mmol) in  $\text{CH}_2\text{Cl}_2$  (10 mL) was treated with a 30% HBr solution in AcOH (1.80 mL). After stirring at room temperature overnight, the reaction mixture was washed with  $\text{H}_2\text{O}$  ( $2 \times 10$  mL) and saturated  $\text{NaHCO}_3$  solution ( $2 \times 10$  mL). The organic portion was dried ( $\text{Na}_2\text{SO}_4$ ) and concentrated under reduced pressure to provide the product **19** as a pale-yellow syrup (1.27 g, 100%). TLC:  $R_f = 0.50$  (100%  $\text{CH}_2\text{Cl}_2$ ).

**$^1\text{H}$  NMR** (500 MHz,  $\text{CDCl}_3$ ):  $\delta$  8.11 (dd,  $J = 8.2, 1.2$  Hz, 2H), 8.07 (dd,  $J = 8.4, 1.2$  Hz, 2H), 7.63 (t,  $J = 7.5$  Hz, 1H), 7.57 (t,  $J = 7.4$  Hz, 1H), 7.49 (t,  $J = 7.8$  Hz, 2H), 7.43 (t,  $J = 7.8$  Hz, 2H), 6.64 (d,  $J = 12.1$  Hz, 1H), 5.60 (d,  $J = 50.0$  Hz, 1H), 5.55 (dd,  $J = 21.9, 3.6$  Hz, 1H, overlapping), 4.84–4.78 (m, 2H), 4.72 (dd,  $J = 11.5, 3.8$  Hz, 1H) ppm.

**$^{13}\text{C}$  NMR** (126 MHz,  $\text{CDCl}_3$ ):  $\delta$  166.19, 165.71, 134.08, 133.42, 130.17 (2C), 129.97 (2C), 128.82 (2C), 128.57 (2C), 100.77 (d,  $J = 191.7$ ), 87.70 (d,  $J = 31.3$ ), 84.87, 76.36 (d,  $J = 31.8$ ), 62.64 ppm.

**$^{19}\text{F}$  NMR** (470 MHz,  $\text{CDCl}_3$ ):  $\delta$  -165.92 ppm.

### Attempted Synthesis of 2'-Deoxyribo-Diazepinone Nucleoside by 2'-Deoxygenation

**(2*R*,3*R*,4*R*,5*R*)-2-((Benzoyloxy)methyl)-5-(3-(*tert*-butoxycarbonyl)-2-oxo-2,3,4,7-tetrahydro-1*H*-1,3-diazepin-1-yl)tetrahydrofuran-3,4-diyl dibenzoate (**26**).**

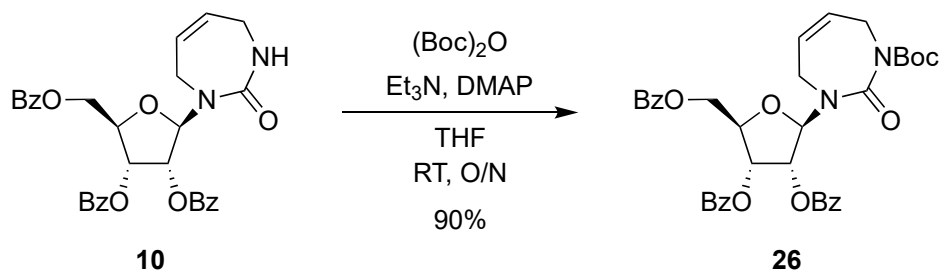

To a stirred solution of diazepinone riboside **10** (3.40 g, 6.10 mmol) in anhydrous THF (60 mL) at room temperature under argon was slowly added Et<sub>3</sub>N (1.05 mL, 7.50 mmol) followed by the addition of DMAP (0.37 g, 3.0 mmol) in one portion. After 15 min, a solution of (Boc)<sub>2</sub>O (1.64 g, 7.5 mmol) in anhydrous THF (10 mL) was added dropwise. The resulting reaction mixture stirred at room temperature overnight (TLC indicated complete conversion of the starting material), quenched with H<sub>2</sub>O (100 mL), and extracted with EtOAc (100 mL). The organic portion was washed with saturated aqueous NaCl solution (100 mL), dried (Na<sub>2</sub>SO<sub>4</sub>), filtered, and evaporated under reduced pressure. The resulting orange-brown residue was purified by flash column chromatography using a silica gel column (Biotage, 50 g, gradient elution with 0–70% EtOAc/hexanes) to provide the *N*-Boc protected nucleoside **26** (3.60 g, 90%) as a white foamy solid. TLC: R<sub>f</sub> = 0.40 (30% EtOAc-hexanes).

<sup>1</sup>H NMR (500 MHz, CDCl<sub>3</sub>): δ 8.18–8.15 (m, 2H), 7.97–7.93 (m, 4H), 7.64–7.61 (m, 1H), 7.58–7.50 (m, 4H), 7.42–7.33 (m, 4H), 6.32 (d, *J* = 7.7 Hz, 1H), 5.81 (dd, *J* = 6.0, 2.6 Hz, 1H), 5.58–5.47 (m, 2H), 4.88 (dd, *J* = 12.9, 3.6 Hz, 1H), 4.59–4.55 (m, 2H), 4.25 (d, *J* = 18.5 Hz, 1H), 3.98 (d, *J* = 18.9 Hz, 1H), 3.83 (dd, *J* = 17.0, 2.3 Hz, 1H), 3.74 (dd, *J* = 16.9, 5.0 Hz, 1H), 1.38 (s, 9H) ppm.

$^{13}\text{C}$  NMR (126 MHz,  $\text{CDCl}_3$ ):  $\delta$  166.18 (C), 165.65 (C), 165.41 (C), 158.41 (C), 153.09 (C), 133.79 (CH), 133.73 (CH), 129.96 ( $2 \times \text{CH}$ ), 129.93 ( $2 \times \text{CH}$ ), 129.82 (2C, CH), 129.53 (C), 128.97 (C), 128.93 ( $2 \times \text{CH}$ ), 128.66 ( $2 \times \text{CH}$ ), 128.60 ( $2 \times \text{CH}$ ), 128.41 (CH), 123.95, 86.84 (CH), 82.16 (C), 79.97 (CH), 71.66 (CH), 71.31 (CH), 64.31 ( $\text{CH}_2$ ), 43.98 ( $\text{CH}_2$ ), 39.67 ( $\text{CH}_2$ ), 28.20 ( $(\text{CH}_3)_3$ ) ppm.

***tert*-Butyl 3-((2*R*,3*R*,4*S*,5*R*)-3,4-dihydroxy-5-(hydroxymethyl)tetrahydrofuran-2-yl)-2-oxo-2,3,4,7-tetrahydro-1*H*-1,3-diazepine-1-carboxylate (**27**).**

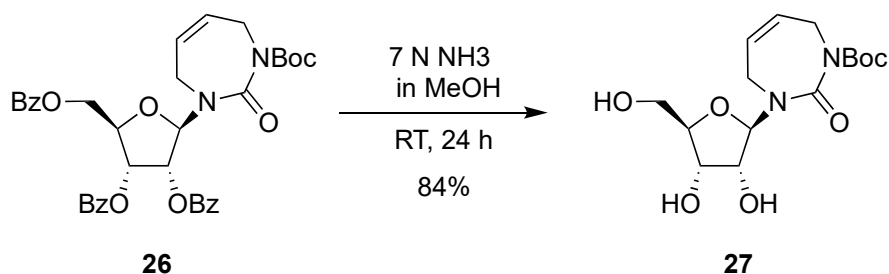

To a solution of the protected nucleoside **26** (0.60 g, 0.91 mmol) in  $\text{CHCl}_3$  (2 mL) placed in a pressure bottle was added a cold solution of 7 N  $\text{NH}_3$  in MeOH (70 mL) and the resulting mixture was kept at room temperature for 24 h, occasionally shaking the reaction vessel. The reaction mixture was concentrated *in vacuo* and the residue was extracted with  $\text{H}_2\text{O}$  (50 mL) and the aqueous solution was repeatedly extracted with  $\text{CHCl}_3$  ( $5 \times 25$  mL). The aqueous layer was filtered through a syringe filter and lyophilized to provide the de-protected nucleoside **27** (0.26 g, 84%) as an off-white solid.

$^1\text{H}$  NMR (500 MHz,  $\text{CDCl}_3$ ):  $\delta$  5.91–5.87 (m, 1H), 5.80–5.77 (m, 1H), 5.70 (d,  $J = 5.7$  Hz, 1H, H-1'), 4.33 (d,  $J = 18.9$  Hz, 1H), 4.16–4.11 (m, 3H), 4.03 (q,  $J = 3.5$  Hz, 1H), 4.0–3.95 (m, 1H), 3.90 (dd,  $J = 17.3, 5.6$  Hz, 1H), 3.80 (dd,  $J = 12.6, 3.4$  Hz, 1H), 3.74 (dd,  $J = 12.6, 4.6$  Hz, 1H), 1.49 (s, 9H) ppm.

$^{13}\text{C}$  NMR (126 MHz,  $\text{CDCl}_3$ ):  $\delta$  159.85, 153.70, 127.79, 123.50, 88.83, 84.30, 83.96, 71.53, 70.11, 61.35, 43.70, 39.67, 27.33 ppm.

*tert*-Butyl 3-((6*aR*,8*R*,9*R*,9*aS*)-9-hydroxy-2,2,4,4-tetraisopropyltetrahydro-6*H*-furo[3,2-*f*][1,3,5,2,4]trioxadisilocin-8-yl)-2-oxo-2,3,4,7-tetrahydro-1*H*-1,3-diazepine-1-carboxylate (28).

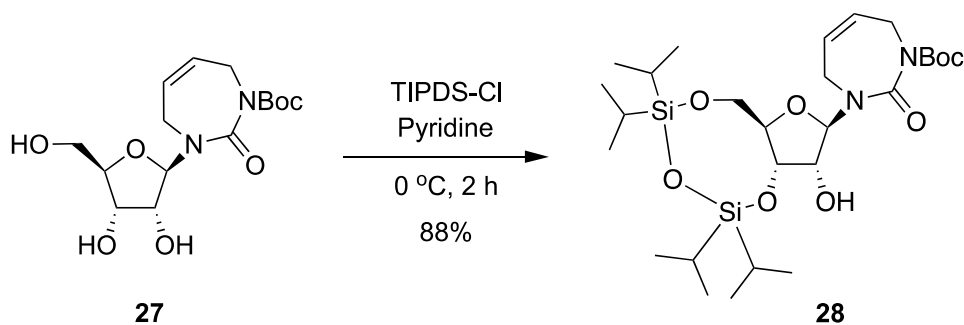

The *N*-Boc protected diazepinone riboside **27** (0.26 g, 0.74 mmol) was dissolved in anhydrous pyridine (15 mL) and the solution was cooled to 0 °C using ice bath. TIPDS-Cl (0.31 mL, 0.96 mmol) was added dropwise. The resulting reaction mixture was stirred at 0 °C for 2 h, and then quenched with ice. The solvents were evaporated under reduced pressure to give a yellow oil. The residue was dissolved in EtOAc (50 mL) and washed with saturated aqueous  $\text{NaHCO}_3$  solution and saturated aqueous  $\text{NaCl}$  solution. The organic portion was dried ( $\text{Na}_2\text{SO}_4$ ), filtered, and concentrated in *vacuo* to give a yellow oil. This material was dissolved in a minimum volume of 10% EtOAc/hexanes and purified by flash column chromatography using a silica gel column (Biotage, 25 g, gradient elution with 0–30% EtOAc/hexanes) to provide 3,5-TIPDS-protected nucleoside **28** (0.38 g, 88%) as a white foamy solid. TLC:  $R_f$  = 0.25 (20% EtOAc/hexanes).

$^1\text{H}$  NMR (500 MHz,  $\text{CDCl}_3$ ):  $\delta$  5.77–5.73 (m, 1H), 5.72–5.68 (m, 1H), 5.55 (d,  $J$  = 2.7 Hz, 1H, H-1'), 4.39 (t,  $J$  = 13.5 Hz, 1H), 4.26 (br d,  $J$  = 18.8 Hz, 1H), 4.15 (br d,  $J$  = 19.7 Hz, 1H), 4.03–3.98 (m, 3H), 3.91–3.86 (m, 2H), 3.73 (q,  $J$  = 7.2 Hz, 1H), 1.47 (s, 9H), 1.11–1.02 (m, 28H) ppm.



$^{13}\text{C}$  NMR (126 MHz,  $\text{CDCl}_3$ ):  $\delta$  157.39 (C), 153.05 (C), 128.74 (CH), 124.17 (CH), 91.87 (CH), 82.00 (C), 81.58 (CH), 73.57 (CH), 70.95 (CH), 62.10 ( $\text{CH}_2$ ), 43.75 ( $\text{CH}_2$ ), 41.37 ( $\text{CH}_2$ ), 28.34 ( $(\text{CH}_3)_3$ ), 17.58, 17.49, 17.45, 17.43, 17.25, 17.11, 17.01, 13.50, 13.25, 12.94, 12.71 ppm.

*tert*-butyl 2-oxo-3-((6*aR*,8*R*,9*R*,9*aR*)-2,2,4,4-tetraisopropyl-9-((phenoxy-carbonylthio)oxy)tetrahydro-6*H*-furo[3,2-*f*][1,3,5,2,4]trioxadisilocin-8-yl)-2,3,4,7-tetrahydro-1*H*-1,3-diazepine-1-carboxylate (**29**).

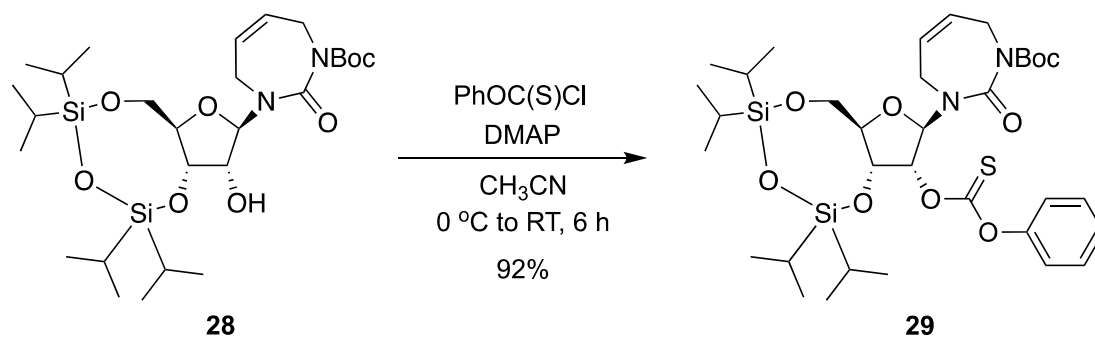

To a stirring solution of 3,5-TIPDS-protected riboside **28** (1.02 g, 1.74 mmol) in anhydrous  $\text{CH}_3\text{CN}$  (30 mL) at 0 °C was added DMAP (0.62 g, 5.10 mmol). After stirring the mixture under argon for 5 min, phenylthiochloroformate (0.45 g, 2.6 mmol) was added dropwise. The resulting reaction mixture was stirred at 0 °C for 15 min, warmed to room temperature and stirred for 6 h. After the reaction was complete, solvent was removed under reduced pressure. The residue was dissolved in EtOAc (100 mL) and washed with saturated aqueous  $\text{NaHCO}_3$  solution (50 mL) and saturated aqueous  $\text{NaCl}$  solution (50 mL), dried over  $\text{Na}_2\text{SO}_4$ , filtered, and evaporated under reduced pressure. The residue was purified by flash column chromatography using a silica gel column (Biotage, 25 g, gradient elution with 0–50% EtOAc/hexanes) to provide intermediate **29** (1.16 g, 92%) as a yellow gum. TLC:  $R_f$  = 0.40 (20% EtOAc/hexanes).

$^1\text{H}$  NMR (500 MHz,  $\text{CDCl}_3$ ):  $\delta$  7.40 (t,  $J$  = 7.9 Hz, 2H), 7.28 (t,  $J$  = 7.4 Hz, 1H), 7.10 (d,  $J$  = 7.7 Hz, 2H), 5.86 (d,  $J$  = 1.7 Hz, 1H), 5.78 (dd,  $J$  = 5.9, 1.5 Hz, 1H), 5.80–5.71 (m, 2H, overlapping),

4.52 (dd,  $J = 8.7, 5.9$  Hz, 1H), 4.31 (br d,  $J = 19.1$  Hz, 1H), 4.15–4.11 (m, 2H), 4.01 (dd,  $J = 13.1, 2.7$  Hz, 1H), 4.00–3.96 (m, 1H, overlapping), 3.88 (dt,  $J = 8.7, 2.5$  Hz, 1H), 3.78 (dd,  $J = 16.9, 5.2$  Hz, 1H), 1.47 (s, 9H), 1.12–1.05 (m, 28H) ppm.

$^{13}\text{C}$  NMR (126 MHz,  $\text{CDCl}_3$ ):  $\delta$  194.17 (C), 157.19 (C), 153.55 (C), 153.09 (C), 129.65 ( $2 \times \text{CH-Ph}$ ), 128.98 (CH-Ph), 126.74 (CH-Ph), 123.74 (CH-Ph), 121.93 ( $2 \times \text{CH-Ph}$ ), 89.21 (CH-1'), 83.61 (CH-2'), 82.20 (C-*t*Bu), 81.10 (CH-4'), 69.42 (CH-3'), 60.28 ( $\text{CH}_2$ -5'), 43.77 ( $\text{CH}_2$ -7), 40.91 ( $\text{CH}_2$ -4), 28.36 ( $3 \times \text{CH}_3$ -*t*Bu), 17.55, 17.48, 17.45, 17.41, 17.23, 17.19, 17.14, 17.02 ( $\text{CH}_3$ -TIPDS), 13.48, 13.15, 12.97, 12.90 (CH-TIPDS) ppm.

***tert*-Butyl**                      **2-oxo-3-((6*R*,8*R*,9*a*S)-2,2,4,4-tetraisopropyltetrahydro-6*H*-furo[3,2-*f*][1,3,5,2,4]trioxadisilocin-8-yl)-2,3,4,7-tetrahydro-1*H*-1,3-diazepine-1-carboxylate (30).**

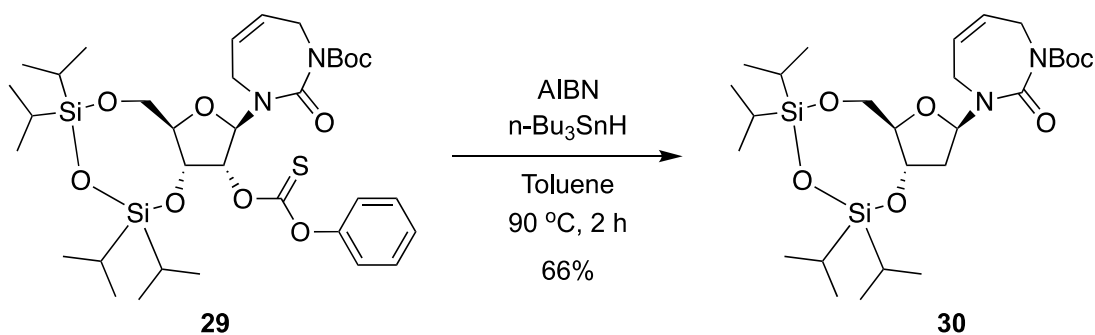

To a solution of compound **29** (0.44 g, 0.68 mmol) in toluene (12 mL) were added AIBN (0.033 g, 0.20 mmol) and tributyltin hydride (0.32 mL, 1.19 mmol) at room temperature. The mixture was degassed using vacuum-argon fill cycles ( $5 \times$ ) and then heated to  $90\text{ }^\circ\text{C}$  for 2 h. After cooling the reaction mixture to room temperature, solvent was removed under reduced pressure. The residue was purified by flash column chromatography using a silica gel column (Biotage, 25 g, gradient elution with 0–50% EtOAc/hexanes) to provide deoxygenated intermediate **30** (0.26 g, 66%) as a white foamy solid. TLC:  $R_f = 0.66$  (20% EtOAc/hexanes).

**<sup>1</sup>H NMR** (500 MHz, CDCl<sub>3</sub>): δ 6.02 (dd, *J* = 7.8, 4.6 Hz, 1H, H-1'), 5.80–5.75 (m, 1H, H-5/6), 5.70–5.66 (m, 1H, H-5/6), 4.47 (q, *J* = 7.6 Hz, 1H, H-3'), 4.27–4.23 (m, 1H, H-4/7), 4.14–4.10 (m, 1H, H-4/7), 4.02 (dd, *J* = 12.4, 3.4 Hz, 1H, H-5'), 3.93 (dd, *J* = 12.4, 4.8 Hz, 1H, H-5'), 3.87–3.83 (m, 1H, H-4/7), 3.73 (dd, *J* = 16.8, 4.3 Hz, 1H, H-4/7), 3.66 (ddd, *J* = 8.0, 4.7, 3.6 Hz, 1H, H-4'), 2.27 (ddd, *J* = 15.5, 13.6, 7.7 Hz, 1H, H-2'), 2.04 (ddd, *J* = 13.0, 8.0, 4.5 Hz, 1H, H-2'), 1.47 (s, 9H, *t*Bu), 1.10–1.01 (m, 28H, TIPDS) ppm.

**<sup>13</sup>C NMR** (126 MHz, CDCl<sub>3</sub>): δ 157.22 (C), 153.09 (C), 128.57 (CH-5/6), 124.47 (CH-5/6), 84.13 (CH-4'), 83.96 (CH-1'), 81.95 (C-*t*Bu), 70.26 (CH-3'), 61.82 (CH<sub>2</sub>-5'), 43.79 (CH<sub>2</sub>-7), 39.35 (CH<sub>2</sub>-4), 38.17 (CH<sub>2</sub>-2'), 28.36 (3 × CH<sub>3</sub>-*t*Bu), 17.62, 17.52, 17.49, 17.48, 17.21, 17.11, 17.01 (CH<sub>3</sub>-TIPDS), 13.60, 13.31, 13.01, 12.65 (CH-TIPDS) ppm.

***tert*-Butyl 3-((2*R*,4*S*,5*R*)-4-hydroxy-5-(hydroxymethyl)tetrahydrofuran-2-yl)-2-oxo-2,3,4,7-tetrahydro-1*H*-1,3-diazepine-1-carboxylate (**31**).**

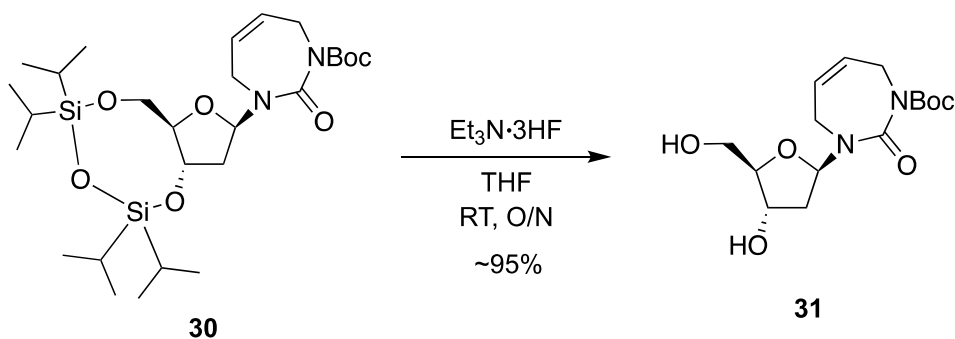

To a solution of the protected 2-deoxy nucleoside **30** (0.22 g, 0.38 mmol) in anhydrous THF (4 mL) was added Et<sub>3</sub>N·3HF (0.32 mL, 1.9 mmol) and Et<sub>3</sub>N (0.13 mL, 0.77 mmol). The resulting reaction mixture was stirred at room temperature overnight. The solvents were evaporated under reduced pressure and coevaporated with toluene and then chloroform. The residue was dissolved in a minimum volume of CH<sub>2</sub>Cl<sub>2</sub> and purified by flash column chromatography using a silica gel

column (Biotage, 10 g, gradient elution with 0–10% MeOH/CH<sub>2</sub>Cl<sub>2</sub>) to provide the TIPDS deprotected nucleoside **31** (0.13 g, ~95%) as a viscid solid (contains trace amounts of Et<sub>3</sub>N·3HF).

TLC: R<sub>f</sub> = 0.30 (100% EtOAc).

<sup>1</sup>H NMR (500 MHz, CDCl<sub>3</sub>): δ 6.03 (t, *J* = 7.0 Hz, 1H), 5.83–5.78 (m, 1H), 5.70–5.66 (m, 1H), 4.45 (q, *J* = 5.0 Hz, 1H), 4.23 (br d, *J* = 18.8 Hz, 1H), 4.14 (br d, *J* = 19.0 Hz, 1H), 3.86 (q, *J* = 4.0 Hz, 1H, overlapping), 3.85–3.75 (m, 4H), 2.15–2.09 (m, 2H) ppm.

<sup>13</sup>C NMR (126 MHz, CDCl<sub>3</sub>): δ 157.59 (C), 153.04 (C), 128.50 (CH), 124.51 (CH), 86.33 (CH), 85.77 (CH), 82.07 (C), 71.54, 62.72 (CH<sub>2</sub>), 43.88 (CH<sub>2</sub>), 40.52 (CH<sub>2</sub>), 38.15 (CH<sub>2</sub>), 28.34 (CH<sub>3</sub>)<sub>3</sub> ppm.

Copies of  $^1\text{H}$ ,  $^{13}\text{C}$ , DEPT-135, and  $^{19}\text{F}$  NMR spectra:

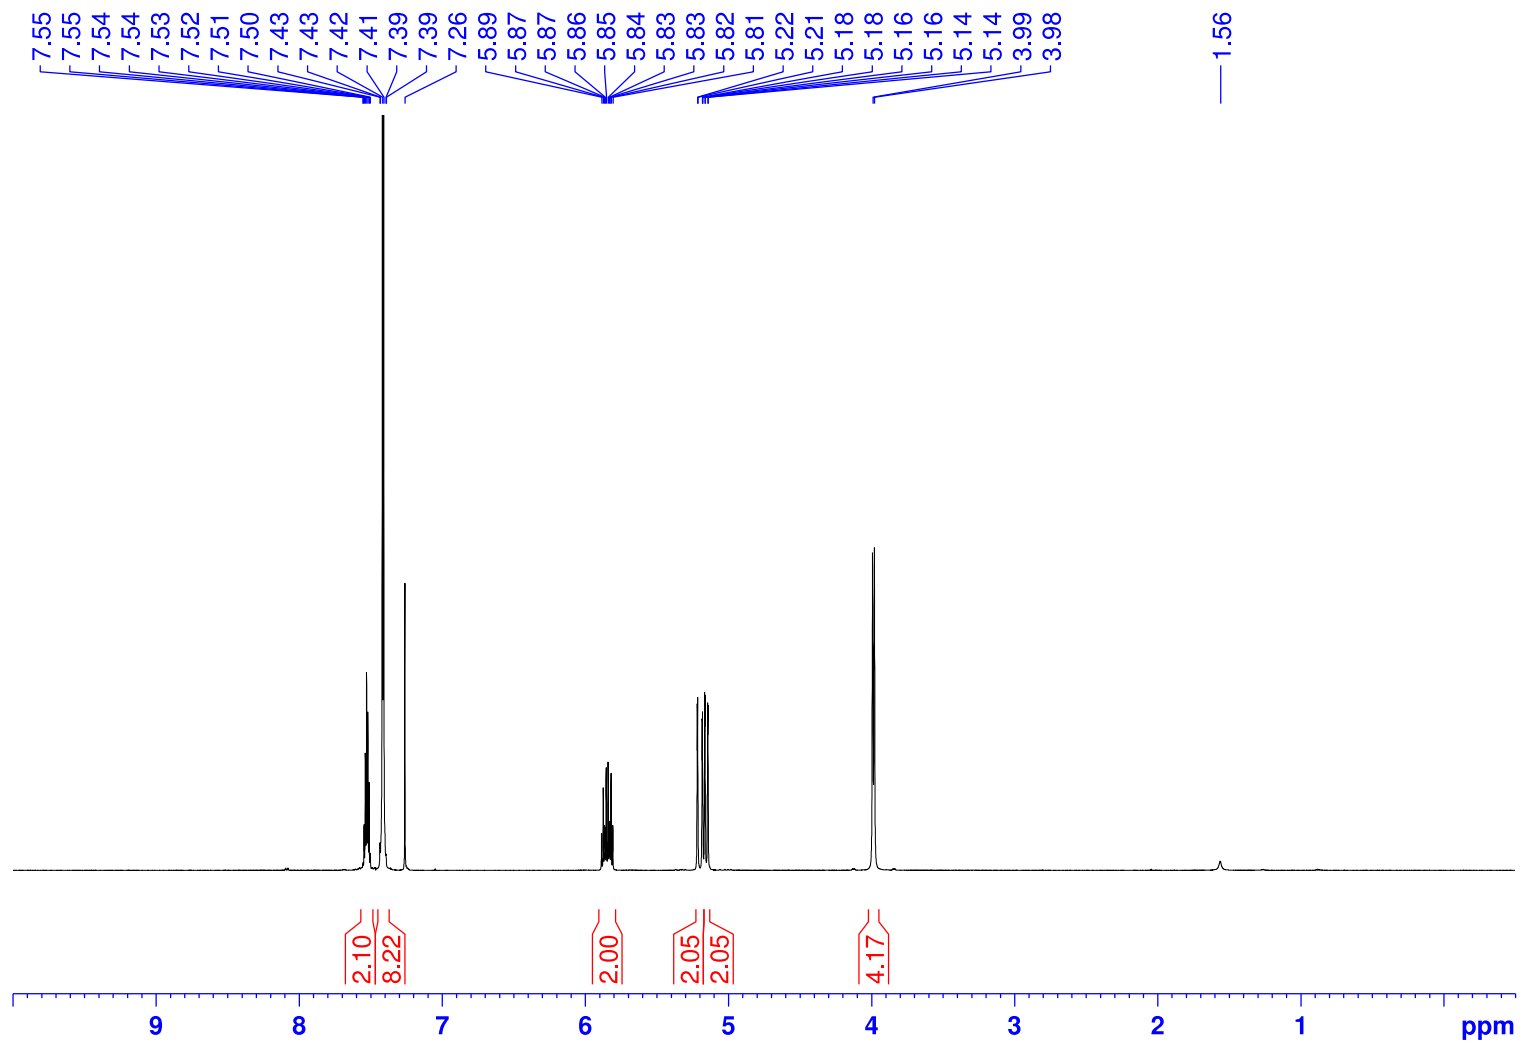

$^1\text{H}$  NMR spectrum of compound 2 (500 MHz,  $\text{CDCl}_3$ )

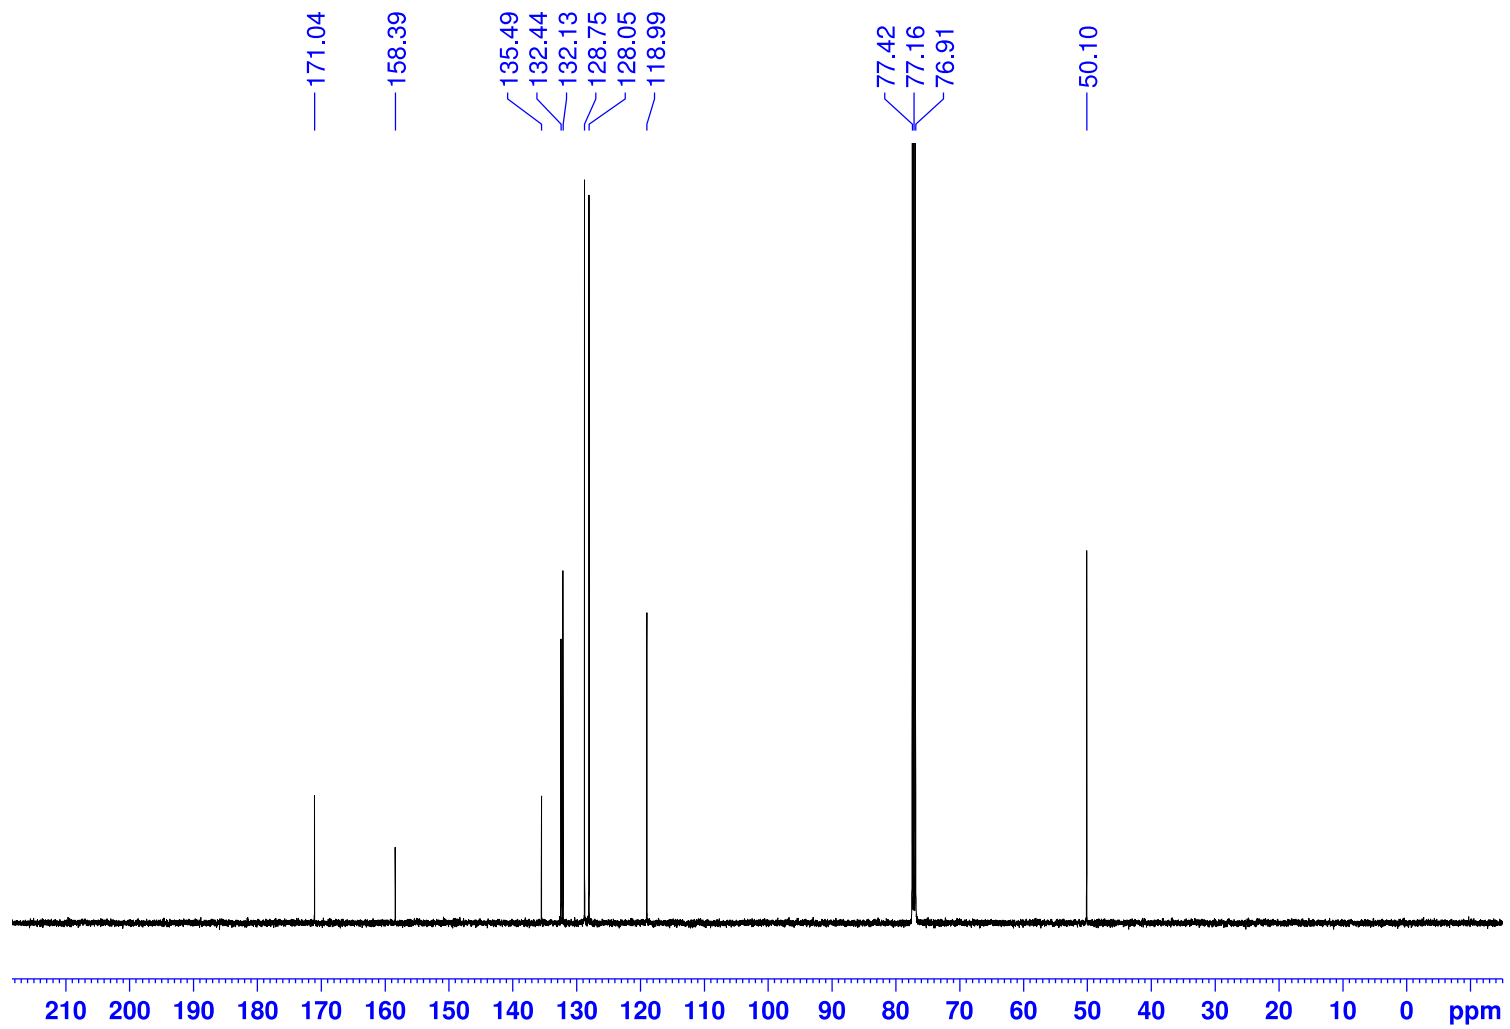

$^{13}\text{C}$  NMR spectrum of compound 2 (126 MHz,  $\text{CDCl}_3$ )

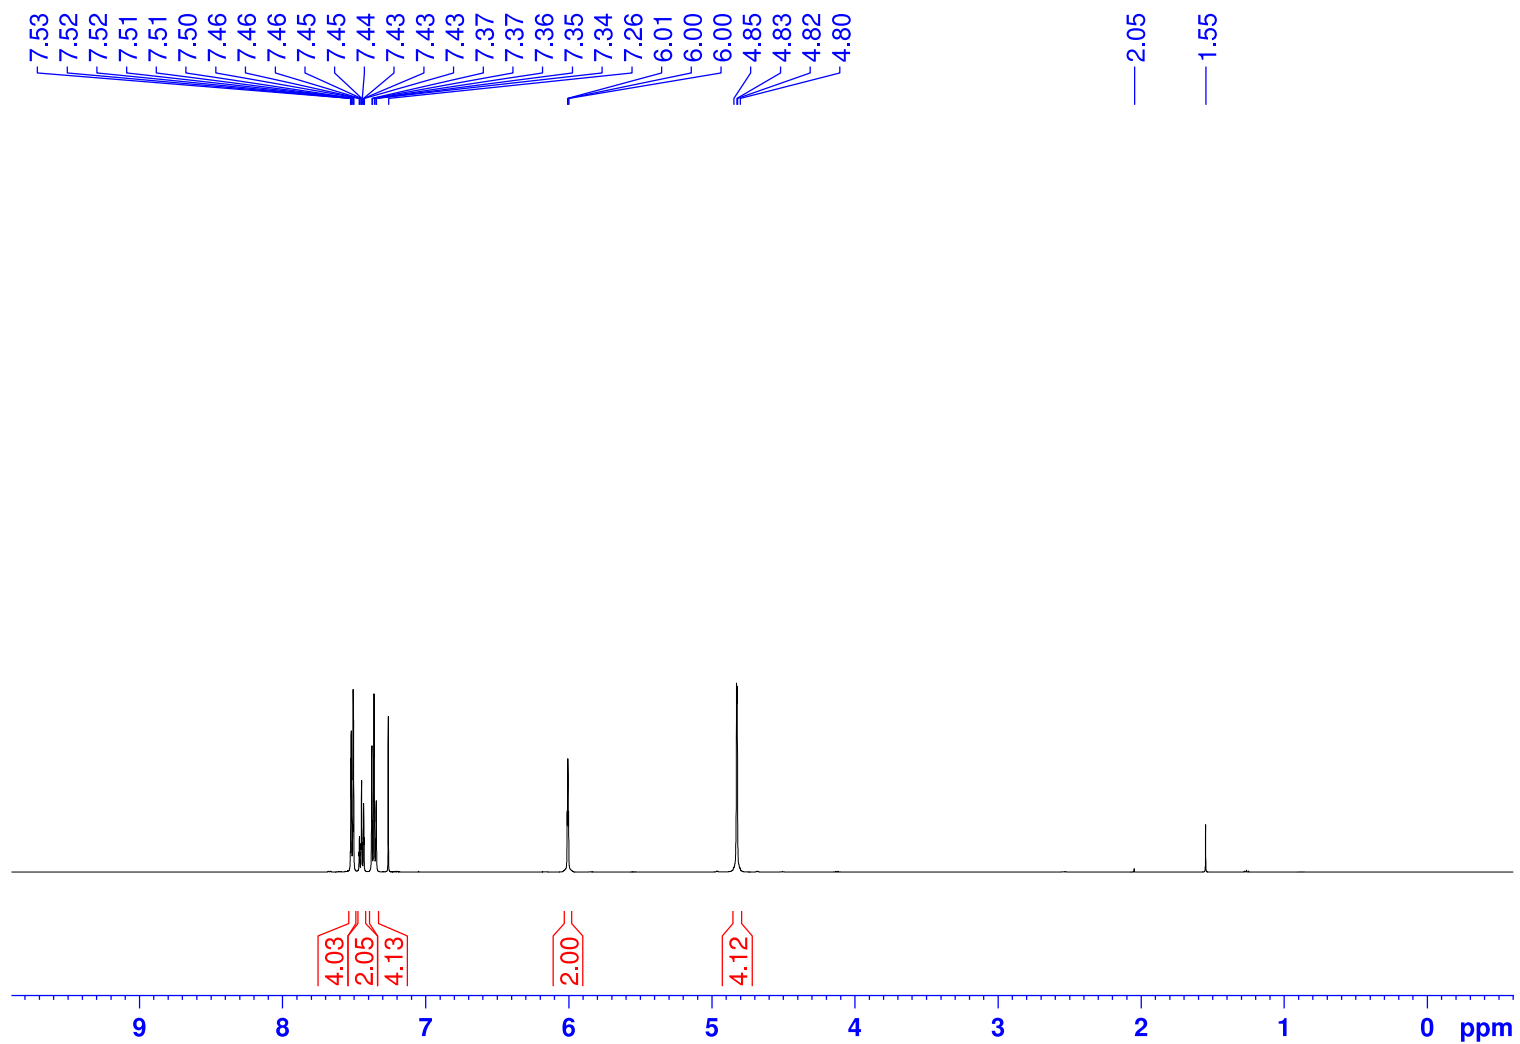

$^1\text{H}$  NMR spectrum of compound 3 (500 MHz,  $\text{CDCl}_3$ )

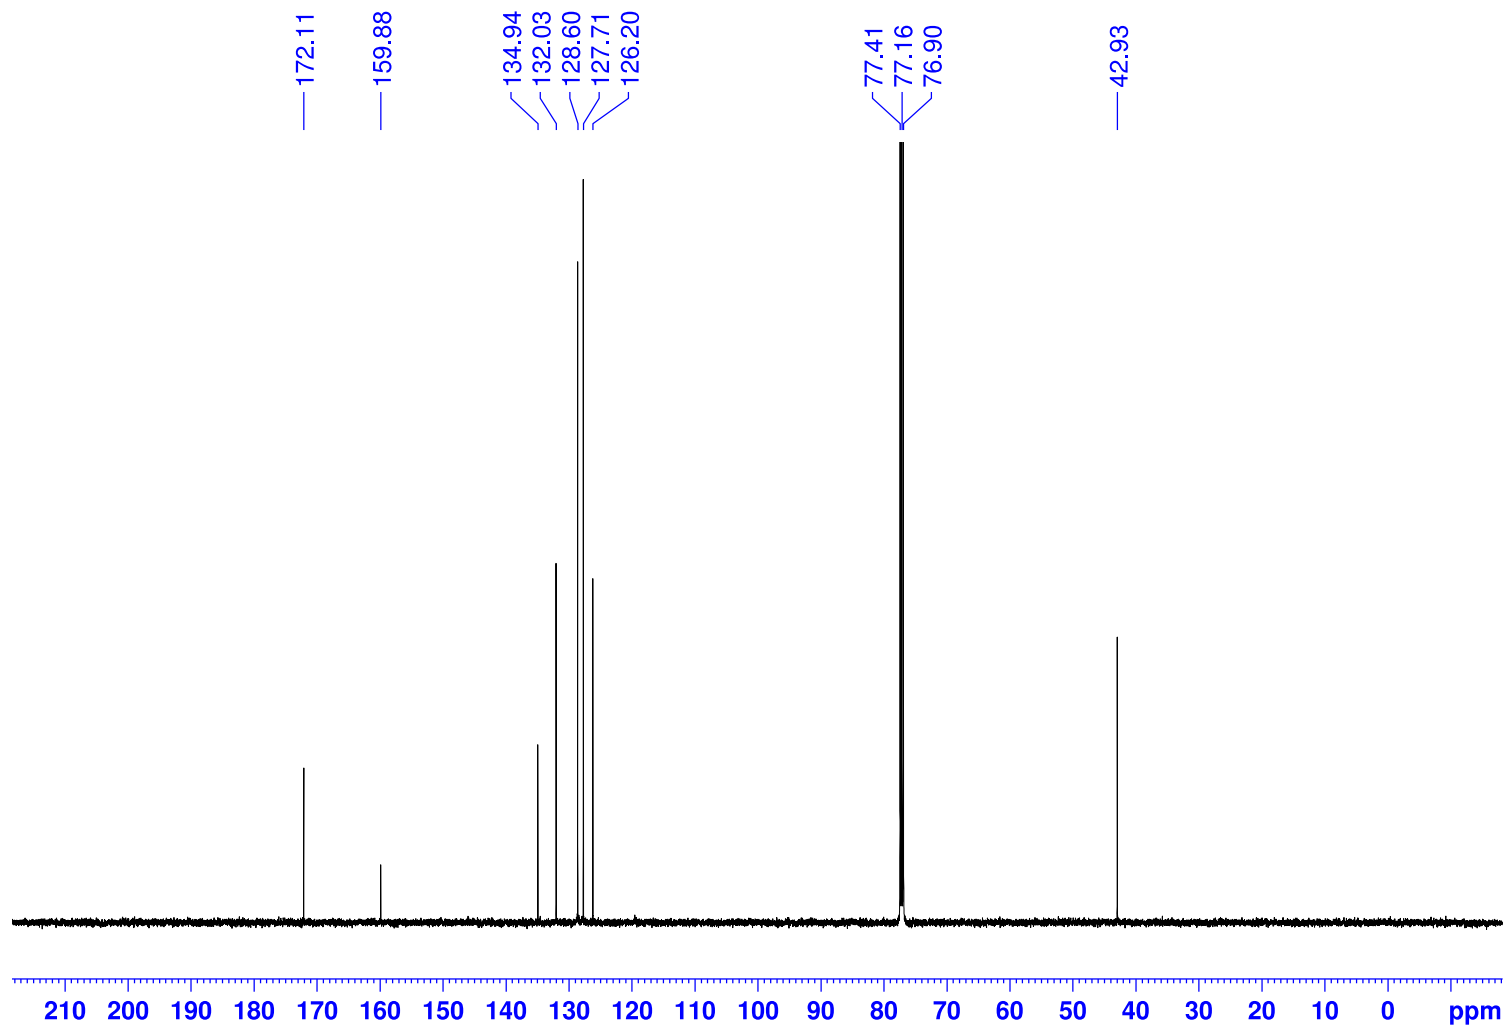

<sup>13</sup>C NMR spectrum of compound 3 (126 MHz, CDCl<sub>3</sub>)



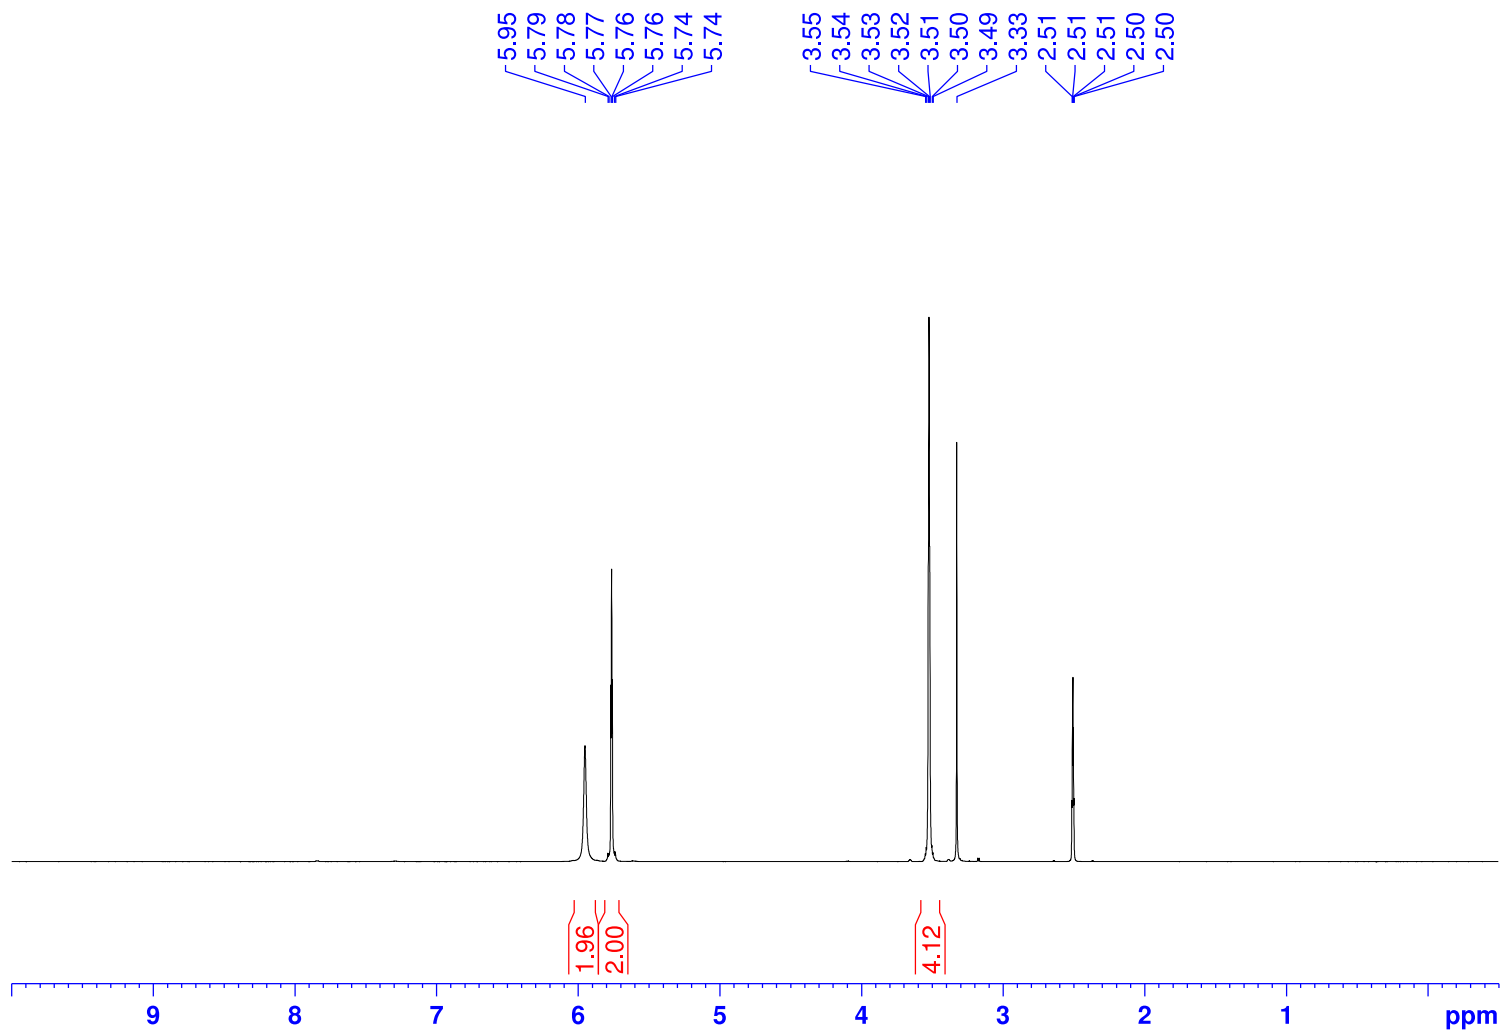

**<sup>1</sup>H NMR spectrum of compound 4 (500 MHz, DMSO-*d*<sub>6</sub>)**

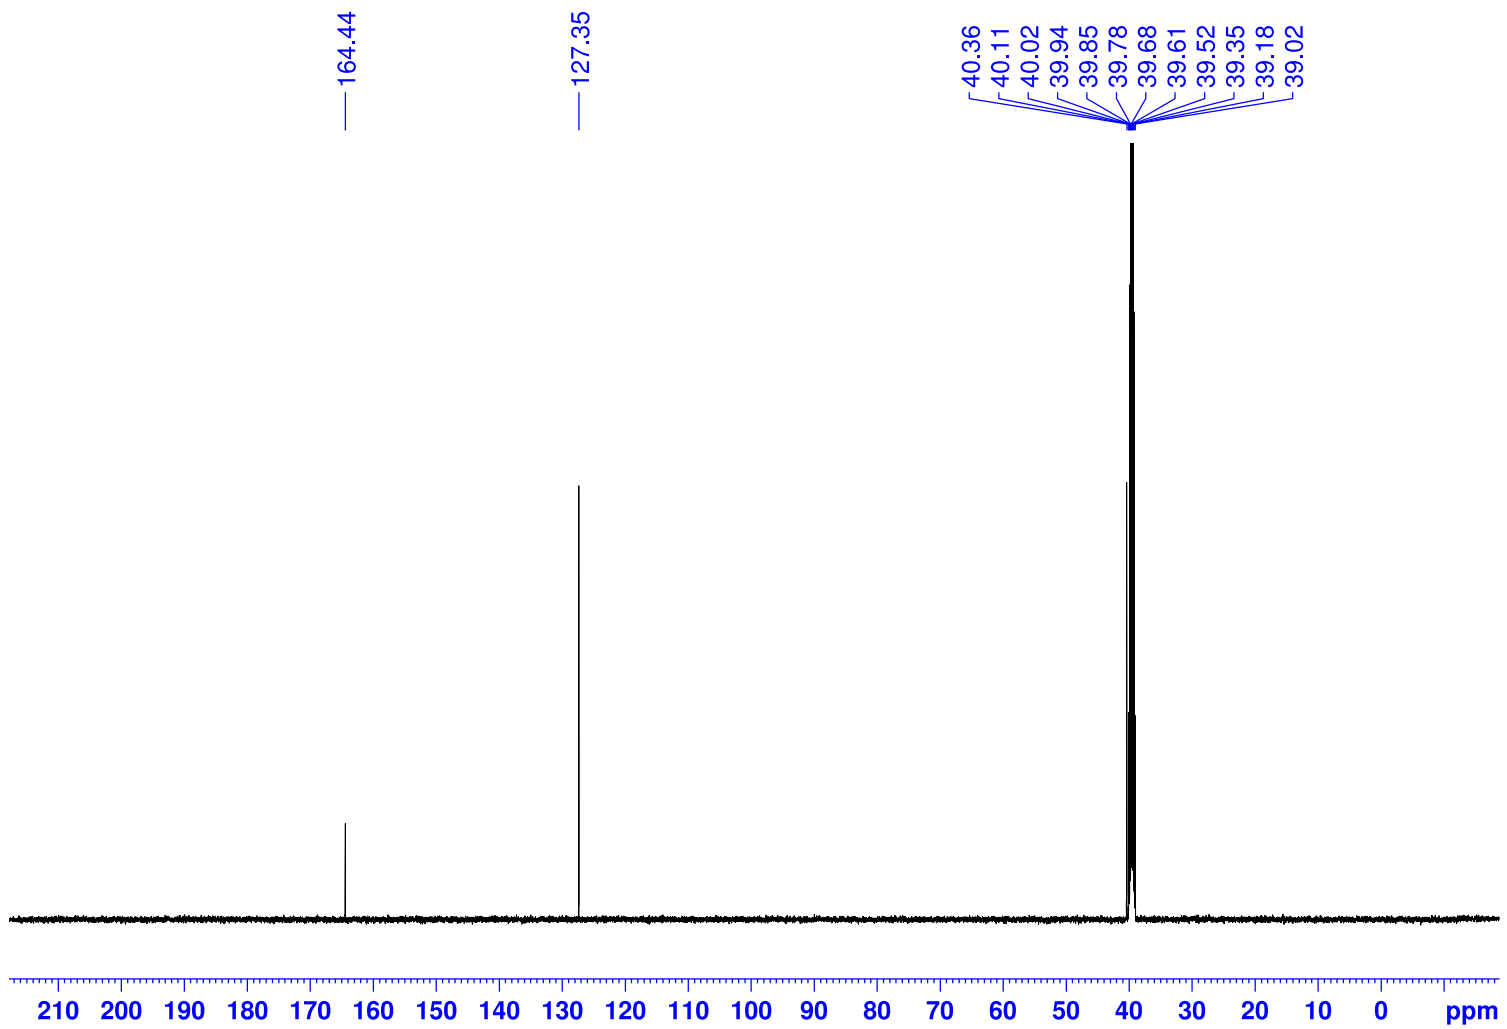

$^{13}\text{C}$  NMR spectrum of compound 4 (126 MHz,  $\text{DMSO-}d_6$ )

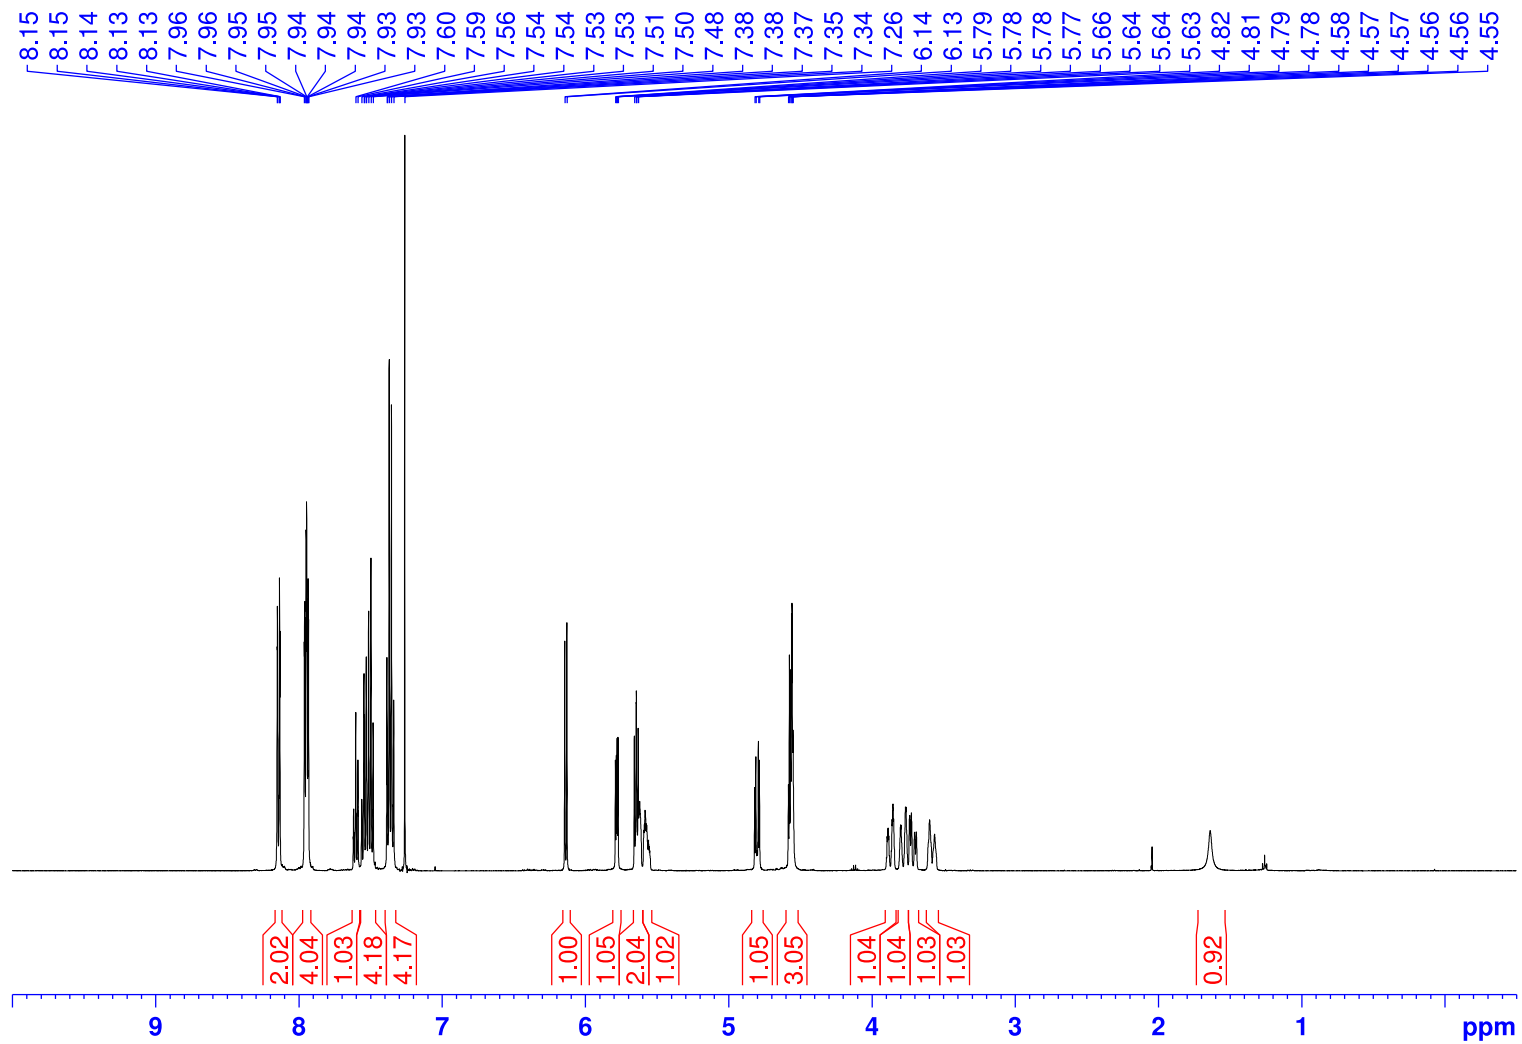

<sup>1</sup>H NMR spectrum of compound 10 (500 MHz, CDCl<sub>3</sub>)

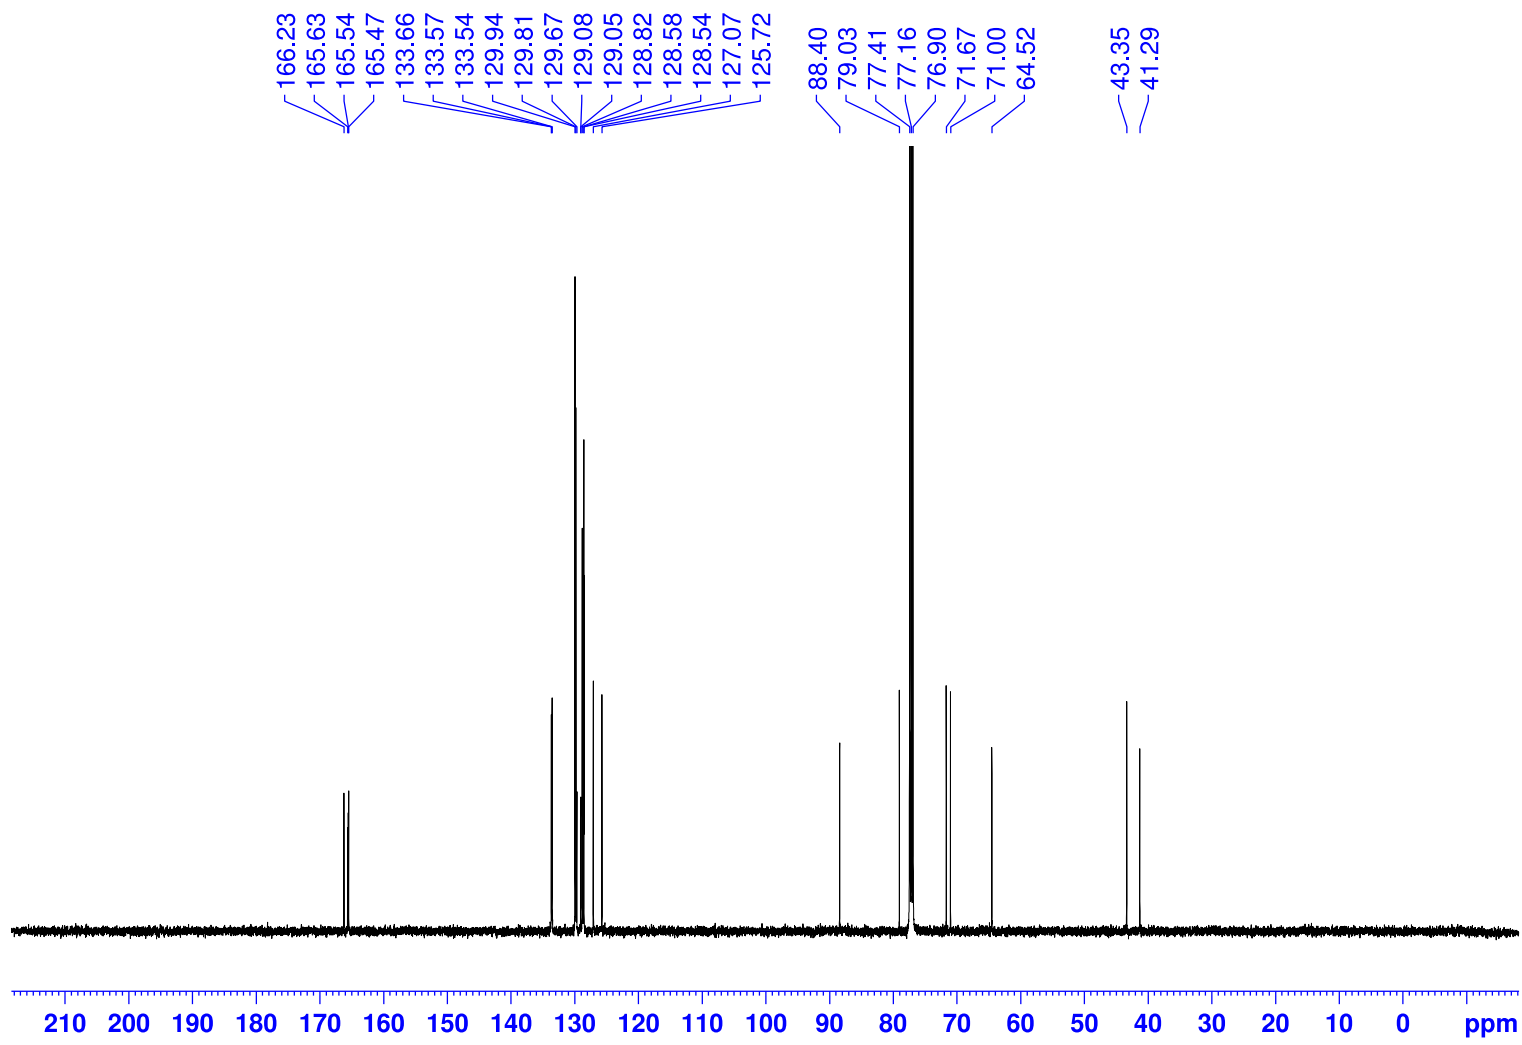

<sup>13</sup>C NMR spectrum of compound 10 (126 MHz, CDCl<sub>3</sub>)

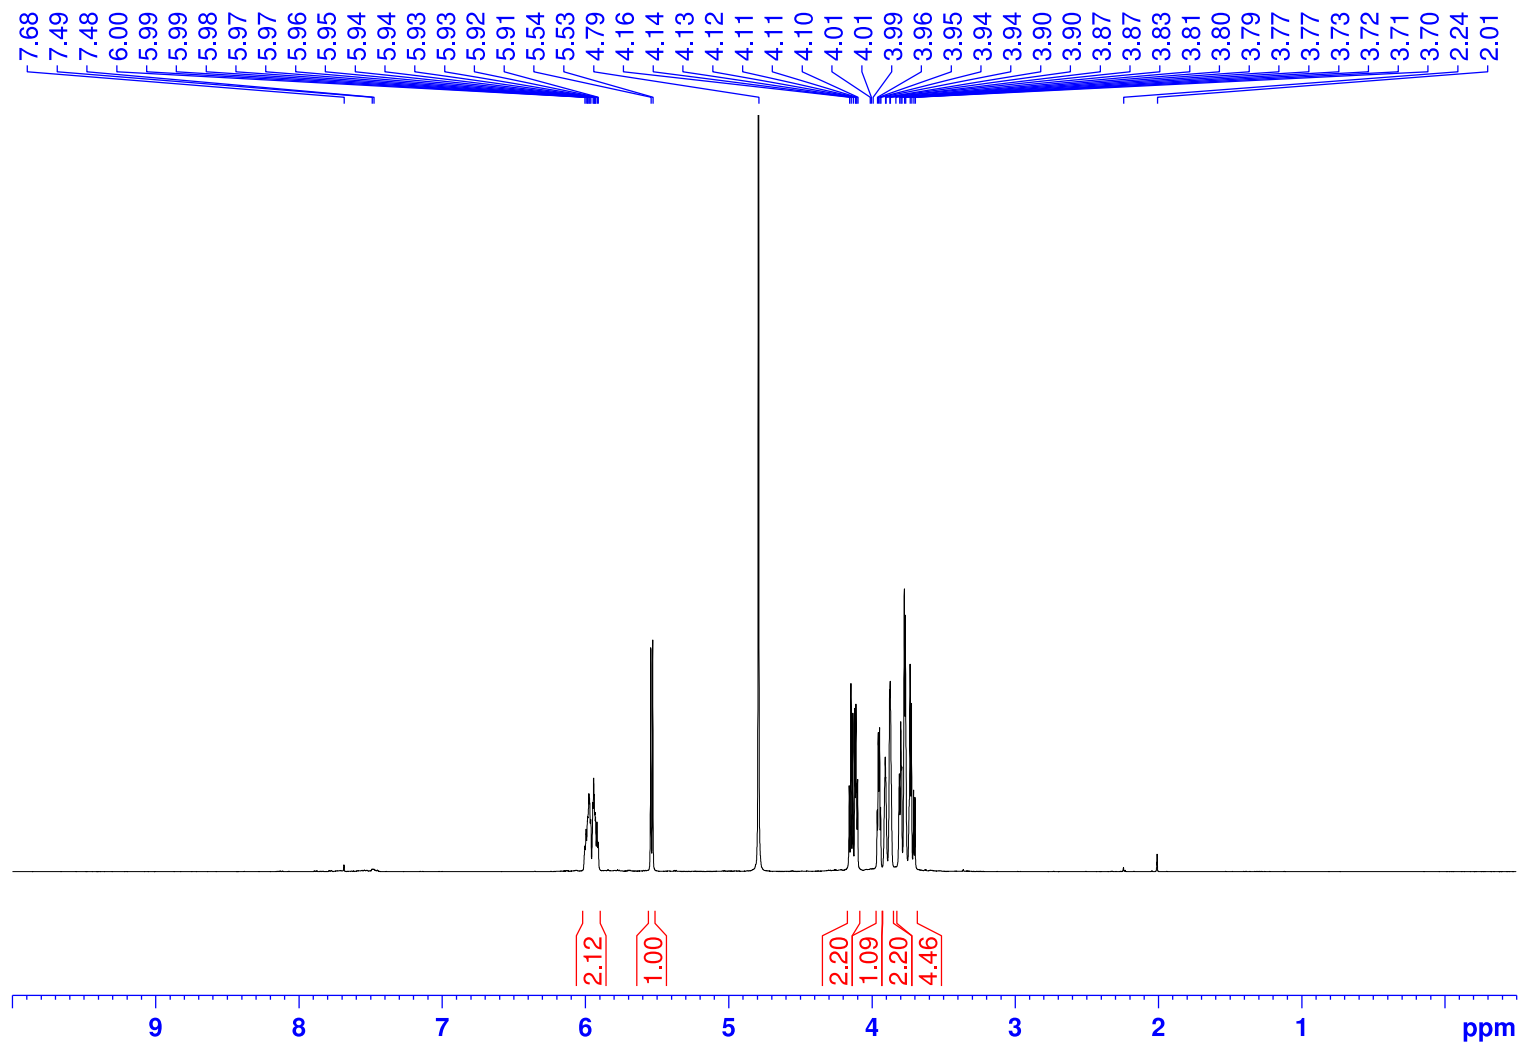

<sup>1</sup>H NMR spectrum of compound 11 (500 MHz, D<sub>2</sub>O)

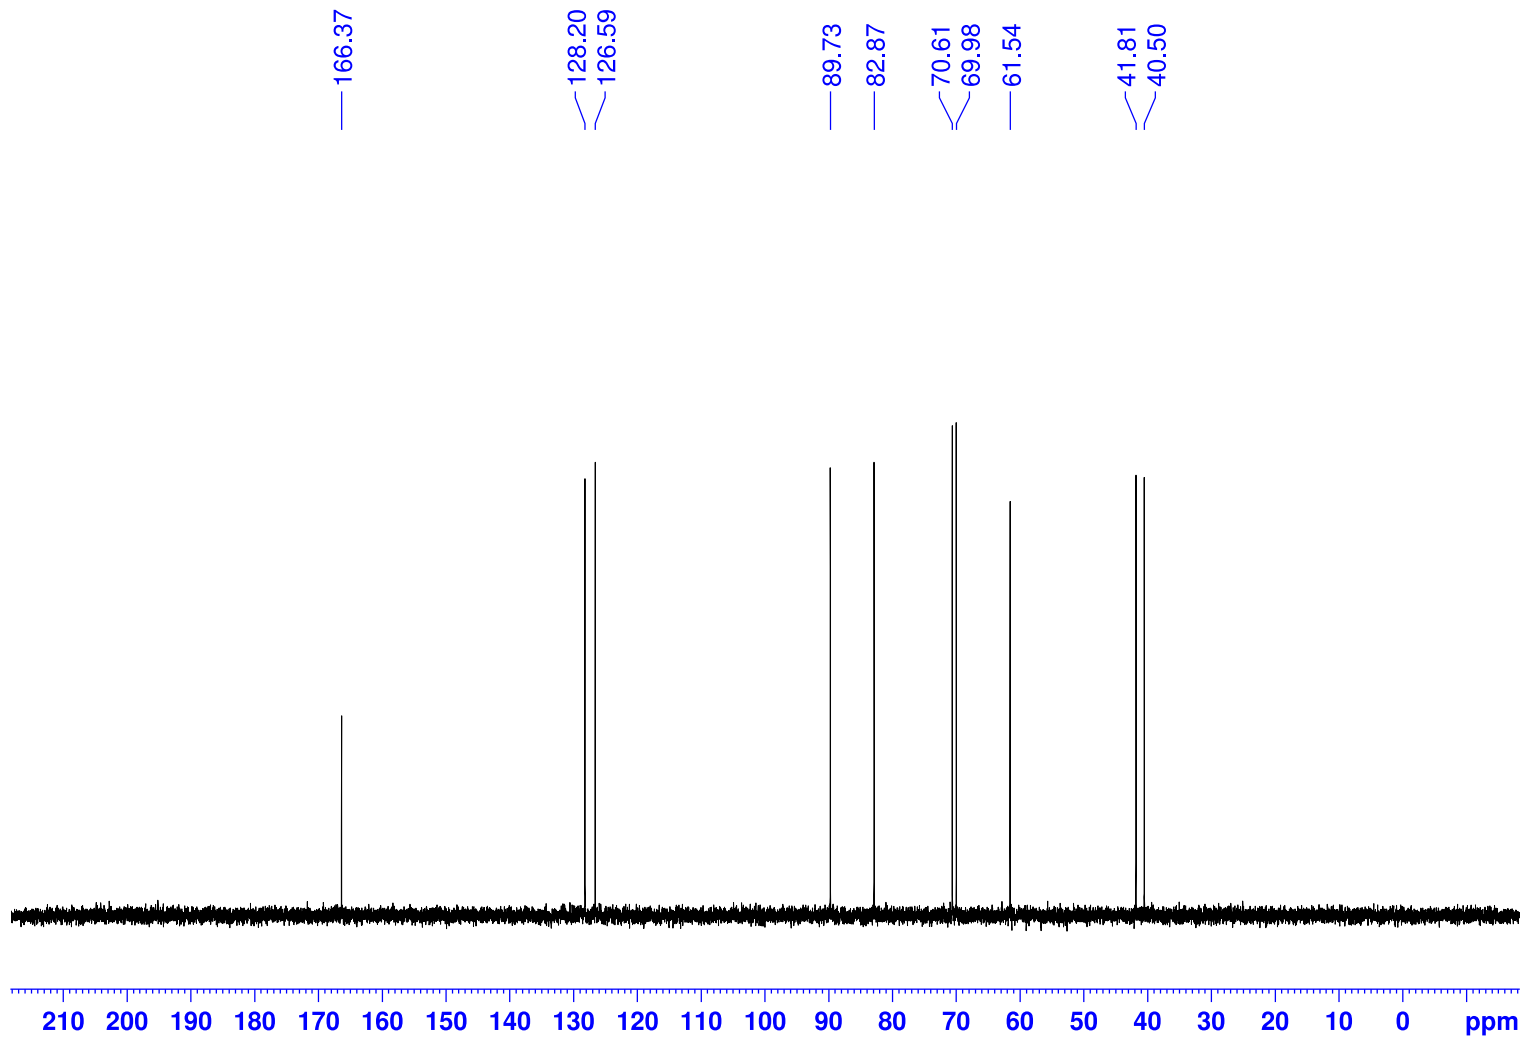

<sup>13</sup>C NMR spectrum of compound 11 (126 MHz, D<sub>2</sub>O)

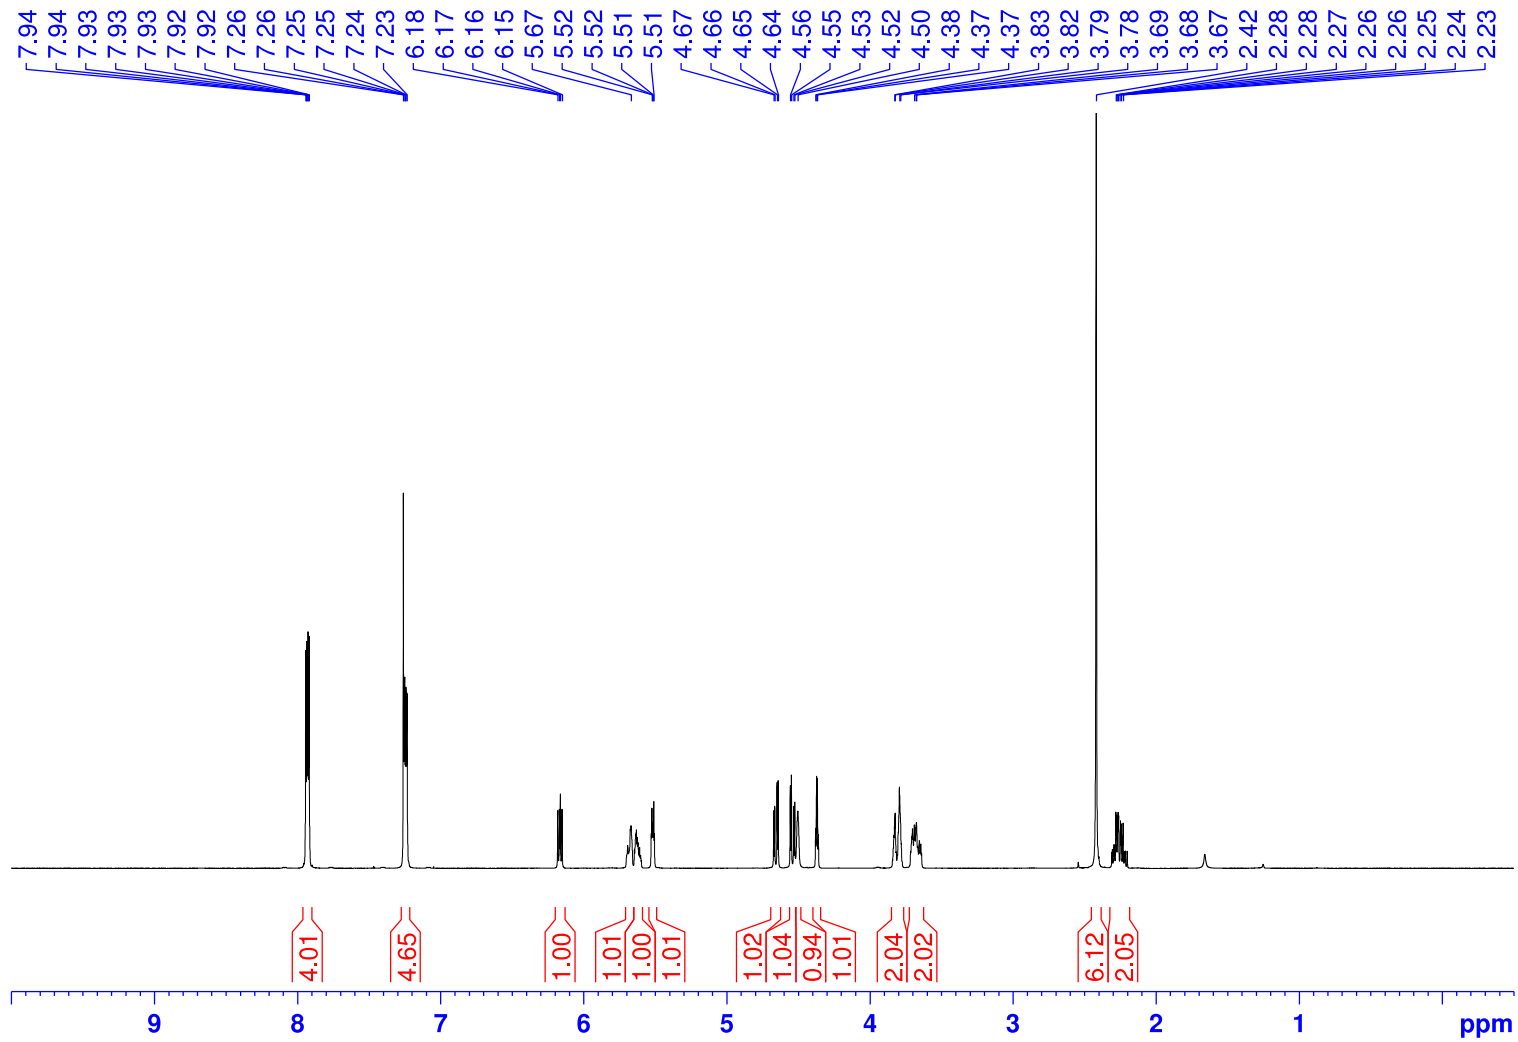

<sup>1</sup>H NMR spectrum of compound 14 (500 MHz, CDCl<sub>3</sub>)

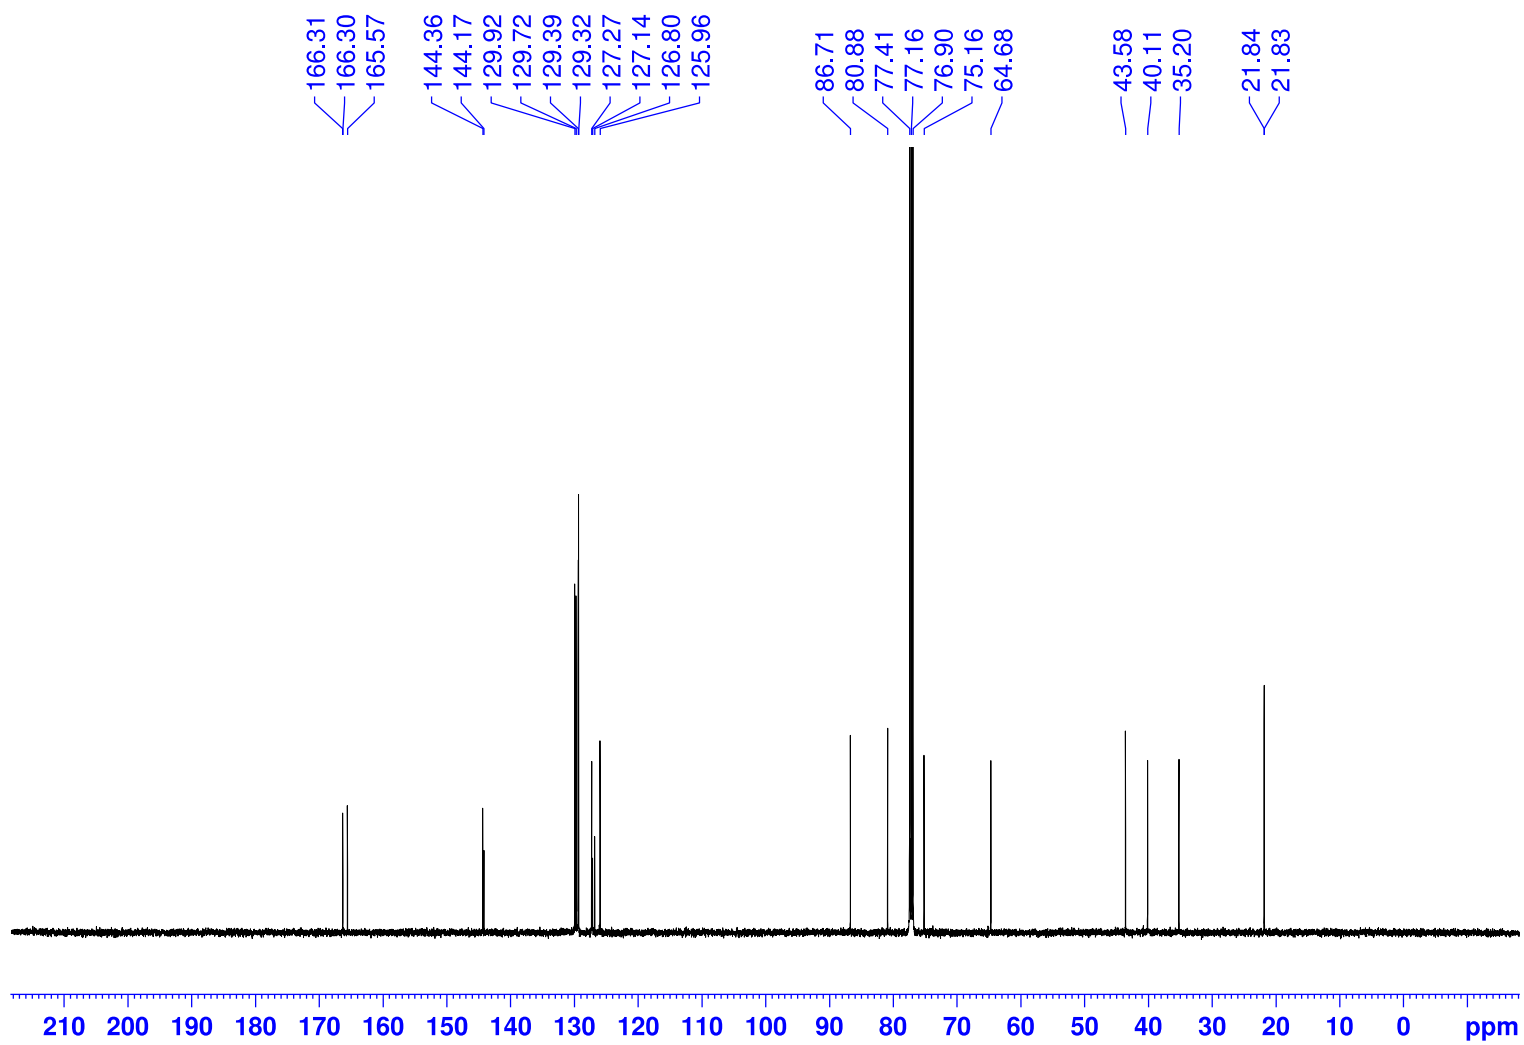

$^{13}\text{C}$  NMR spectrum of compound 14 (126 MHz,  $\text{CDCl}_3$ )



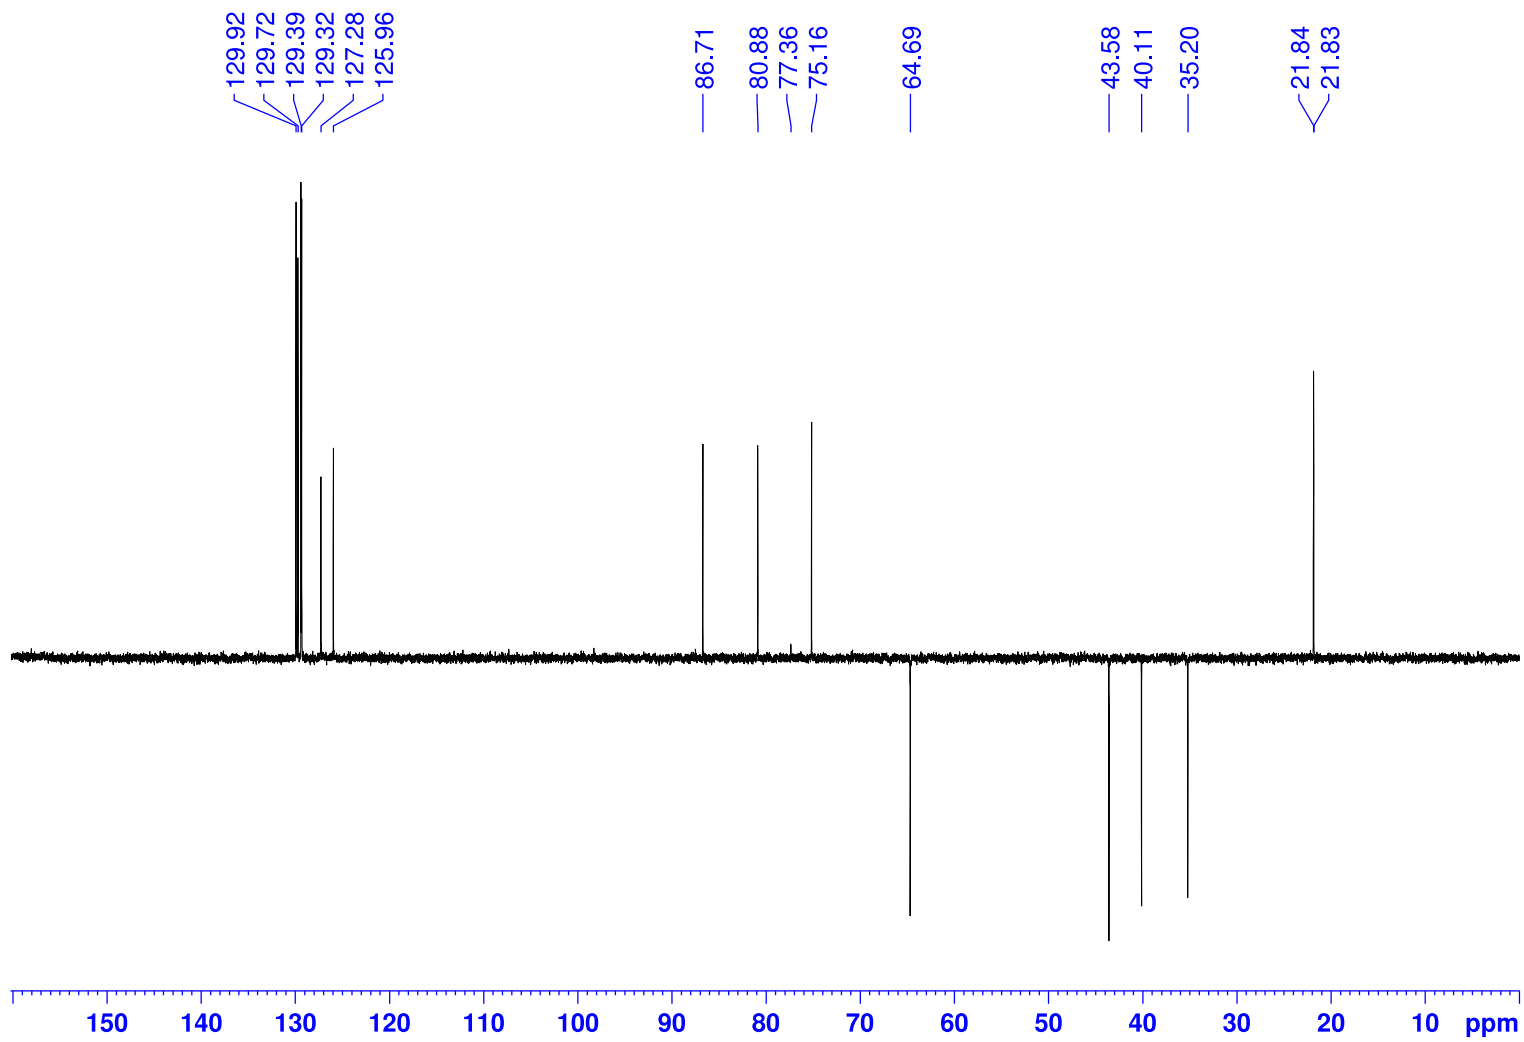

**$^{13}\text{C}$  DEPT-135 NMR spectrum of compound 14 (126 MHz,  $\text{CDCl}_3$ )**

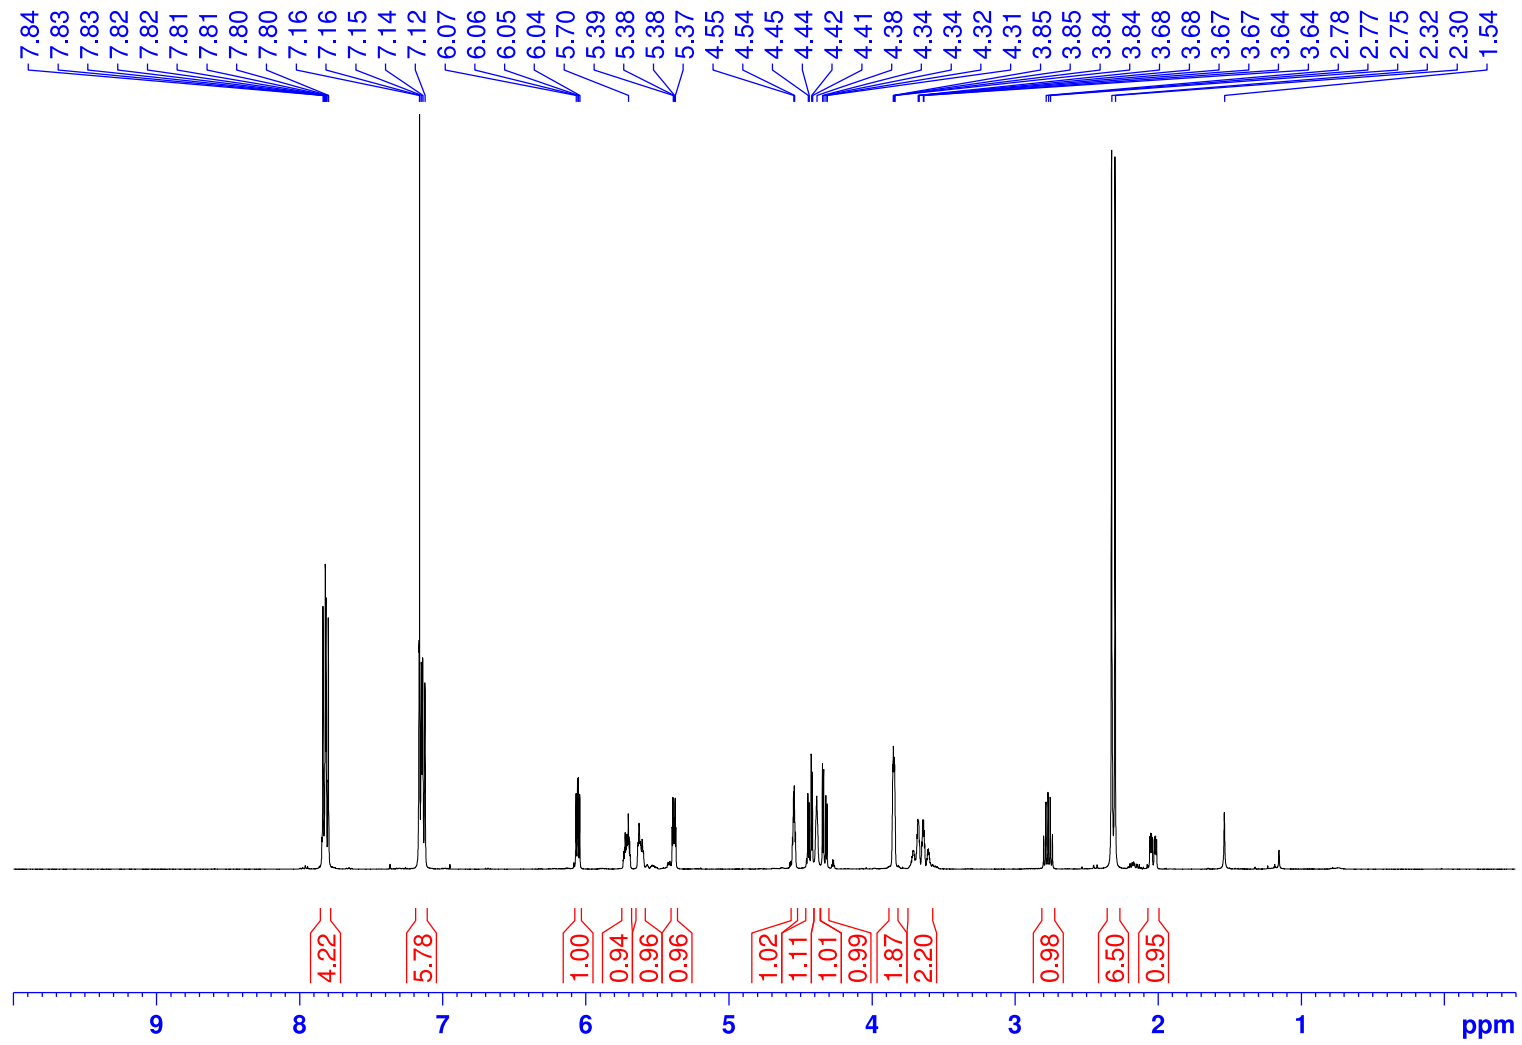

$^1\text{H}$  NMR spectrum of compound 15 (500 MHz,  $\text{CDCl}_3$ )

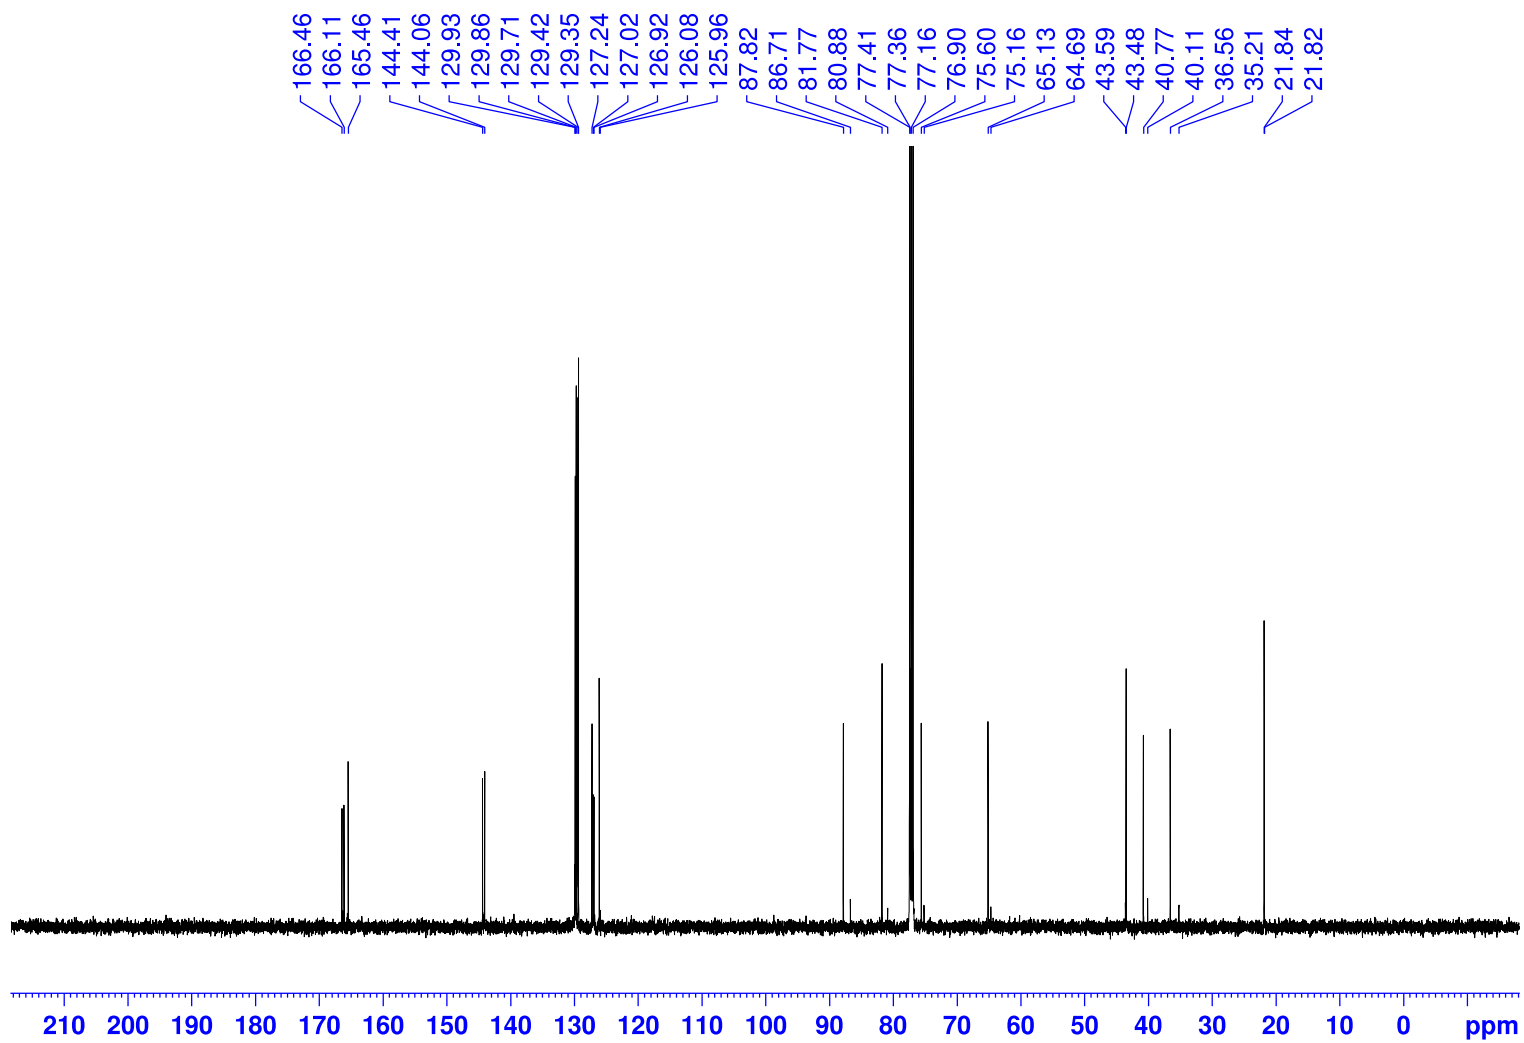

$^{13}\text{C}$  NMR spectrum of compound 15 (126 MHz,  $\text{CDCl}_3$ )

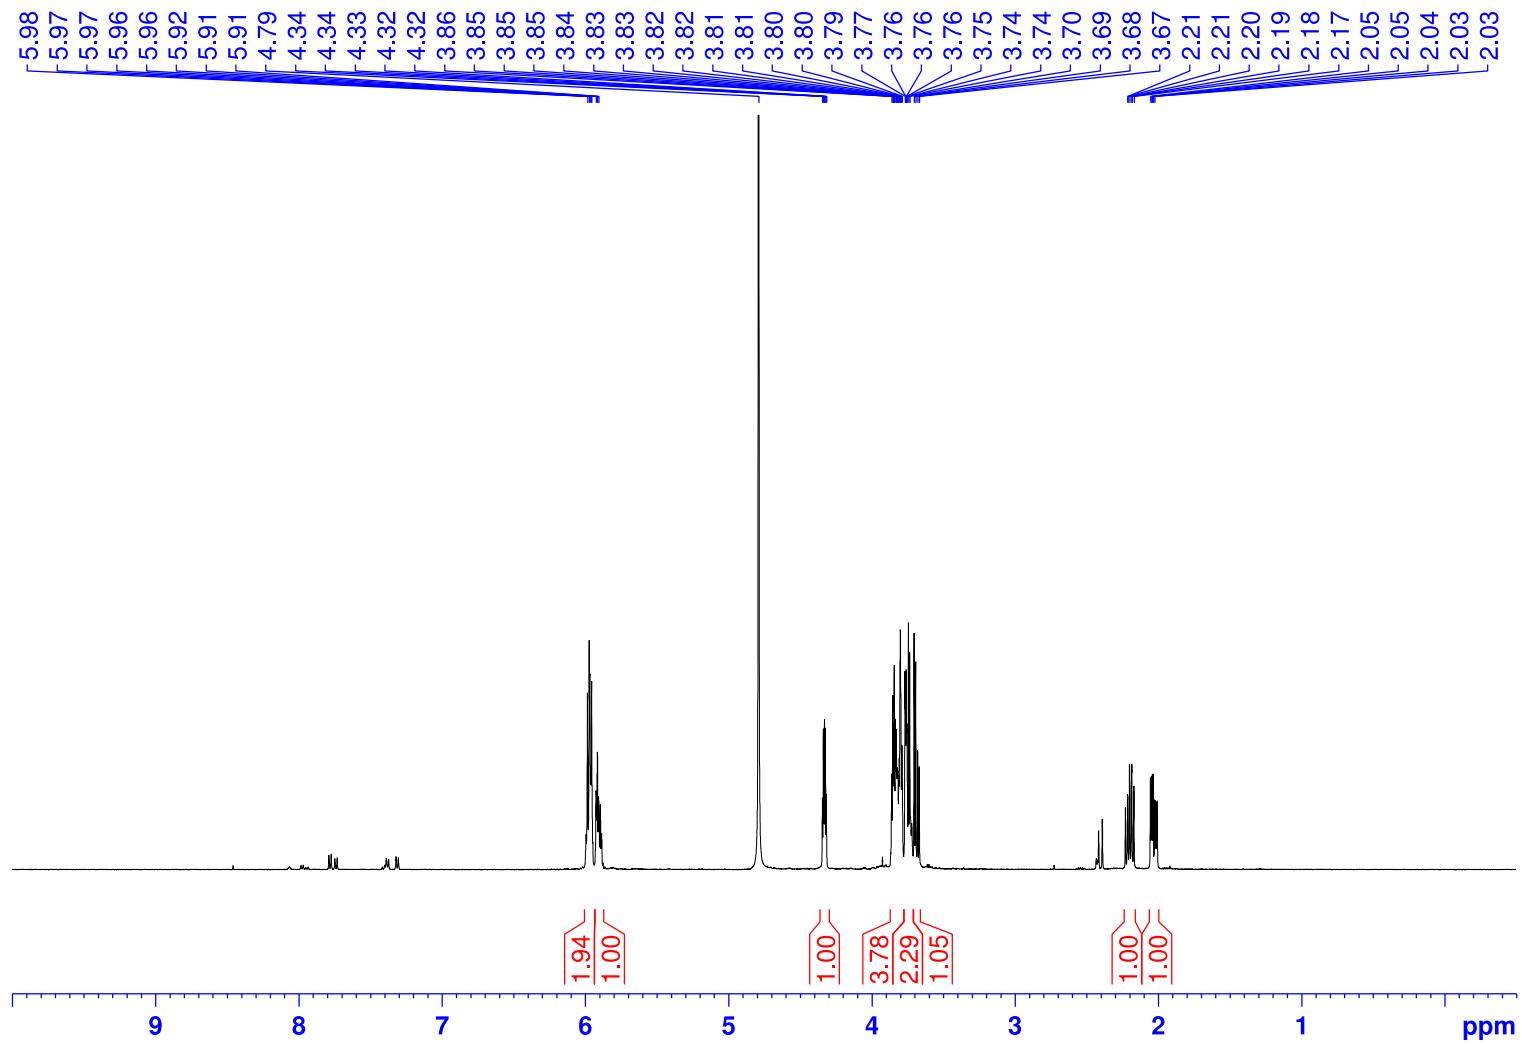

$^1\text{H}$  NMR spectrum of compound 16 (500 MHz,  $\text{D}_2\text{O}$ )

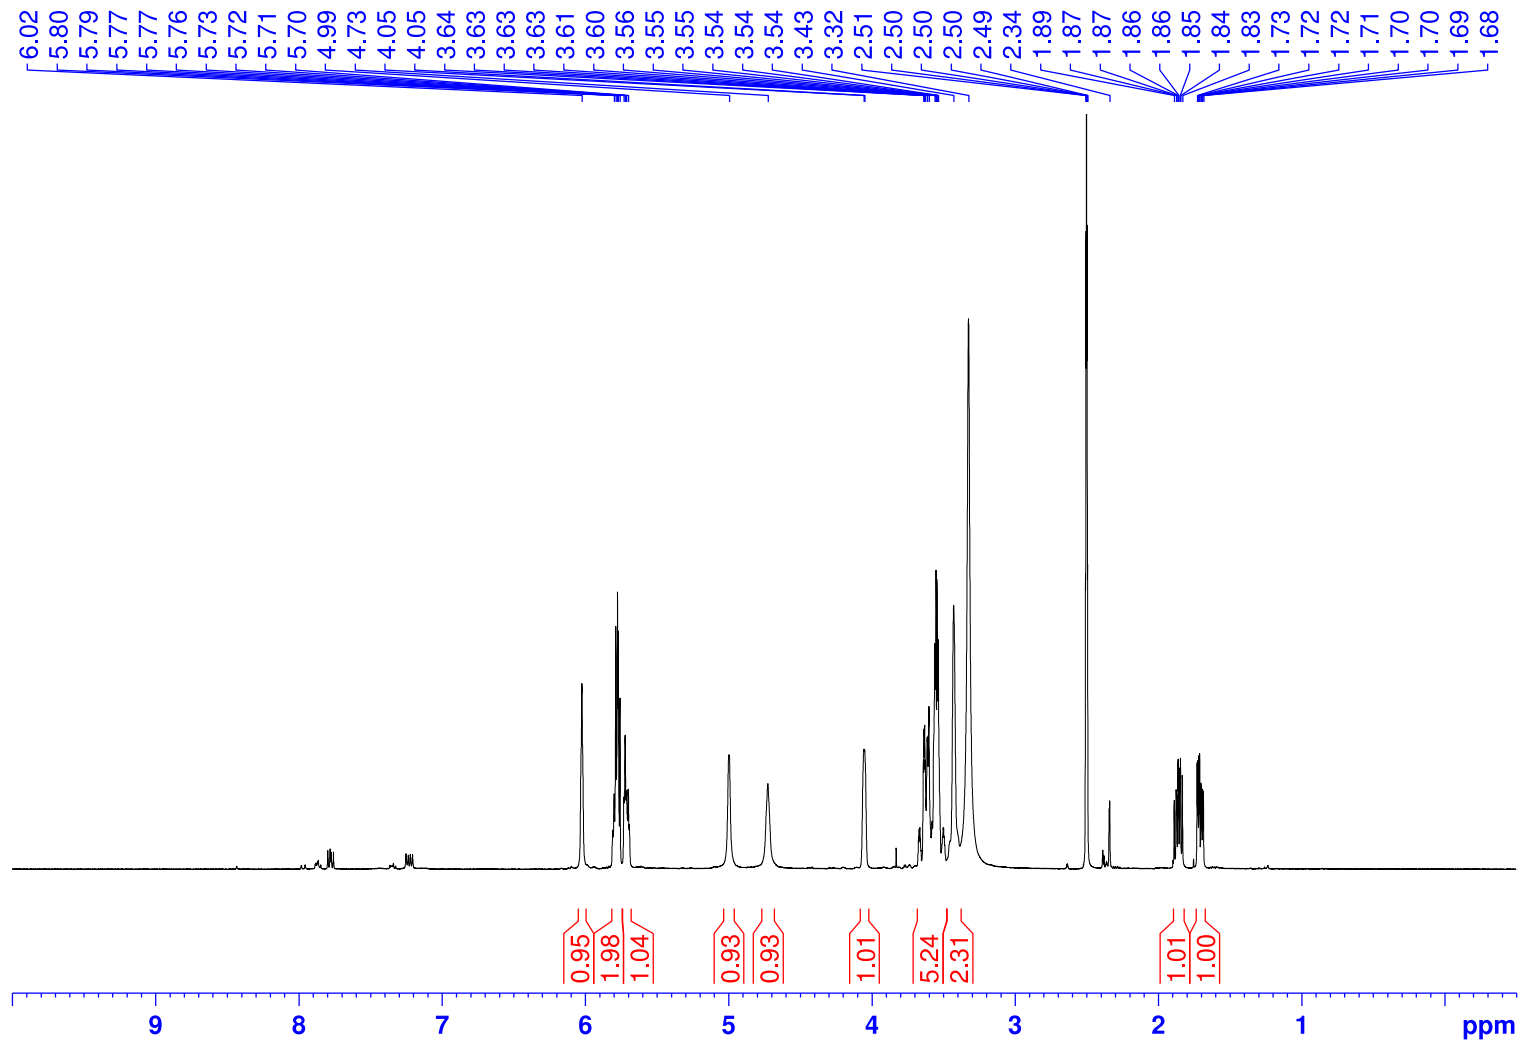

<sup>1</sup>H NMR spectrum of compound 16 (500 MHz, DMSO-d<sub>6</sub>)

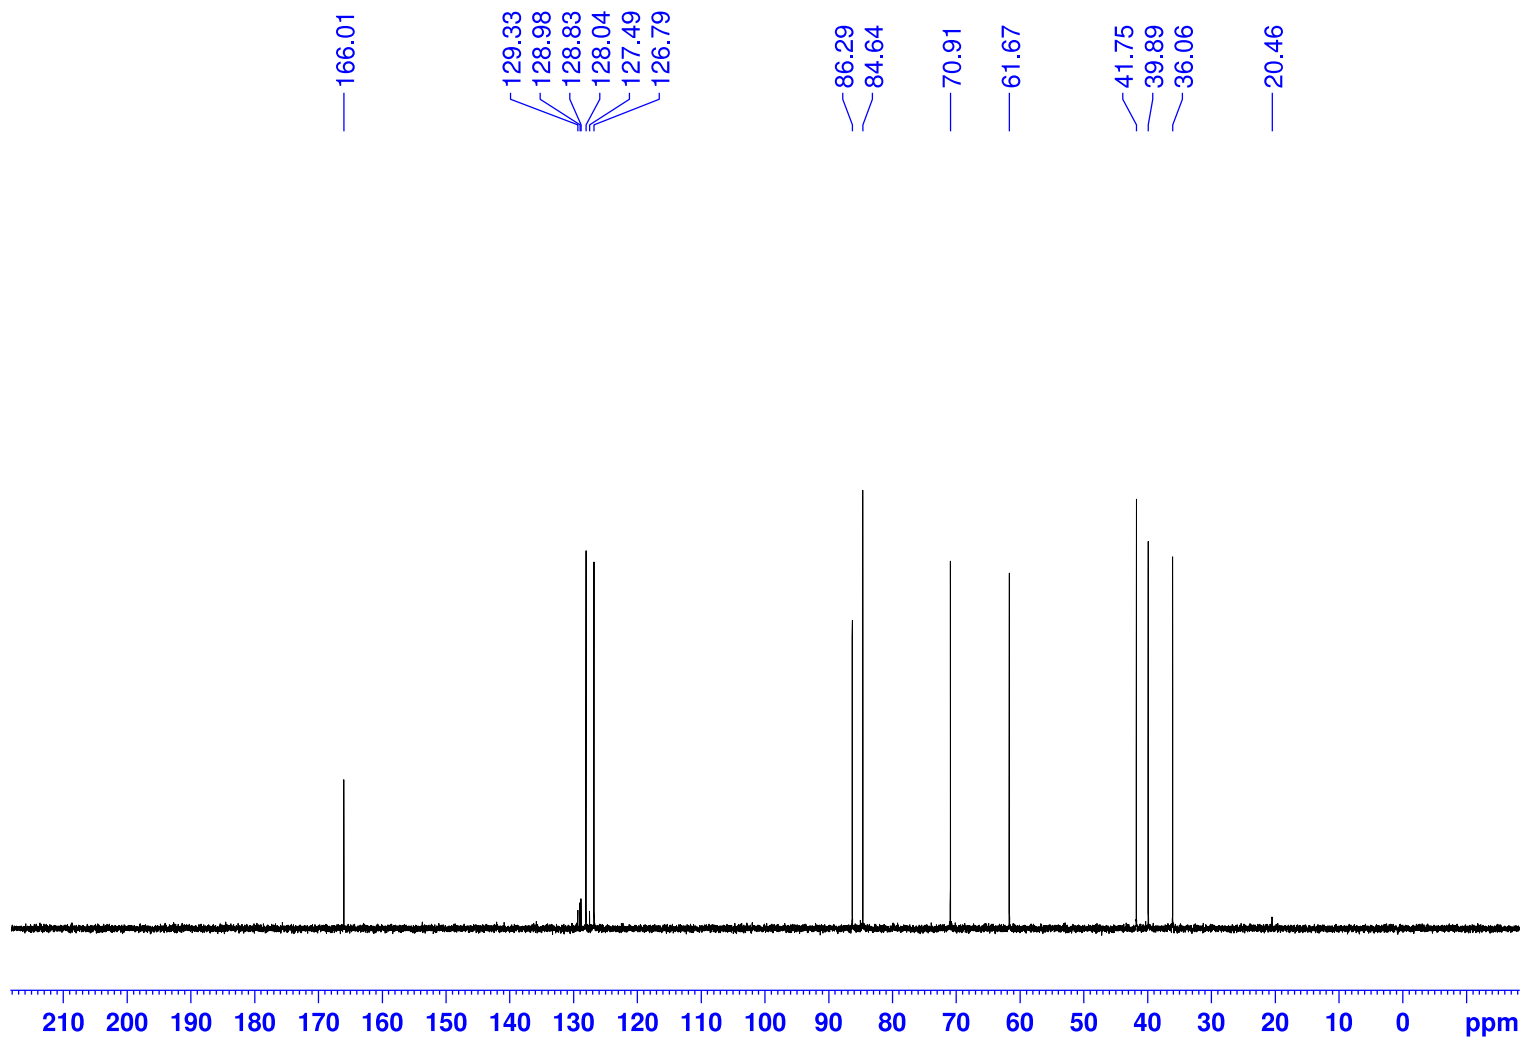

$^{13}\text{C}$  NMR spectrum of compound 16 (126 MHz,  $\text{D}_2\text{O}$ )

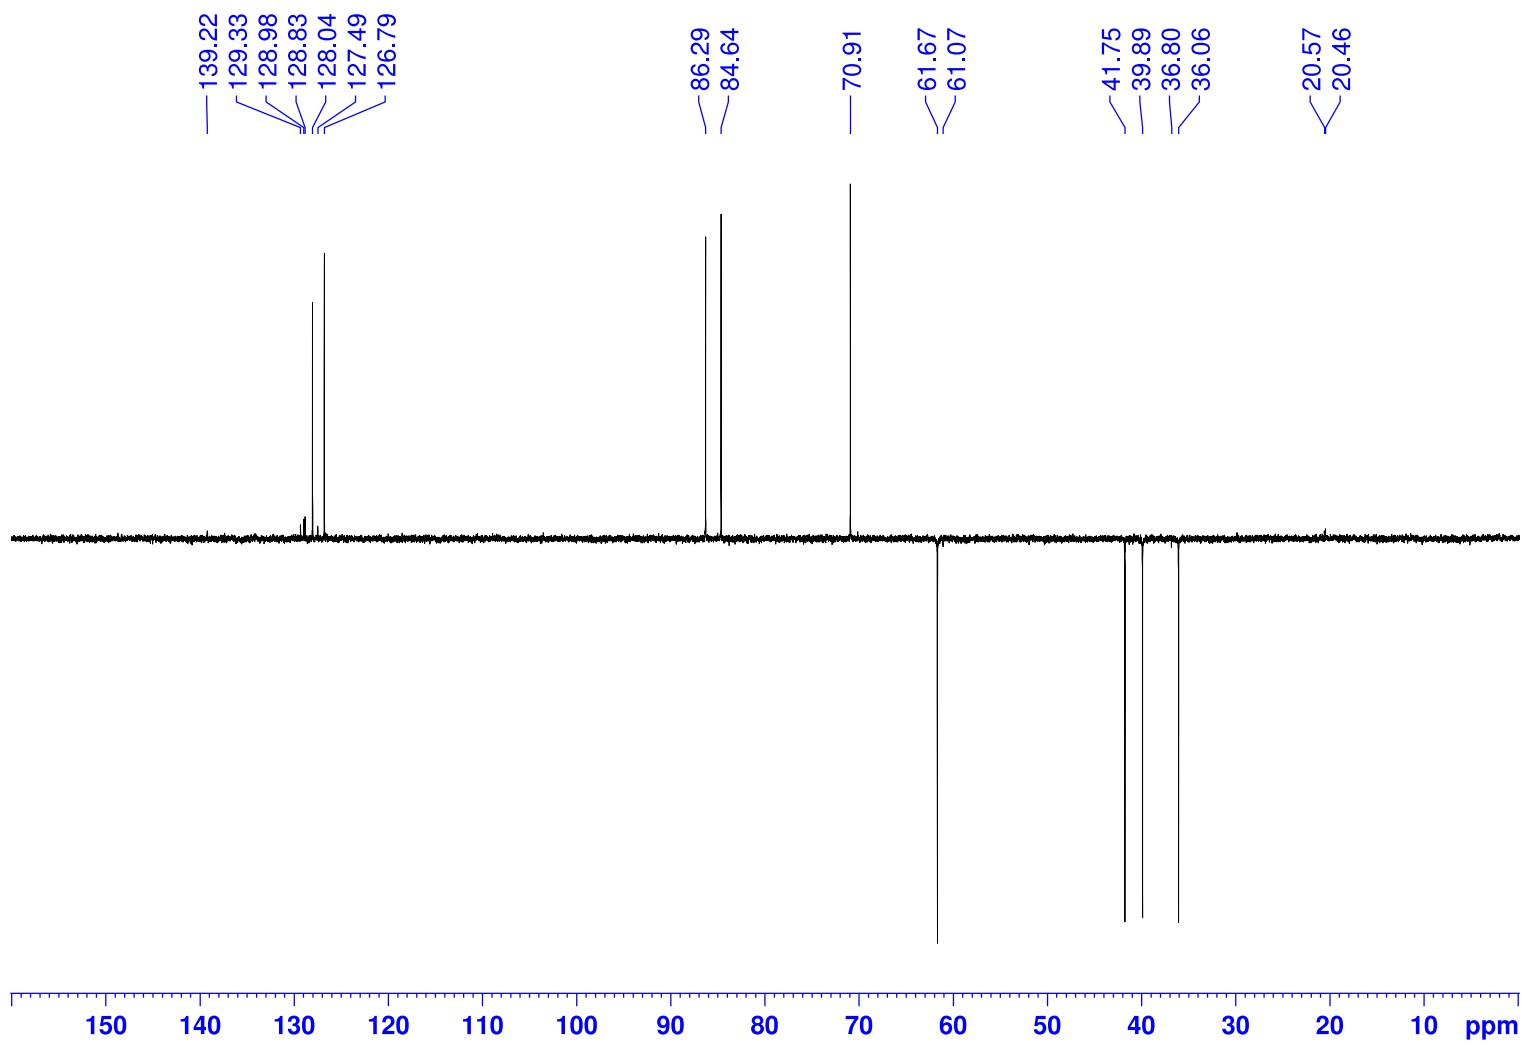

**<sup>13</sup>C DEPT-135 NMR spectrum of compound 16 (126 MHz, D<sub>2</sub>O)**

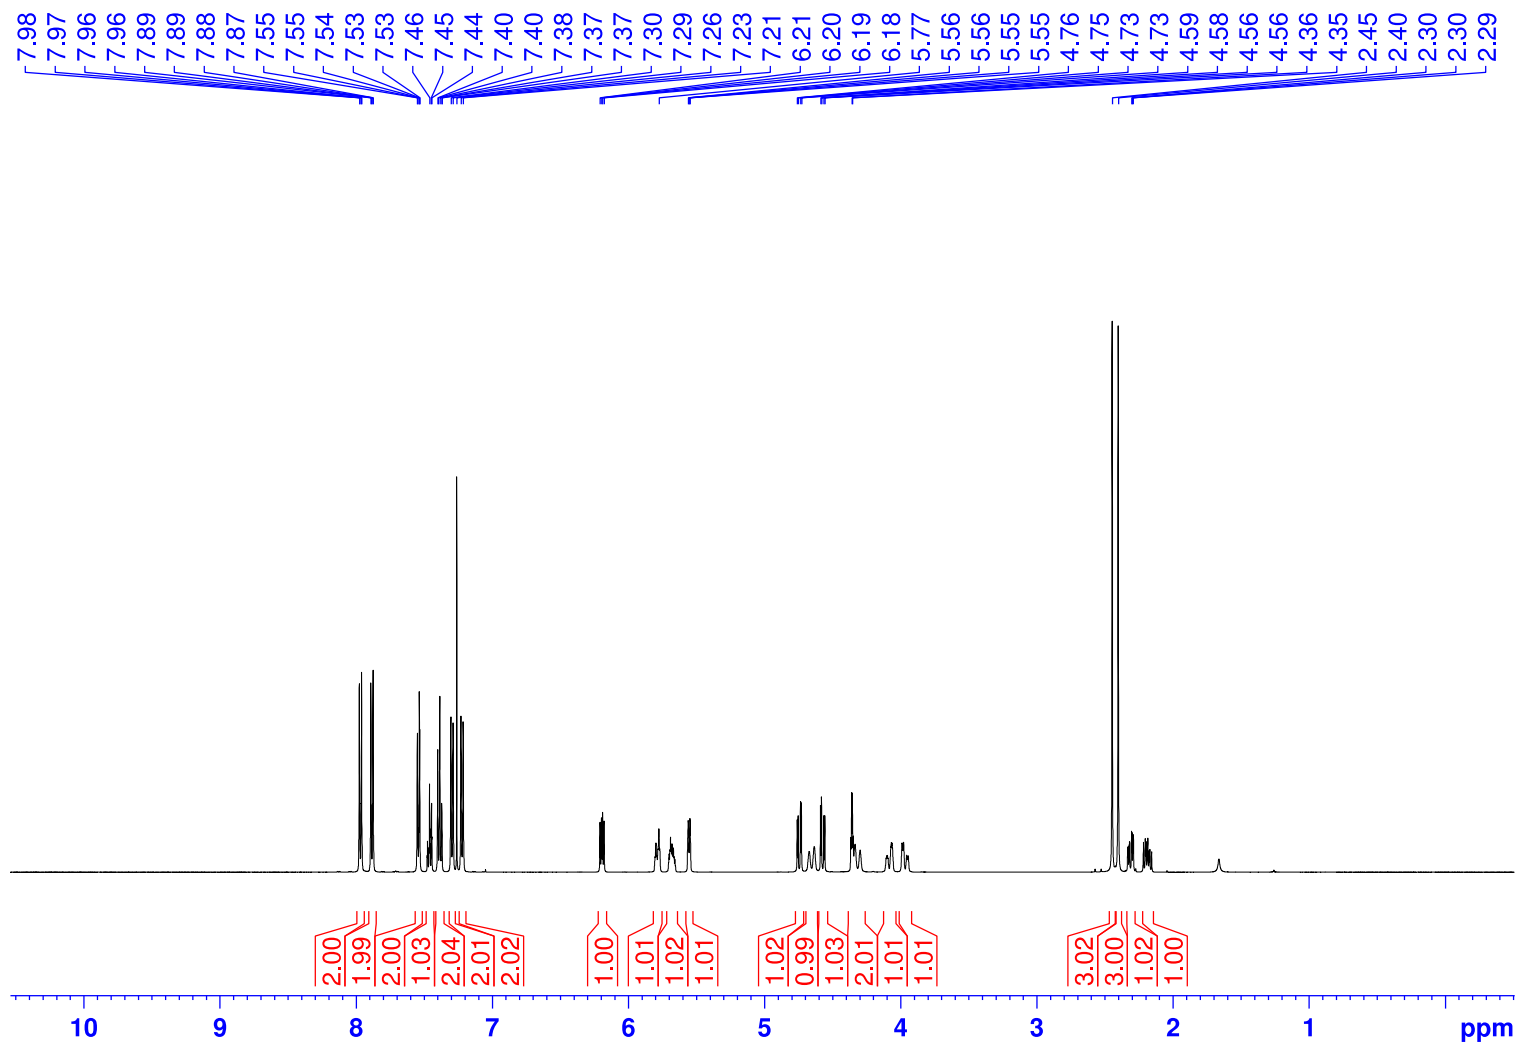

<sup>1</sup>H NMR spectrum of compound 17 (500 MHz, CDCl<sub>3</sub>)



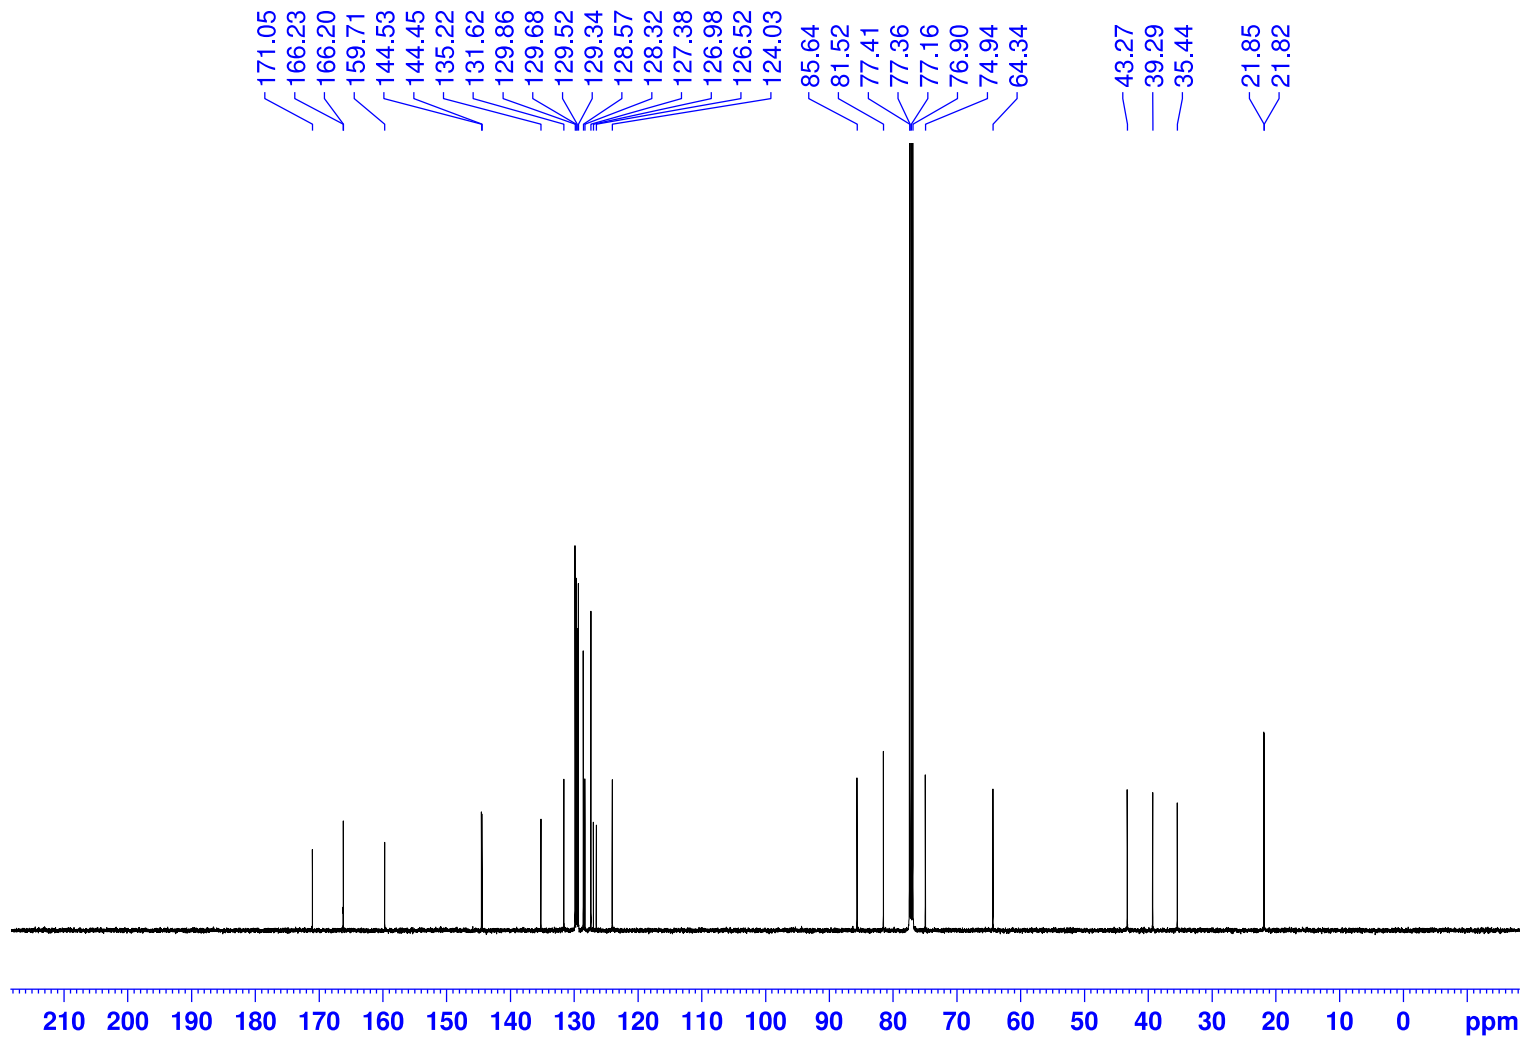

$^{13}\text{C}$  NMR spectrum of compound 17 (126 MHz,  $\text{CDCl}_3$ )

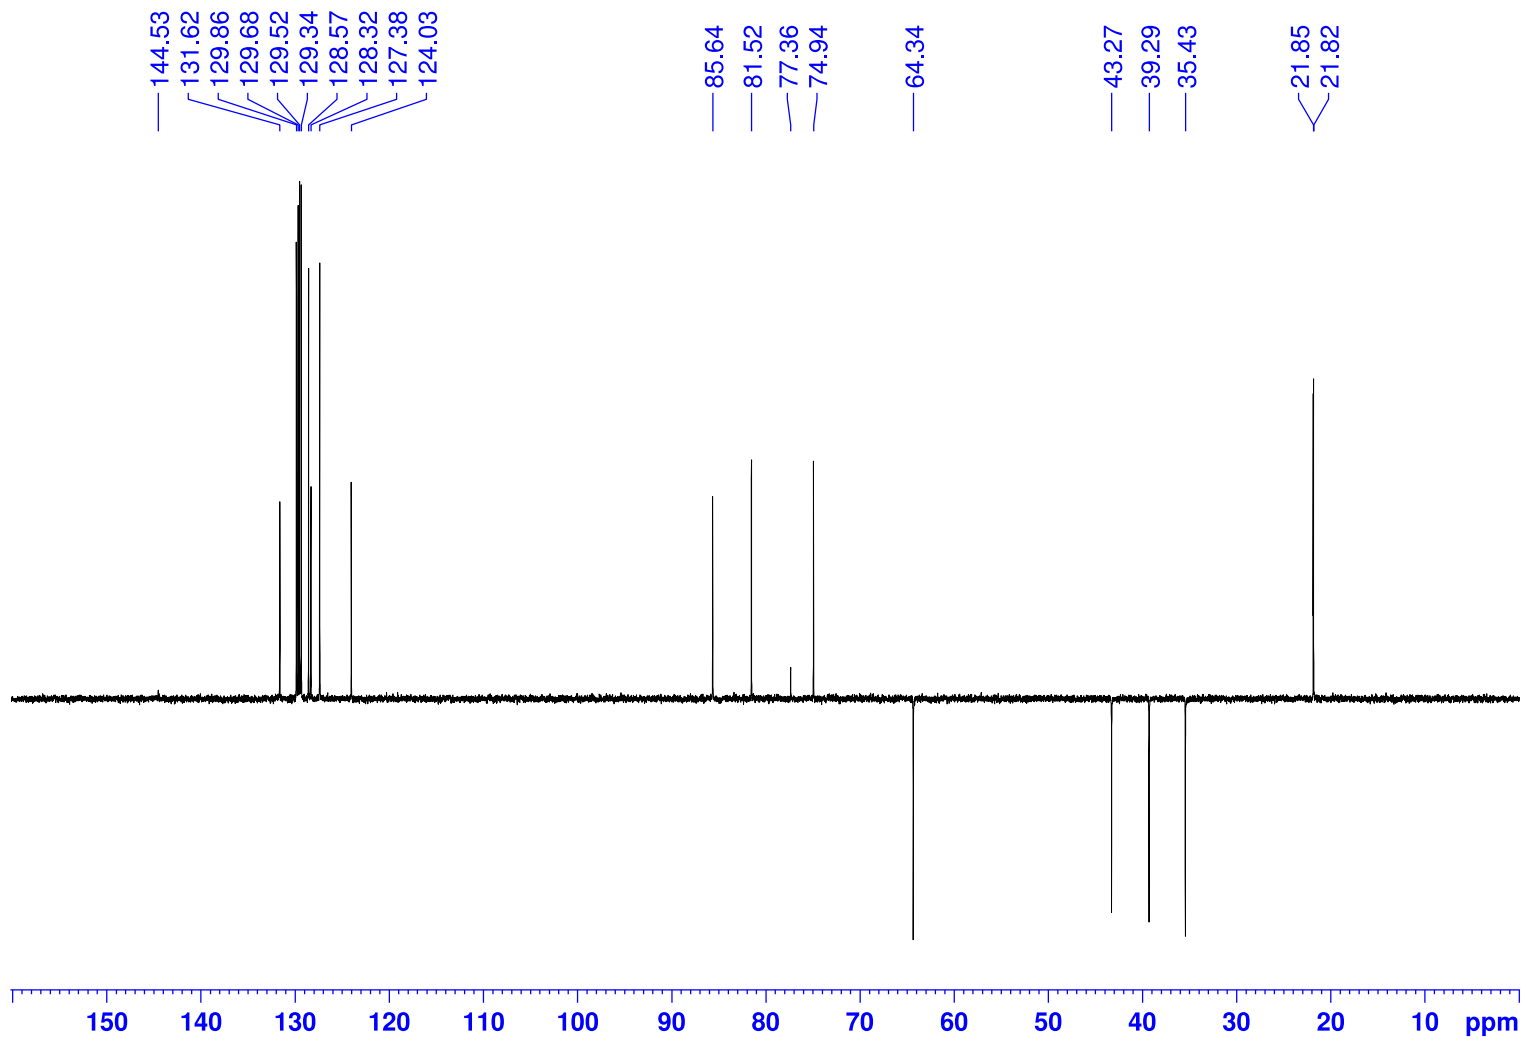

**$^{13}\text{C}$  DEPT-135 NMR spectrum of compound 17 (126 MHz,  $\text{CDCl}_3$ )**

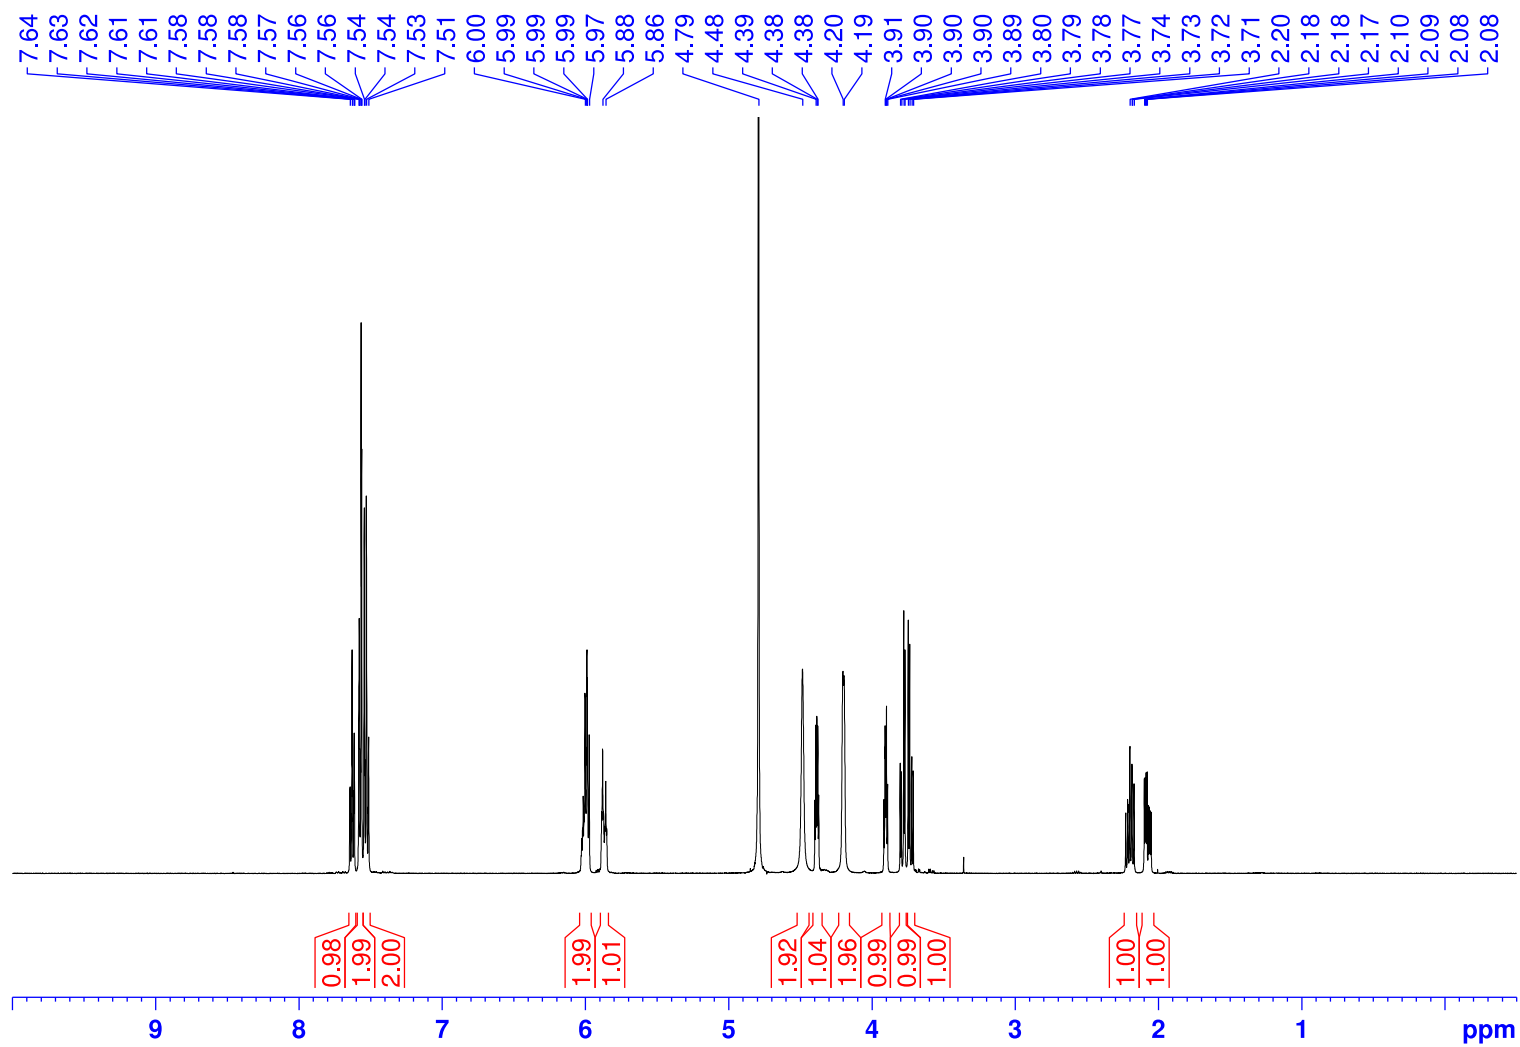

**<sup>1</sup>H NMR spectrum of compound 18 (500 MHz, D<sub>2</sub>O)**

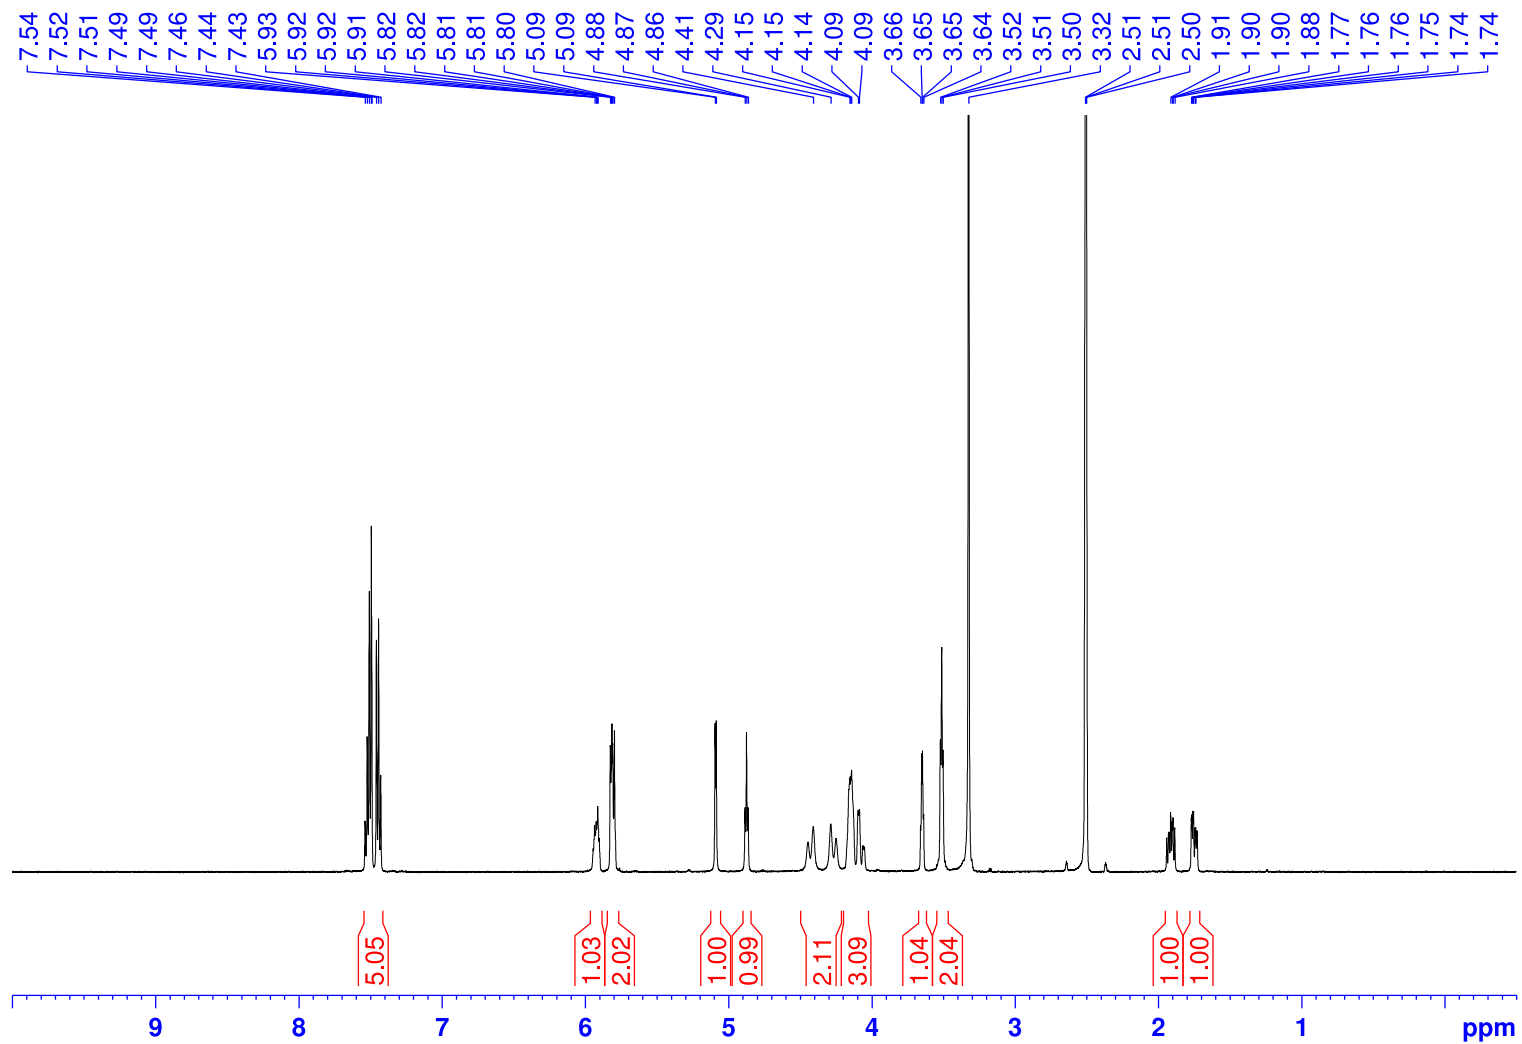

<sup>1</sup>H NMR spectrum of compound 18 (500 MHz, DMSO-d<sub>6</sub>)

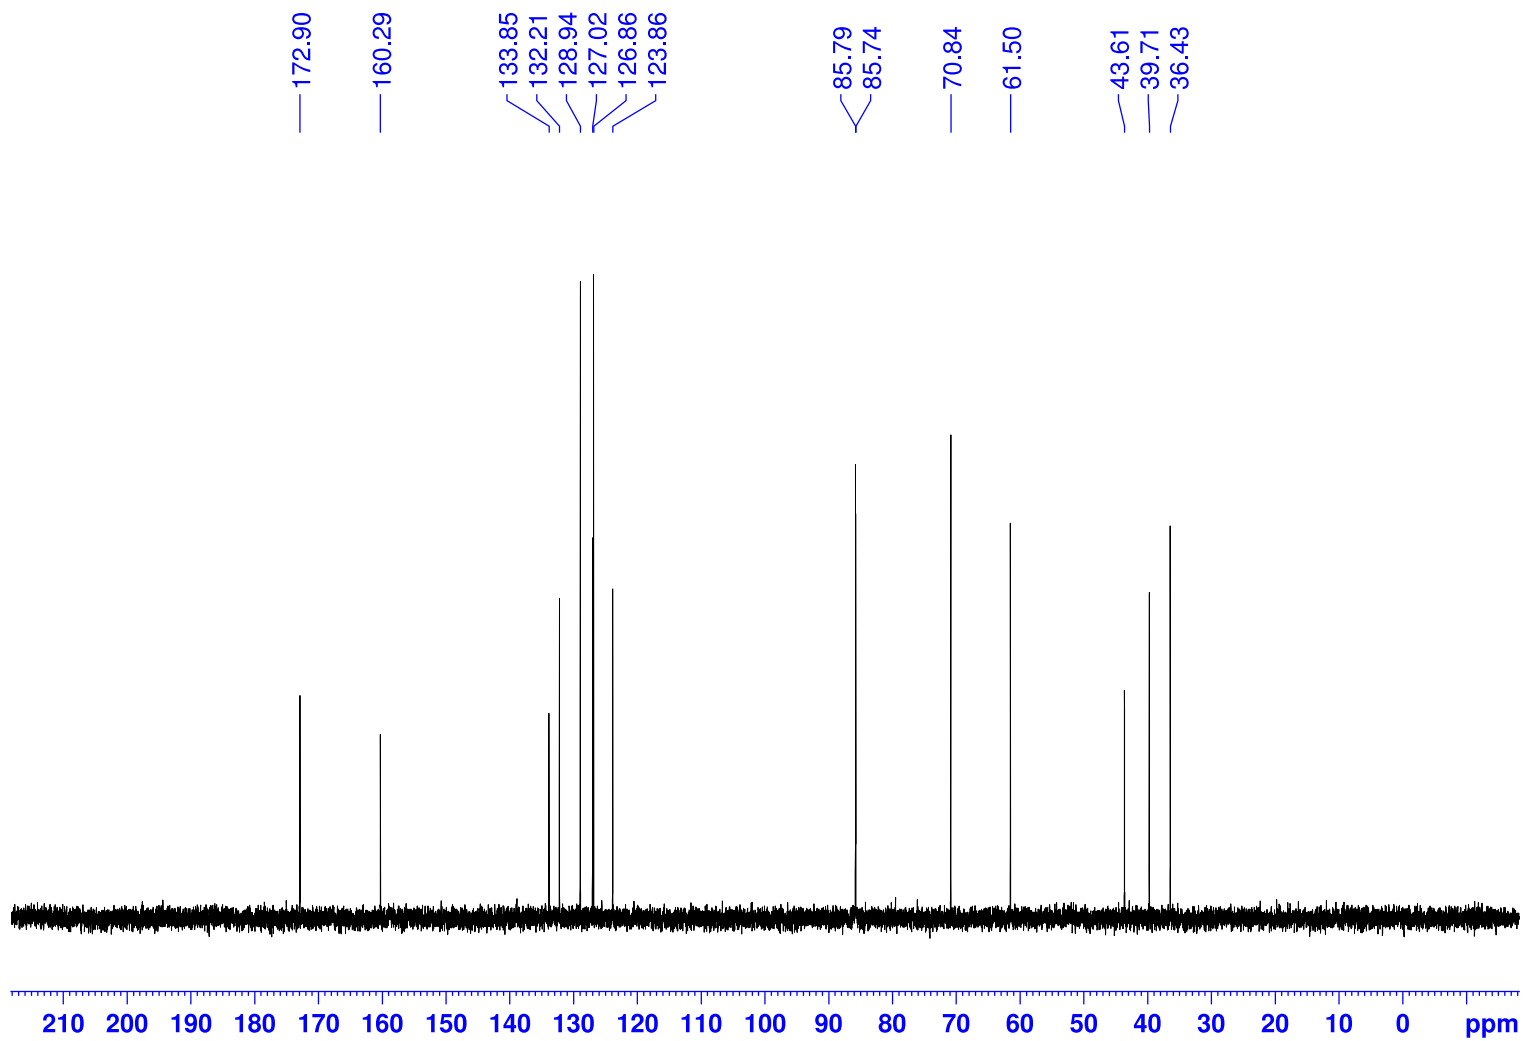

$^{13}\text{C}$  NMR spectrum of compound 18 (126 MHz,  $\text{D}_2\text{O}$ )

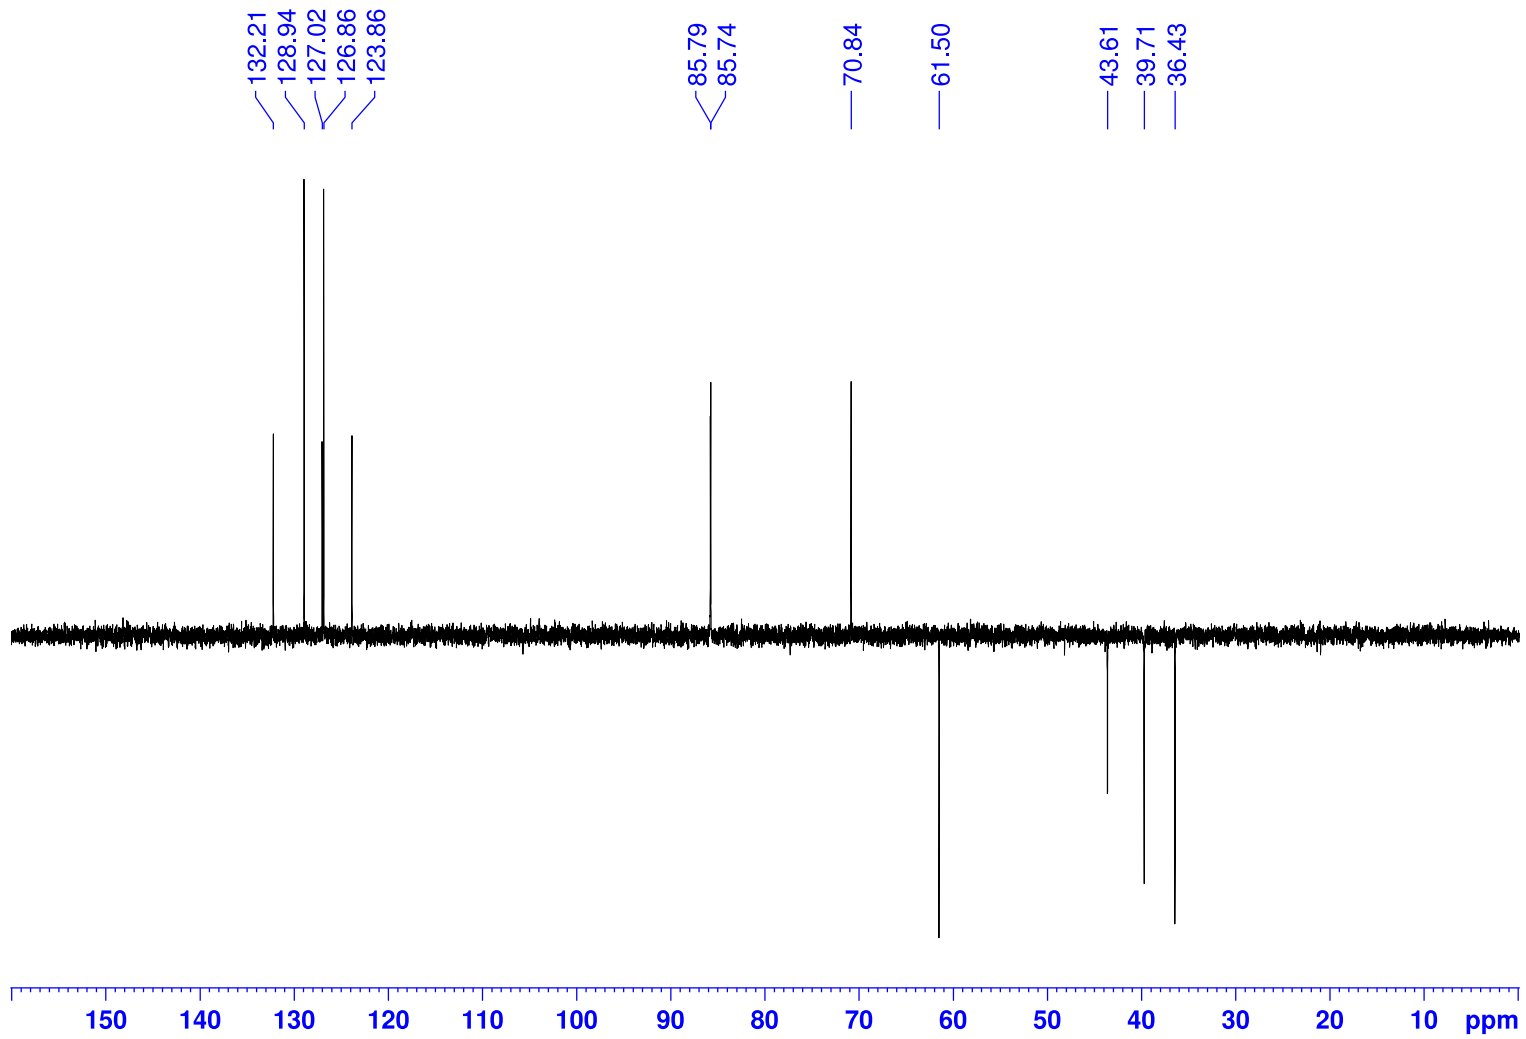

**<sup>13</sup>C DEPT-135 NMR spectrum of compound 18 (126 MHz, D<sub>2</sub>O)**

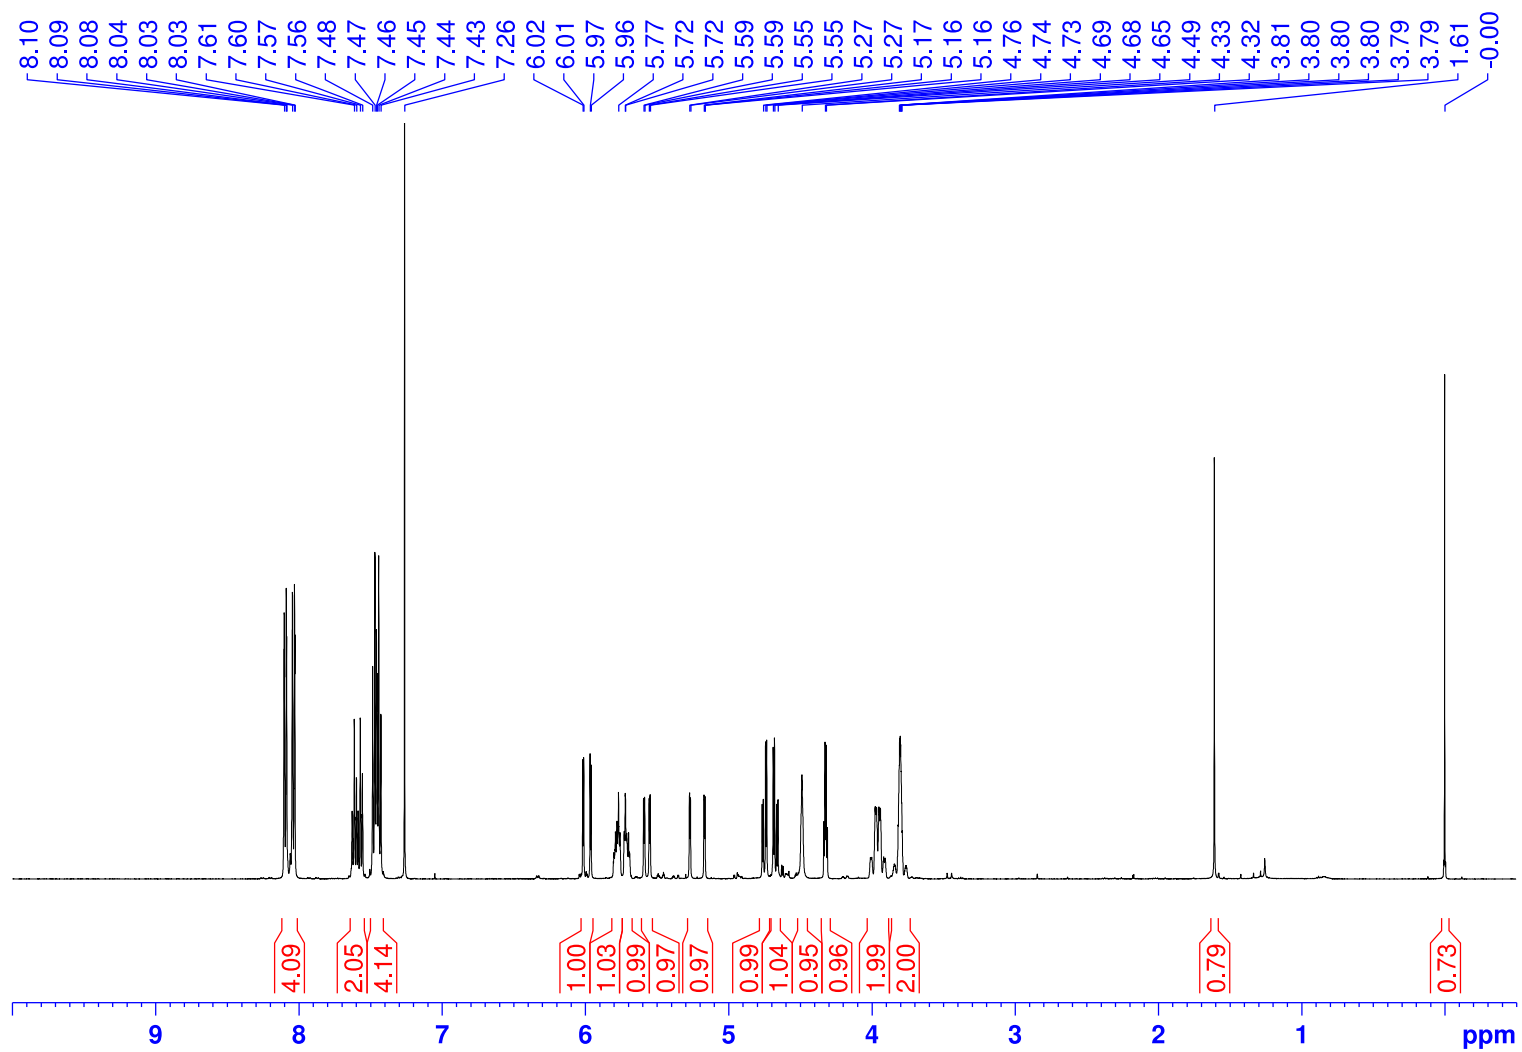

$^1\text{H}$  NMR spectrum of compound 20 (500 MHz,  $\text{CDCl}_3$ )

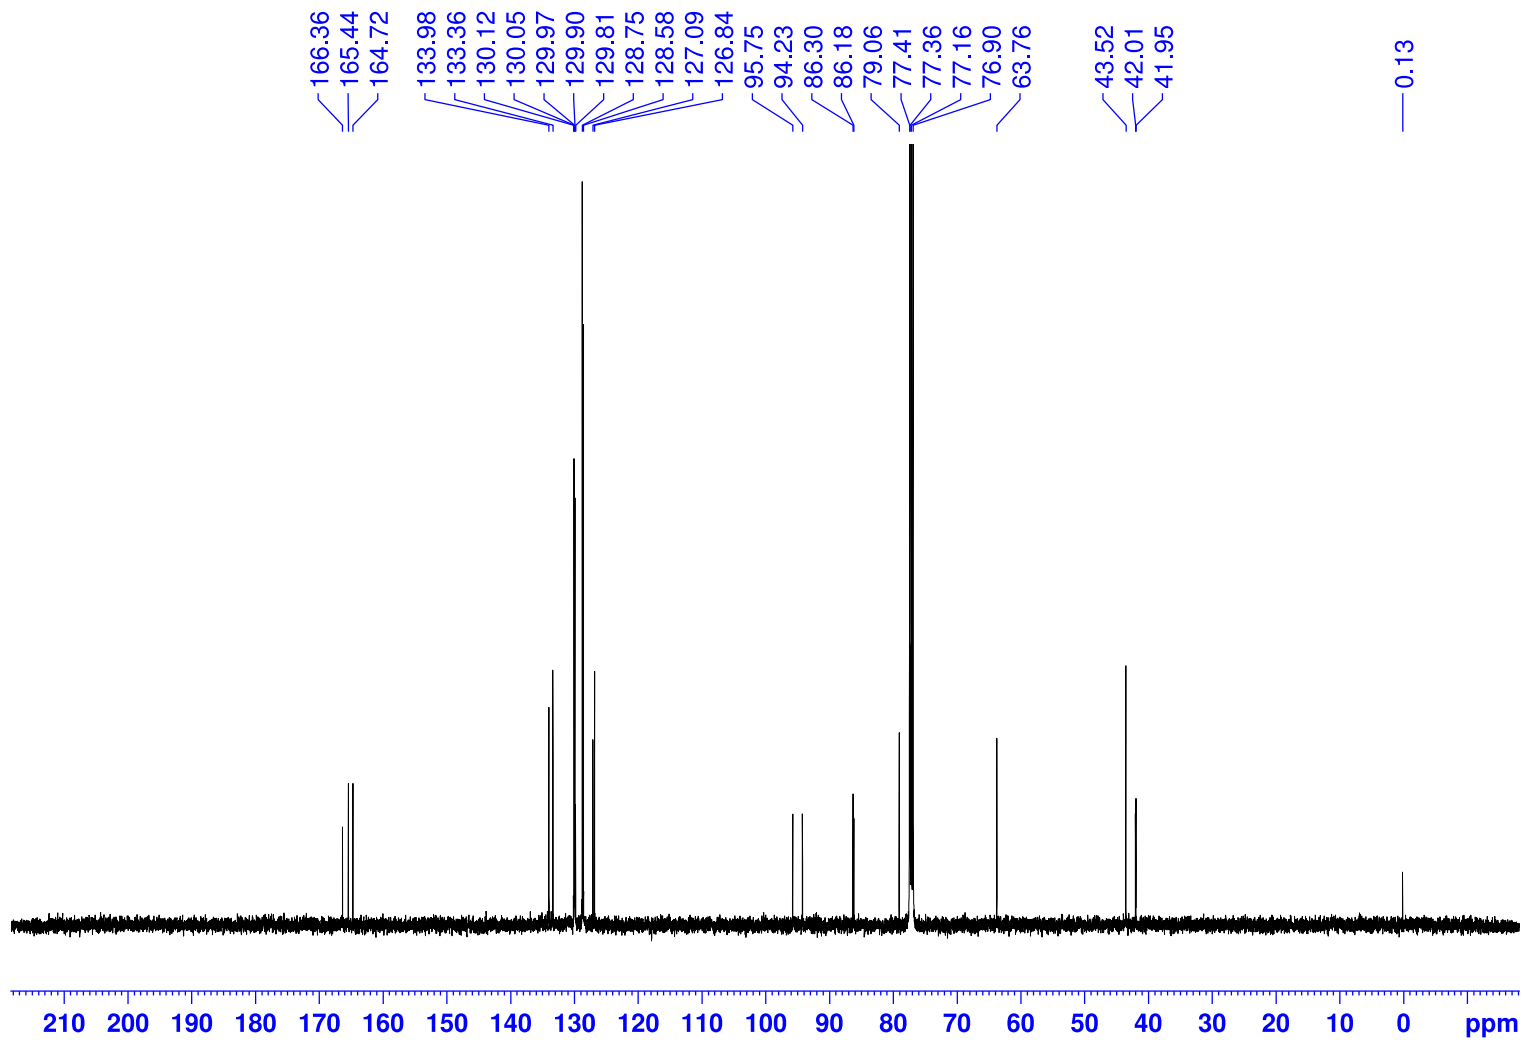

$^{13}\text{C}$  NMR spectrum of compound 20 (126 MHz,  $\text{CDCl}_3$ )



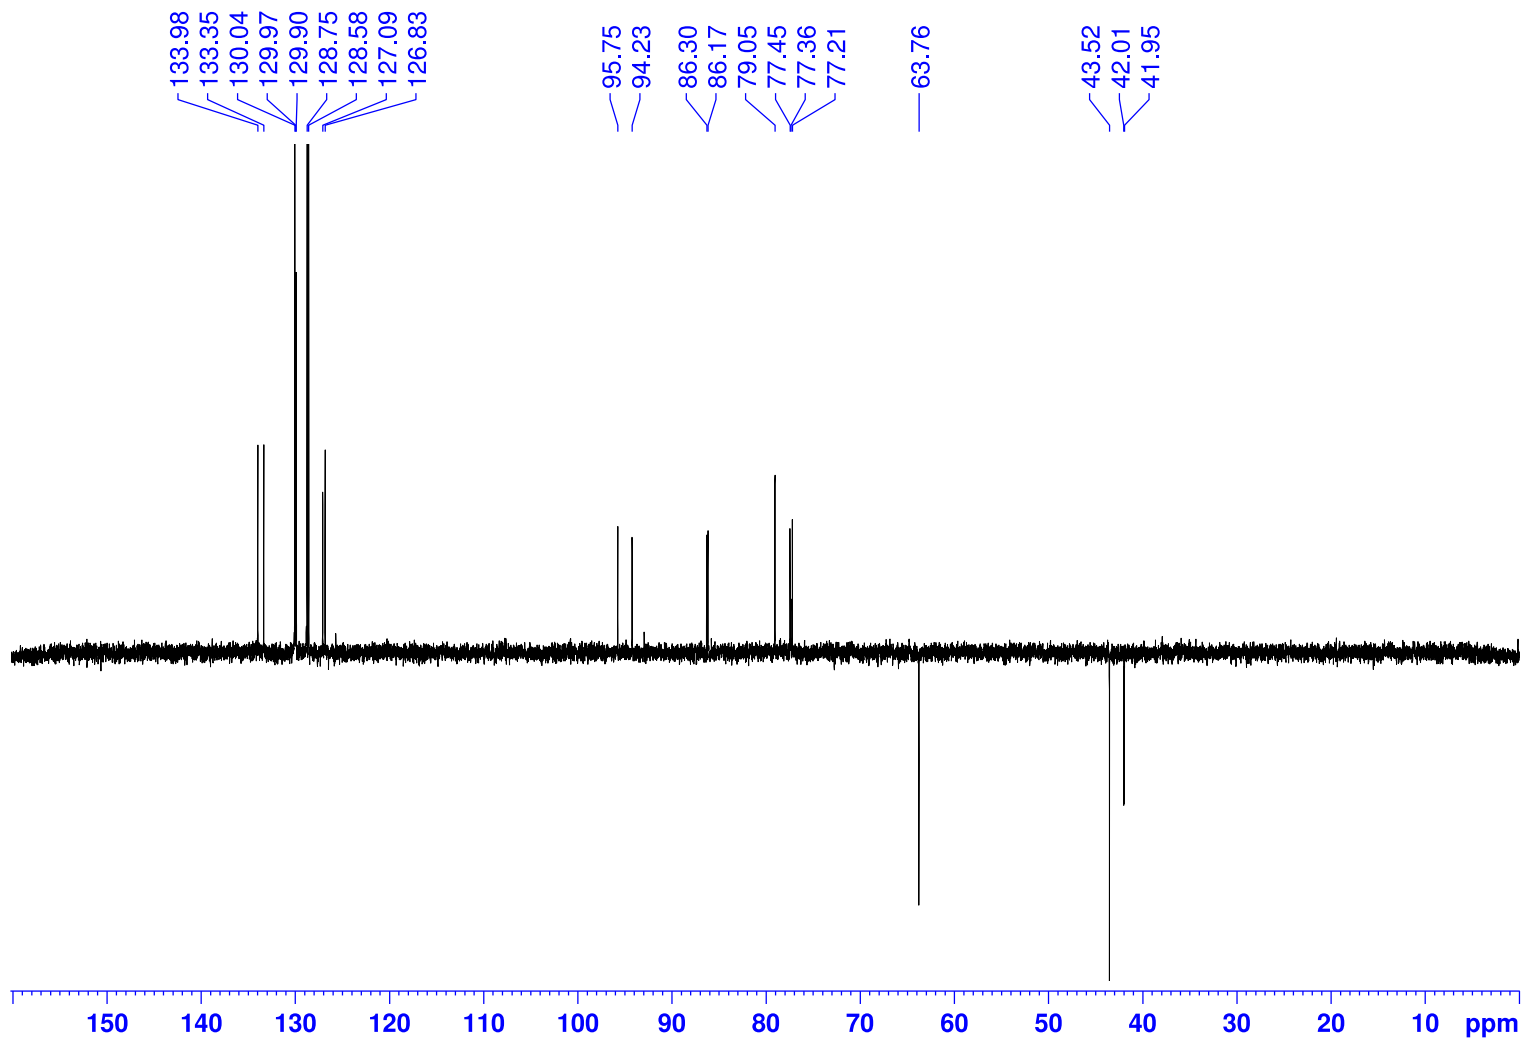

$^{13}\text{C}$  DEPT-135 NMR spectrum of compound 20 (126 MHz,  $\text{CDCl}_3$ )

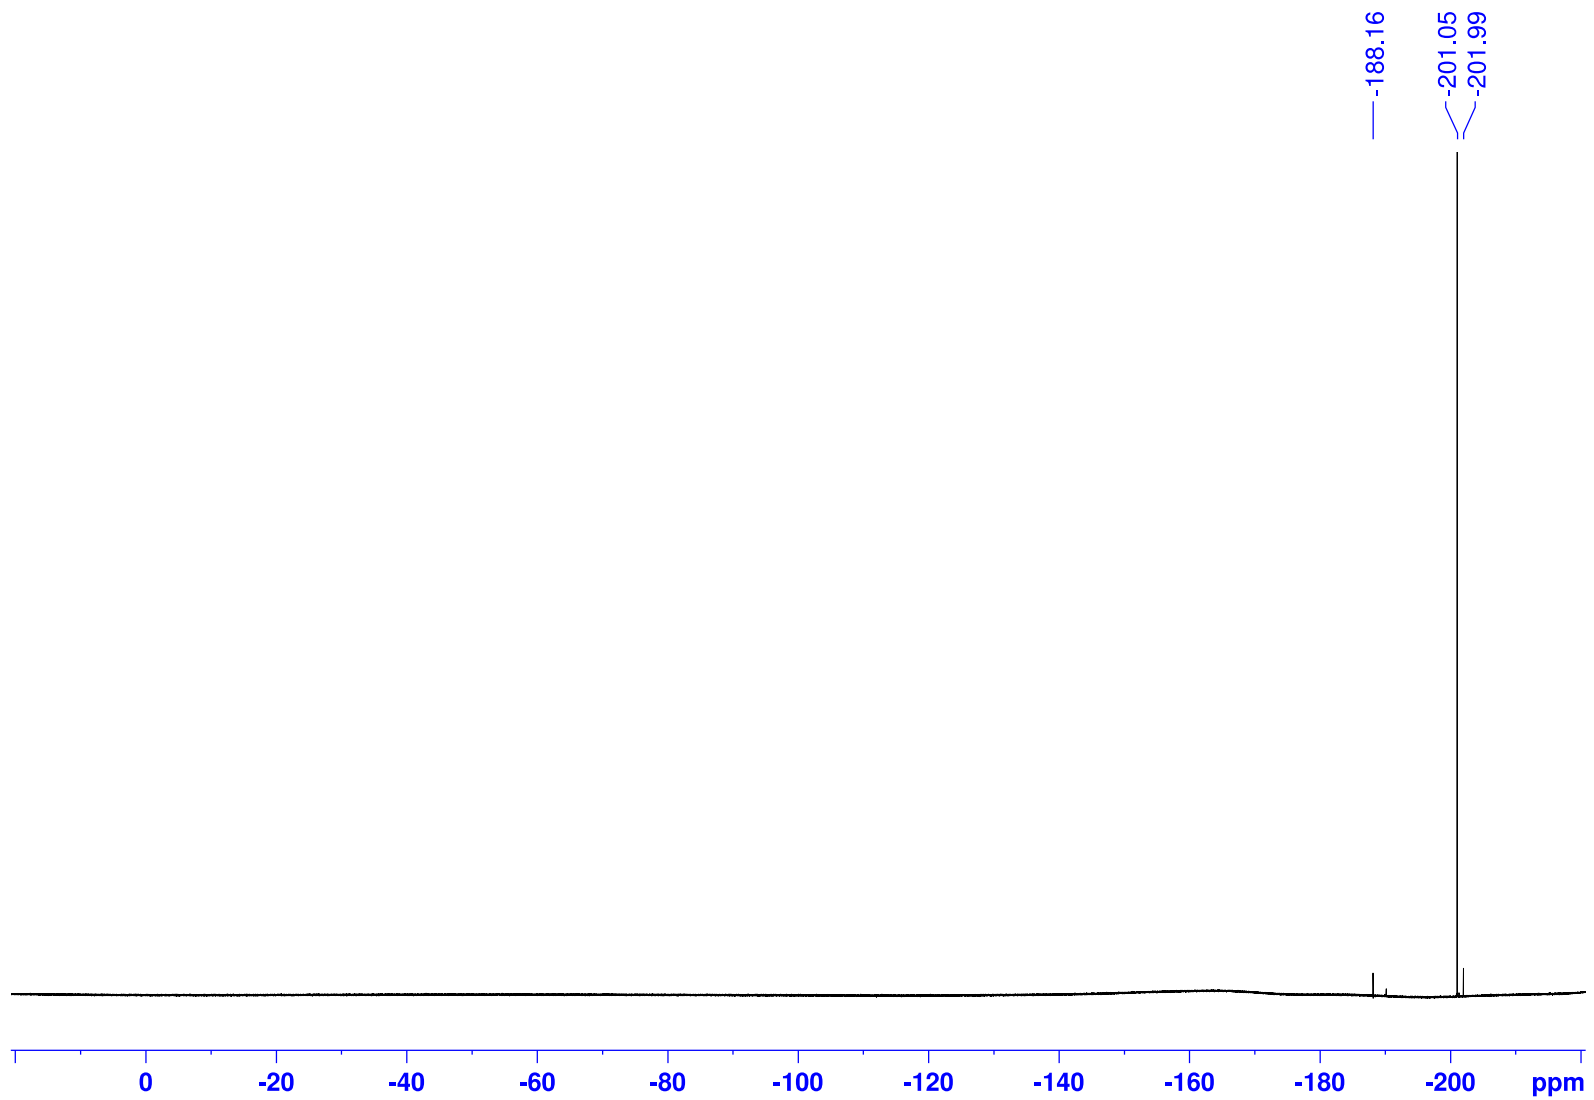

$^{19}\text{F}$  NMR spectrum of compound 20 (470 MHz,  $\text{CDCl}_3$ )

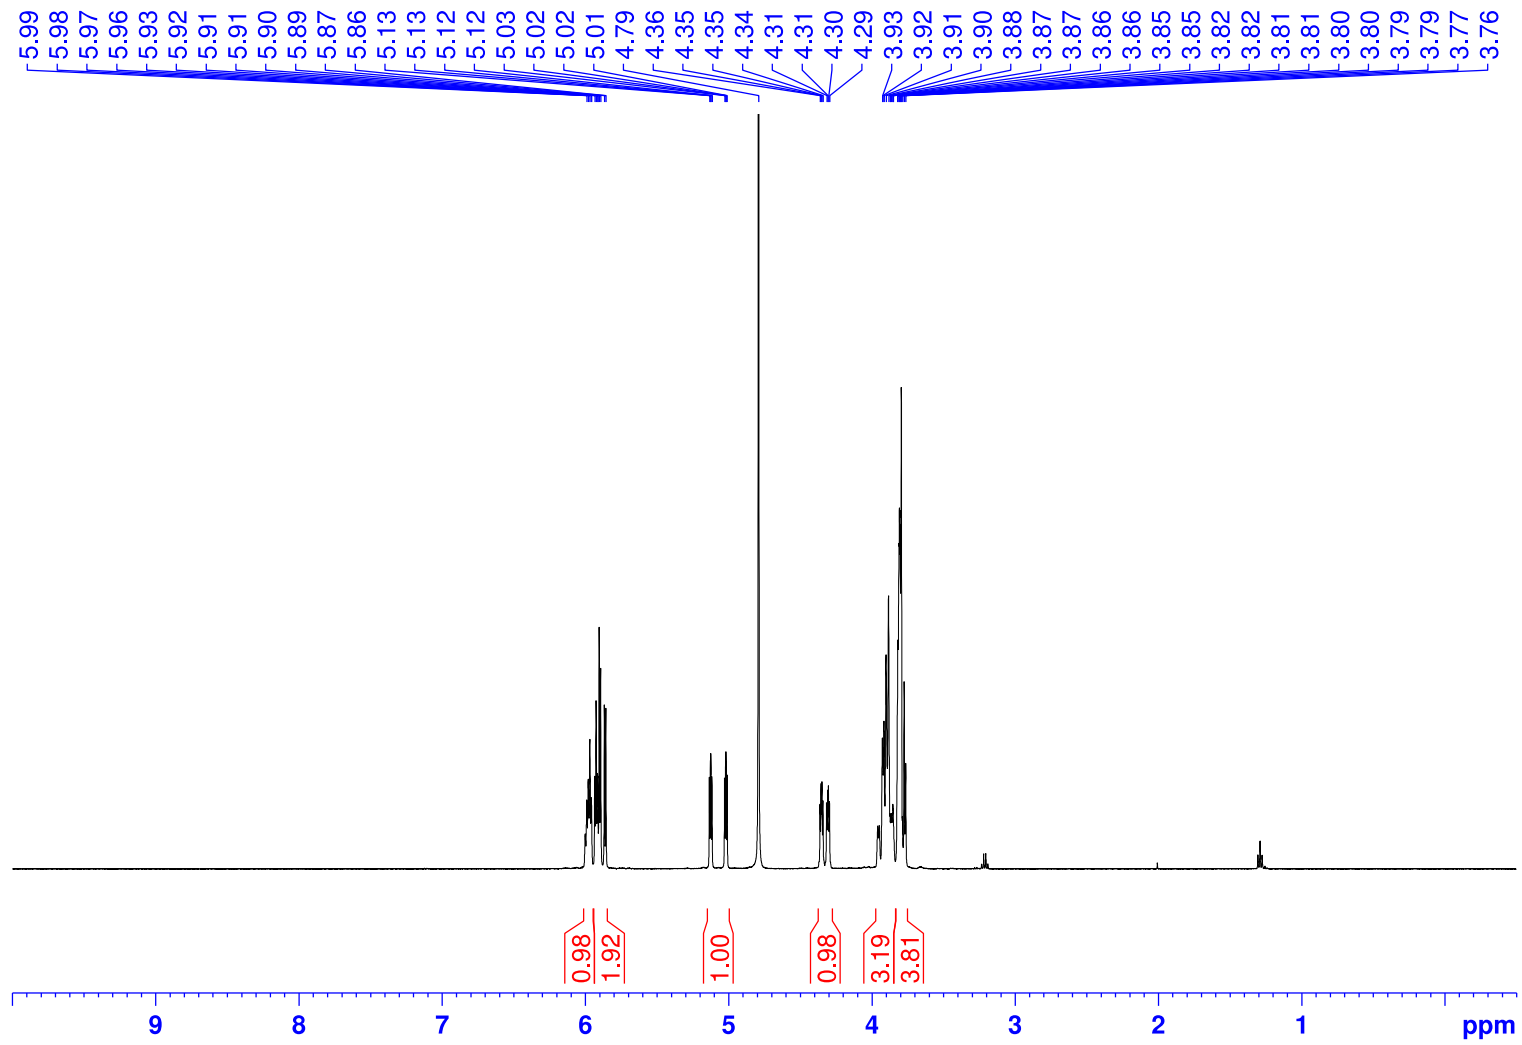

**<sup>1</sup>H NMR spectrum of compound 21 (500 MHz, D<sub>2</sub>O)**

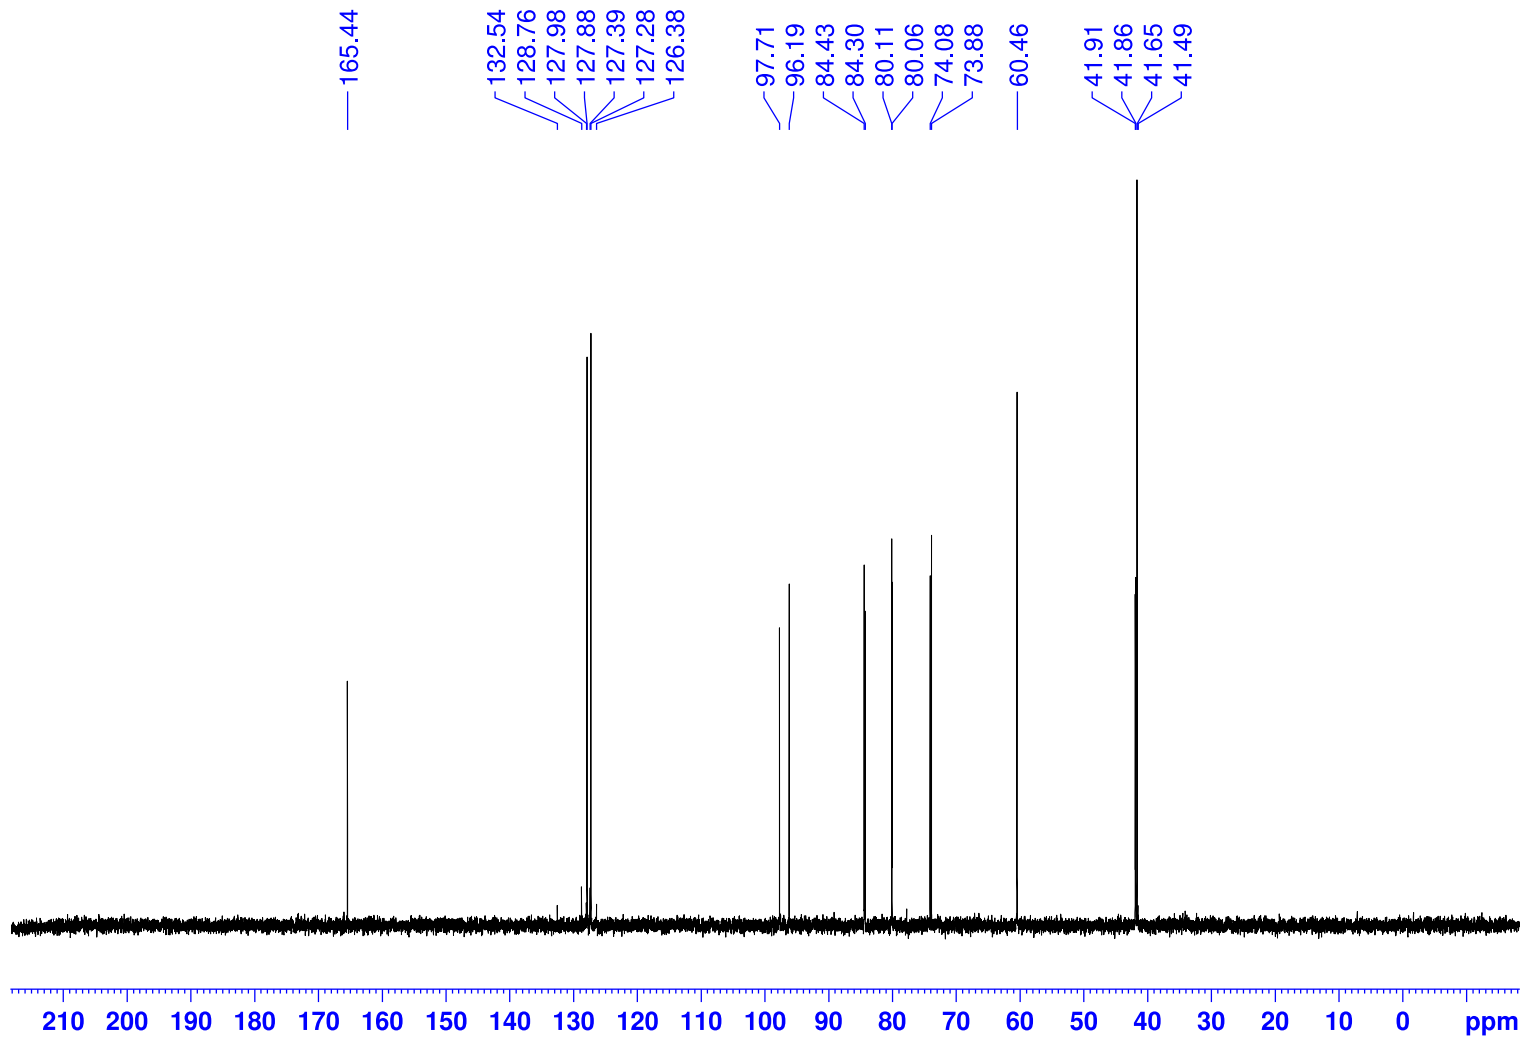

$^{13}\text{C}$  NMR spectrum of compound 21 (126 MHz,  $\text{D}_2\text{O}$ )

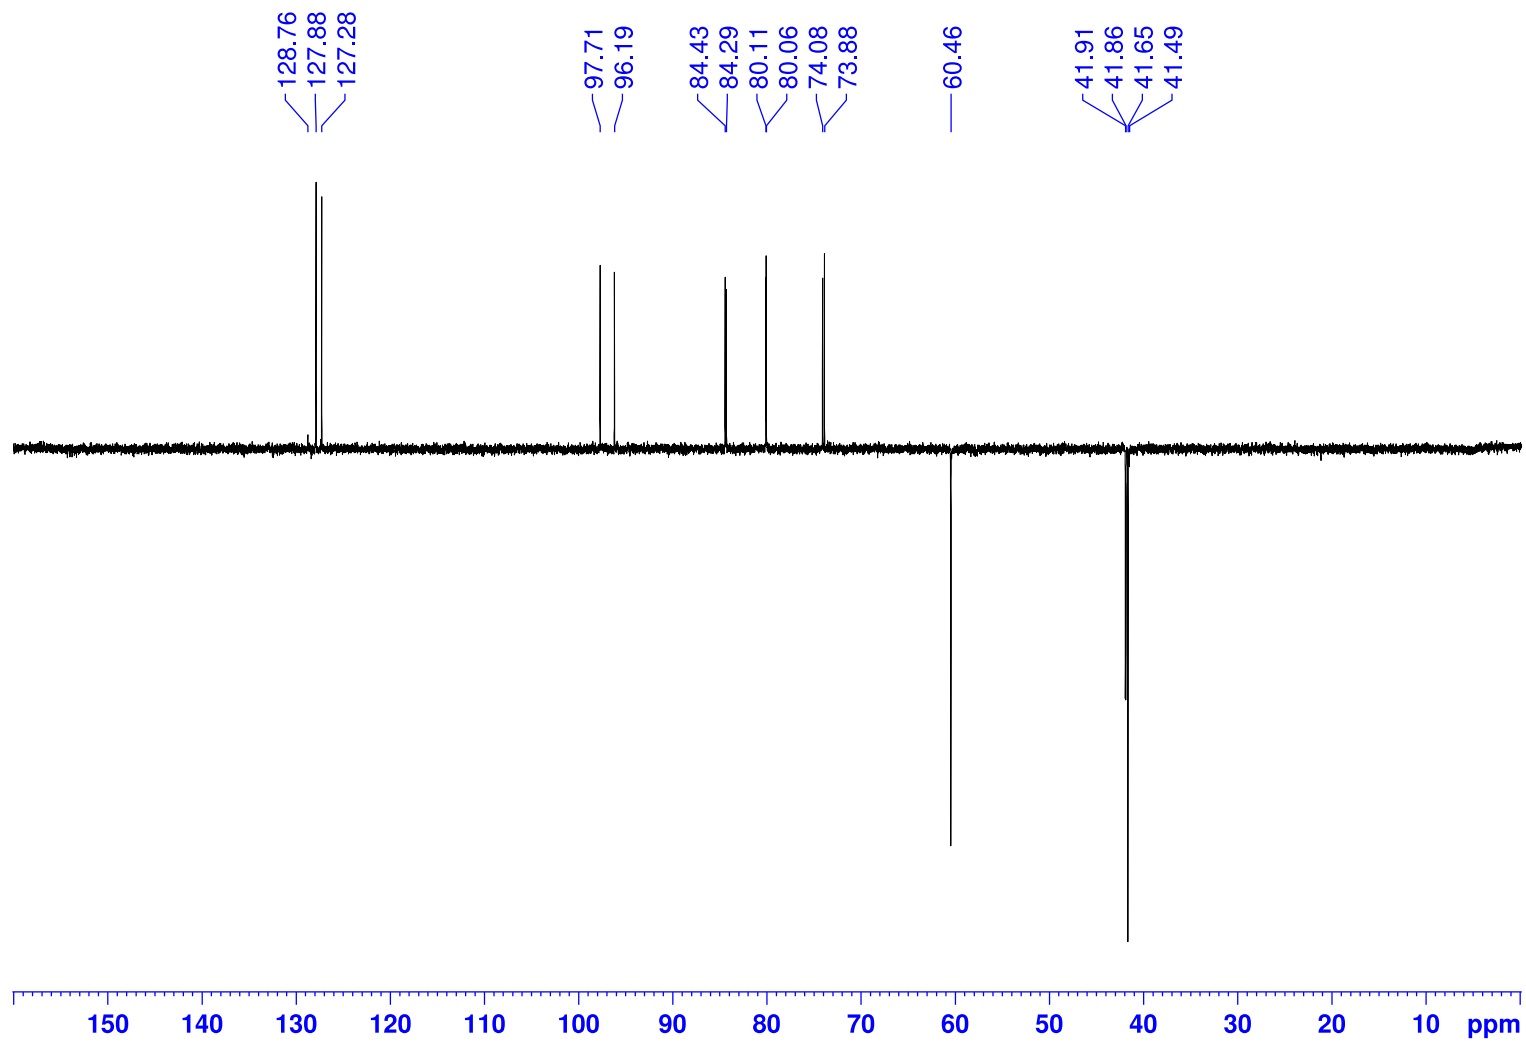

**$^{13}\text{C}$  DEPT-135 NMR spectrum of compound 21 (126 MHz,  $\text{D}_2\text{O}$ )**

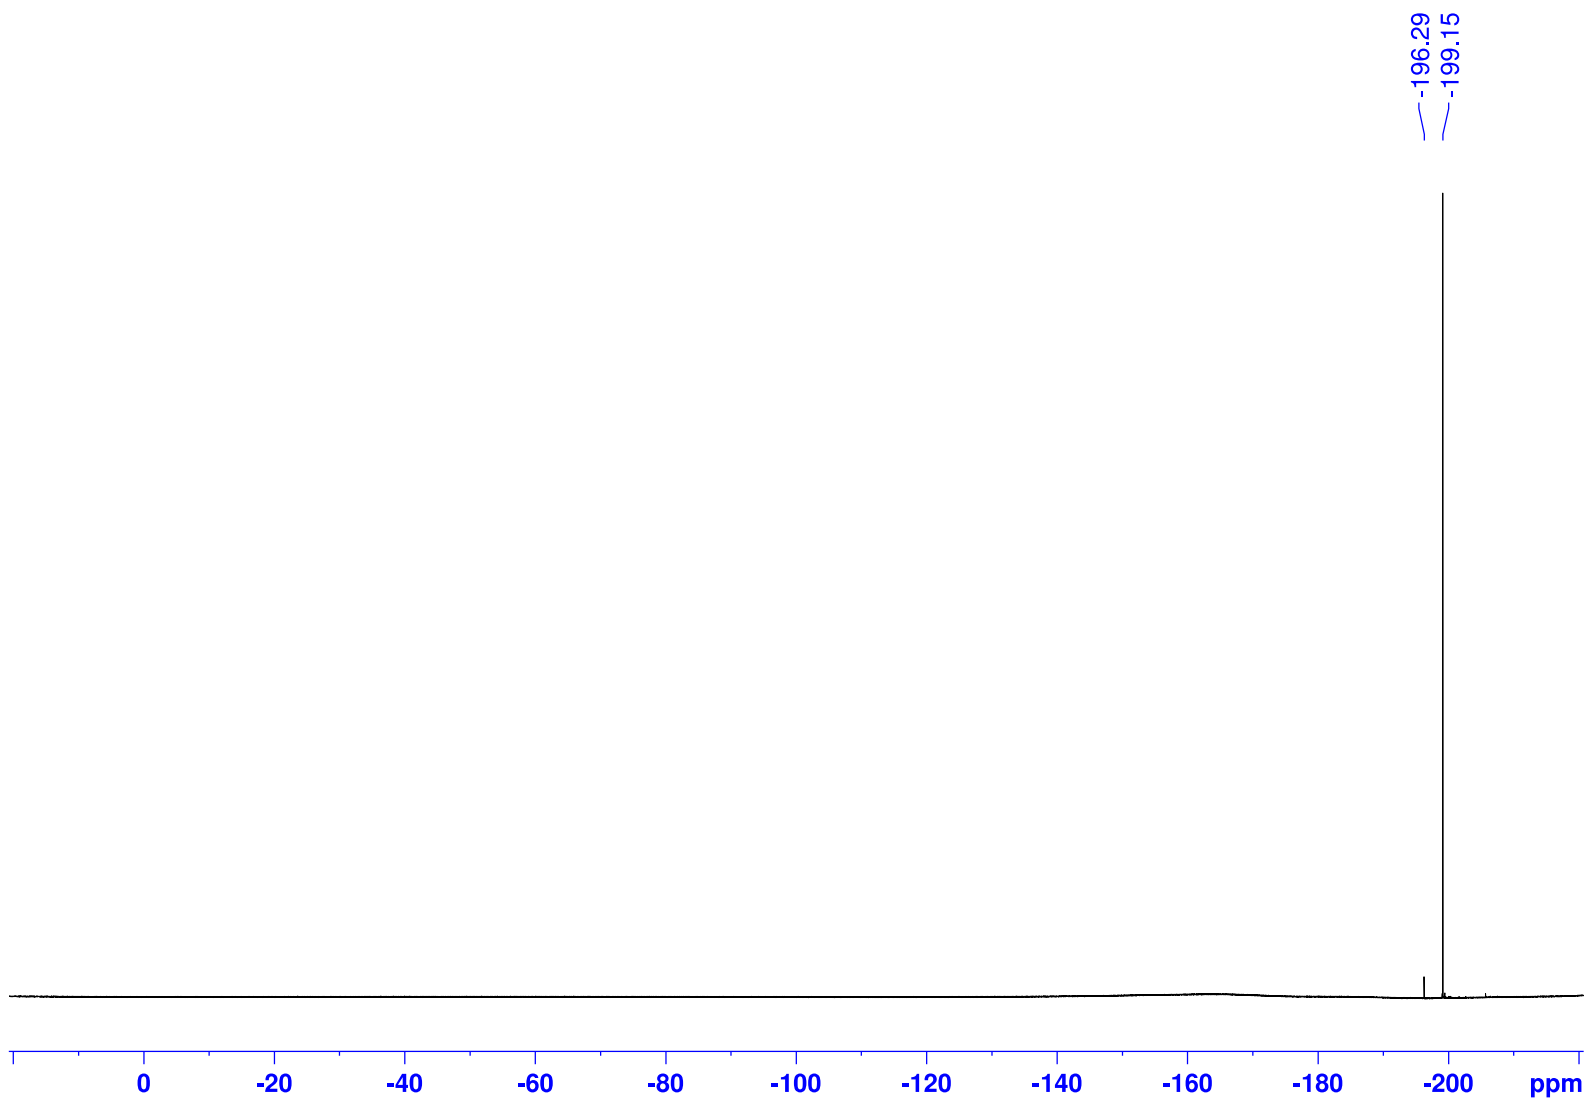

$^{19}\text{F}$  NMR spectrum of compound 21 (470 MHz,  $\text{D}_2\text{O}$ )

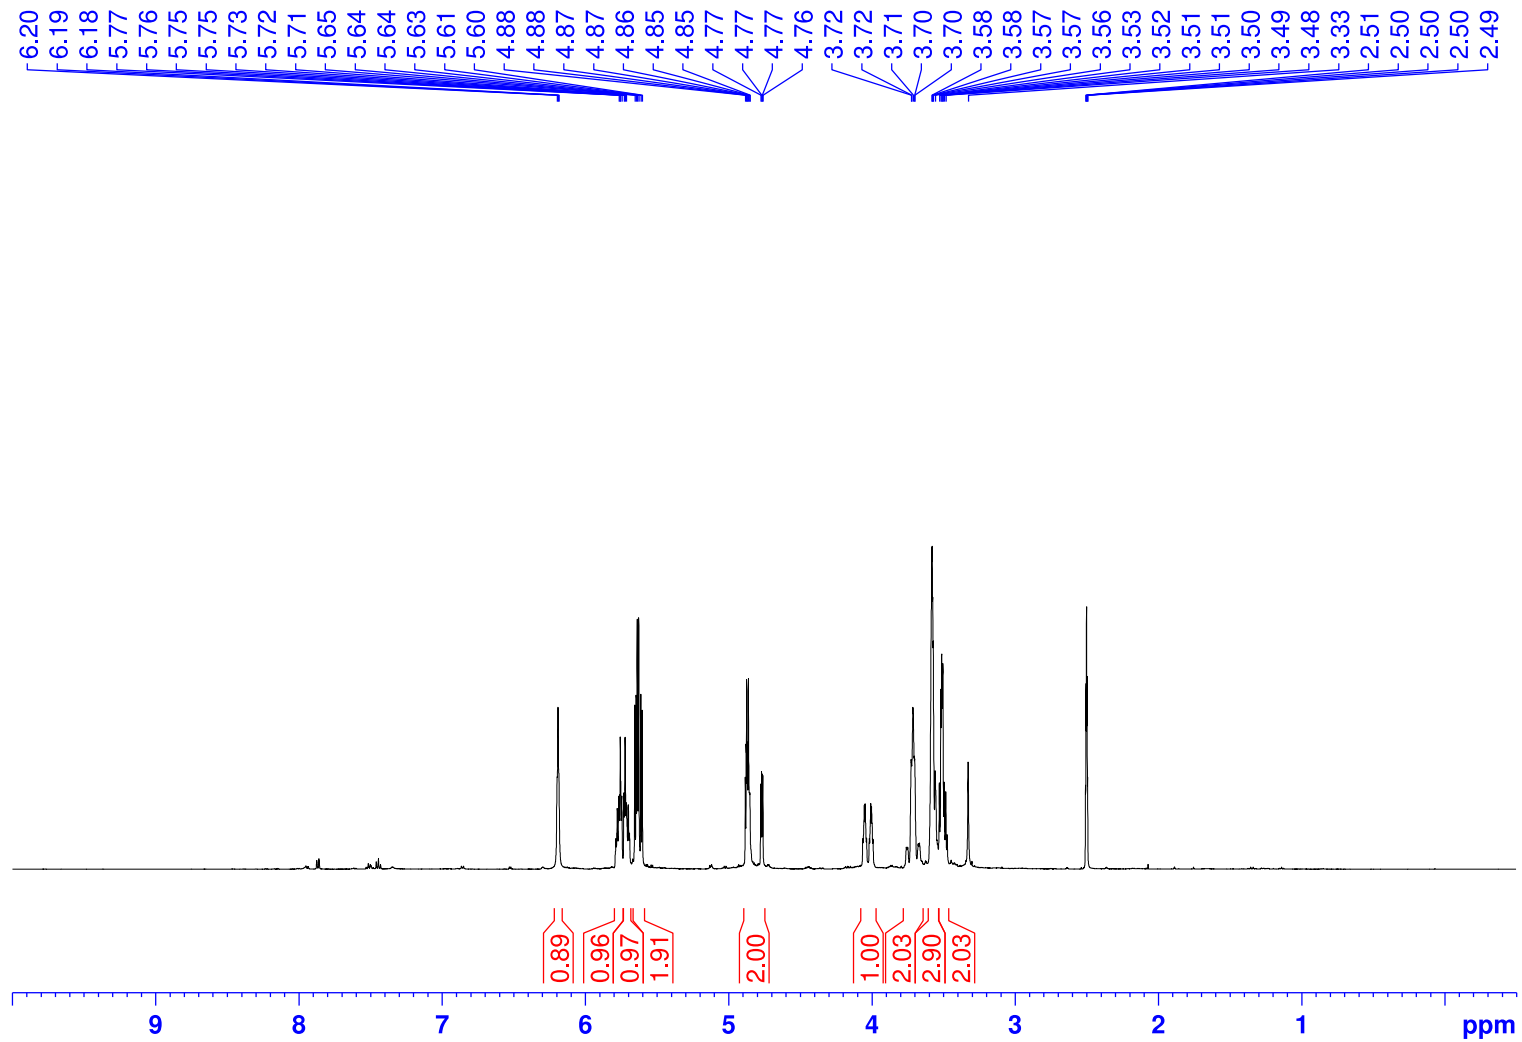

<sup>1</sup>H NMR spectrum of compound 21 (500 MHz, DMSO-d<sub>6</sub>)

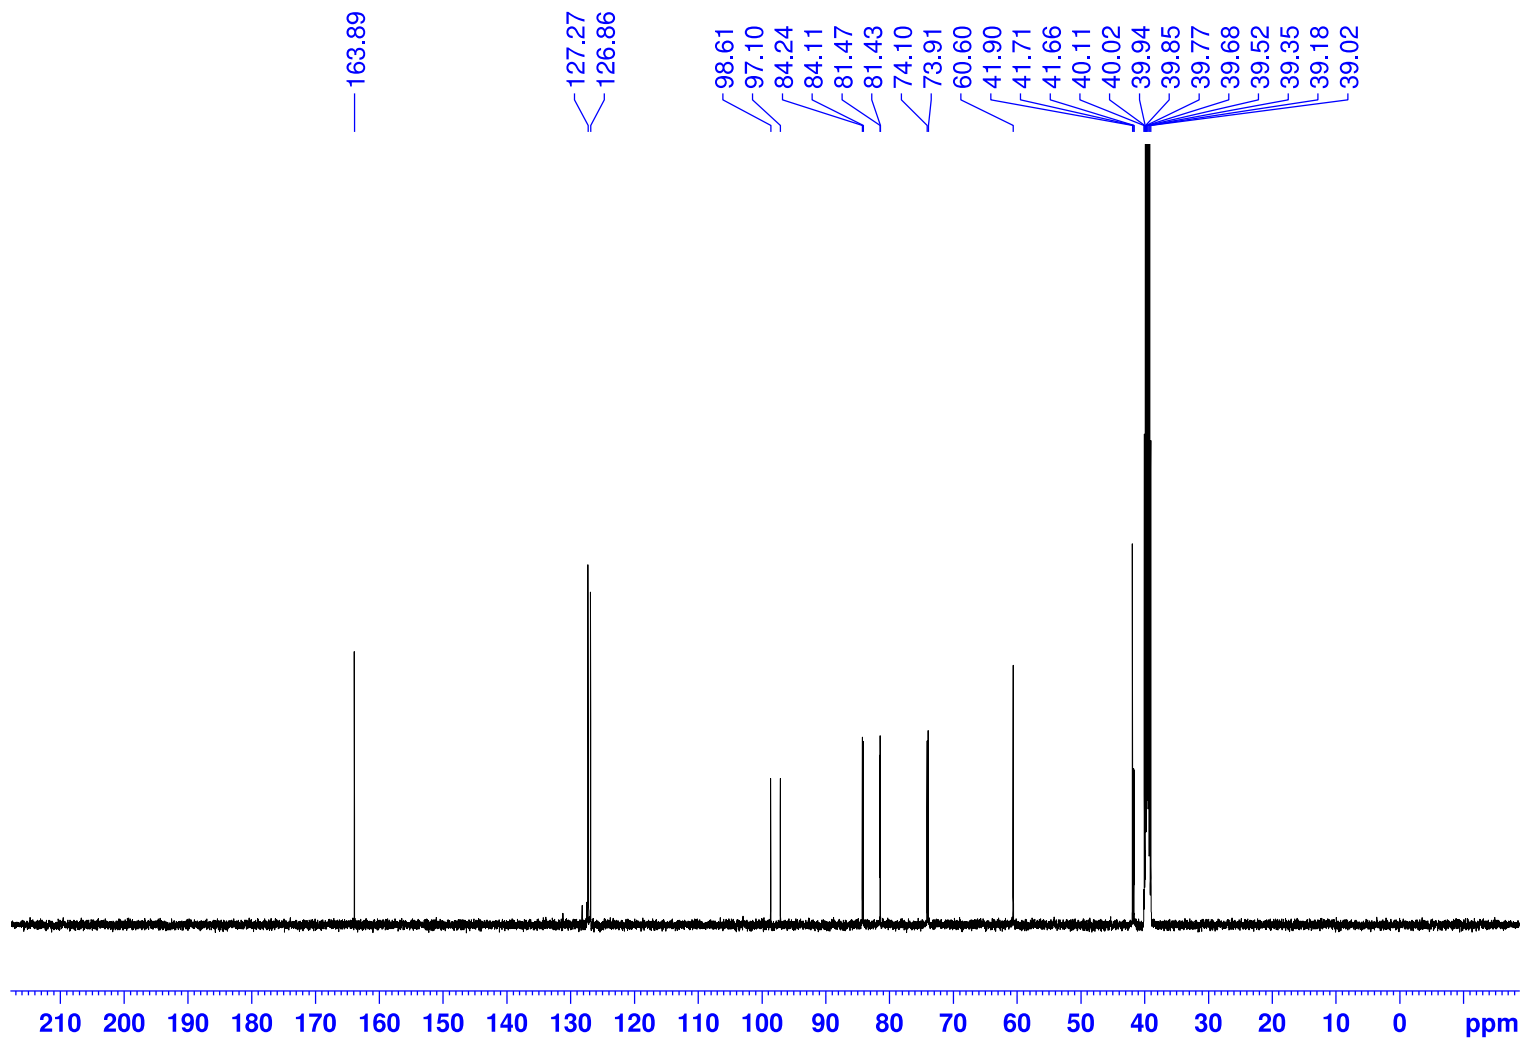

$^{13}\text{C}$  NMR spectrum of compound 21 (126 MHz, DMSO- $d_6$ )



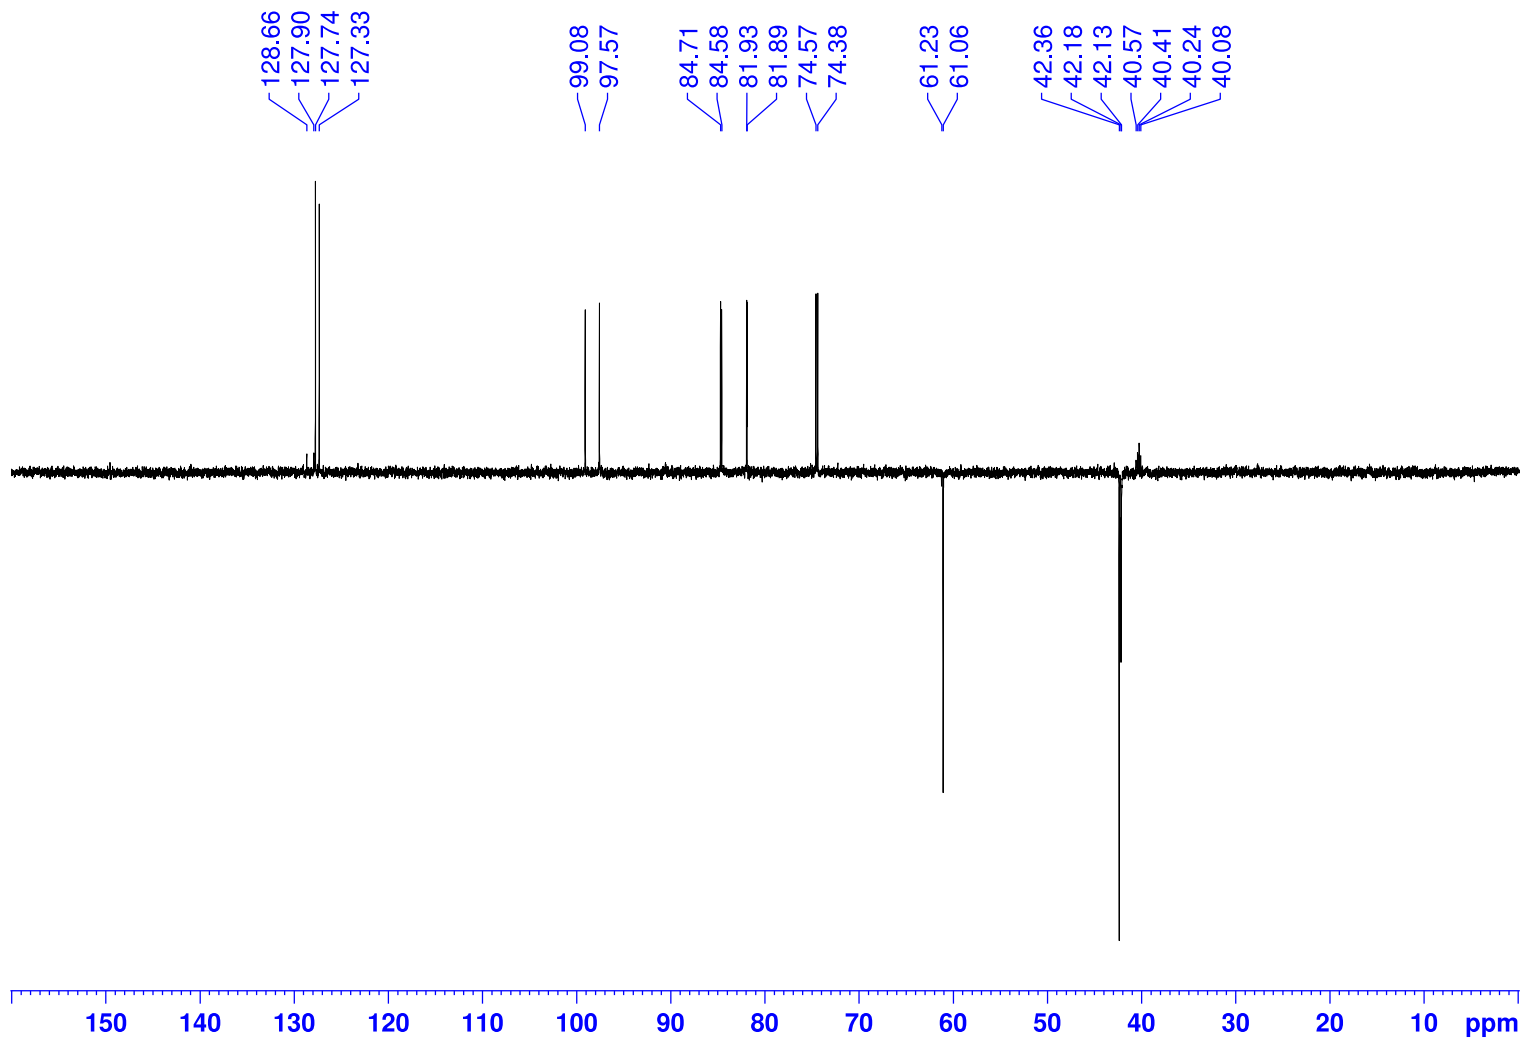

**$^{13}\text{C}$  DEPT-135 NMR spectrum of compound 21 (126 MHz,  $\text{DMSO-}d_6$ )**

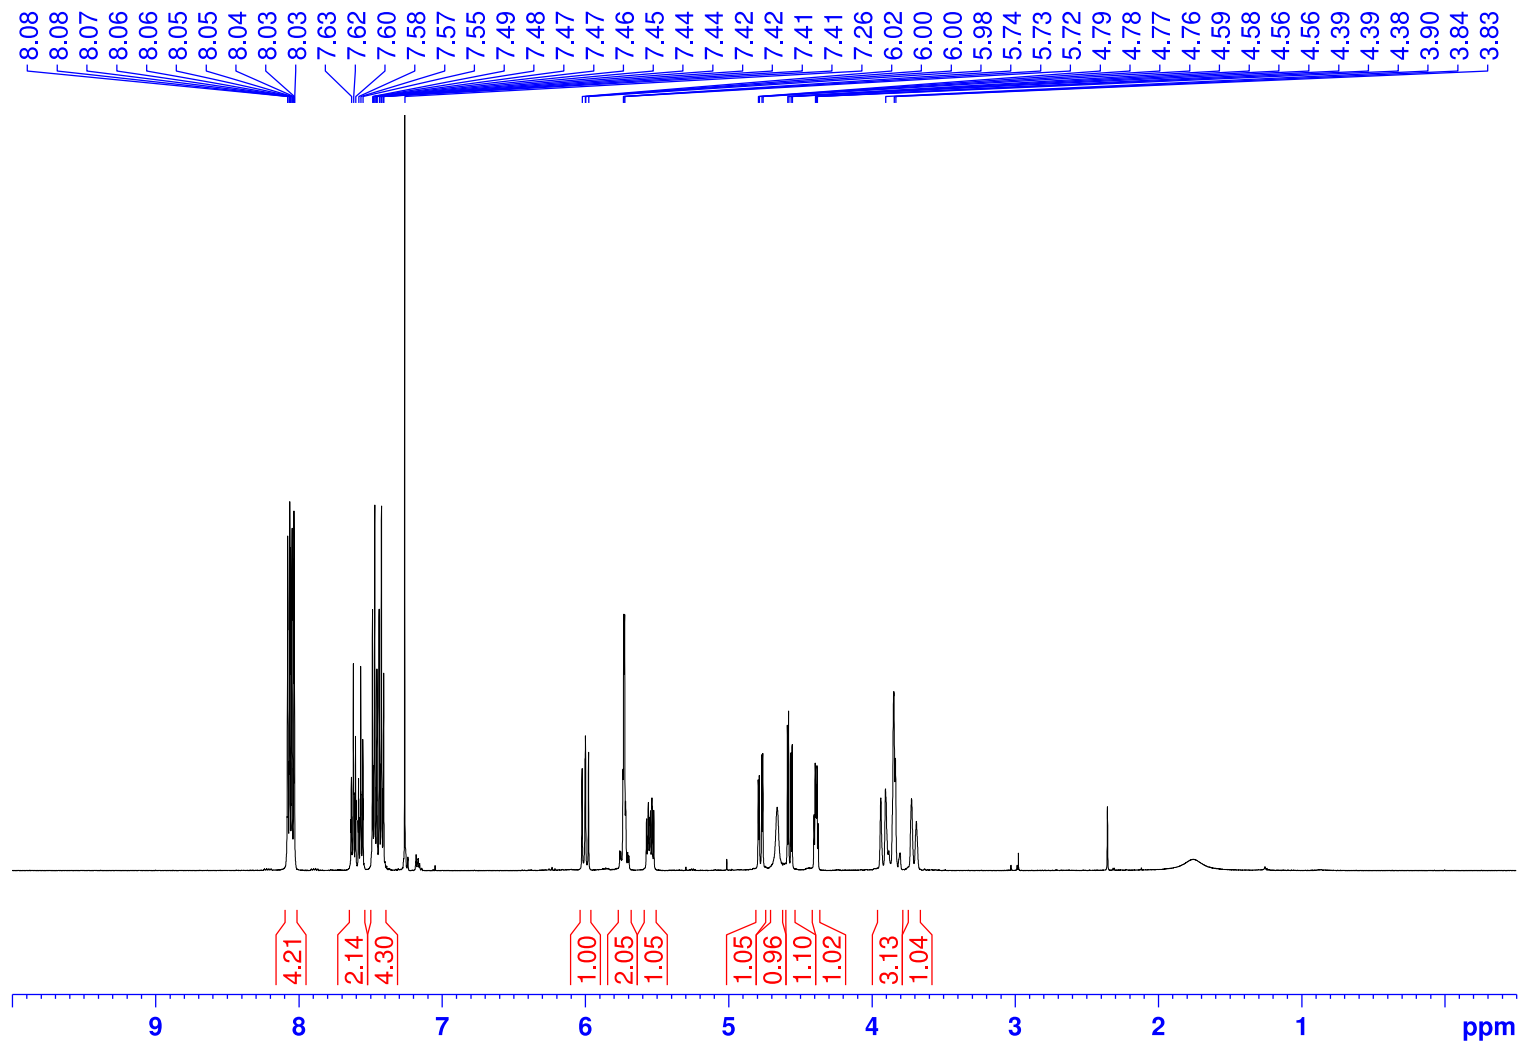

<sup>1</sup>H NMR spectrum of compound 23 (500 MHz, CDCl<sub>3</sub>)

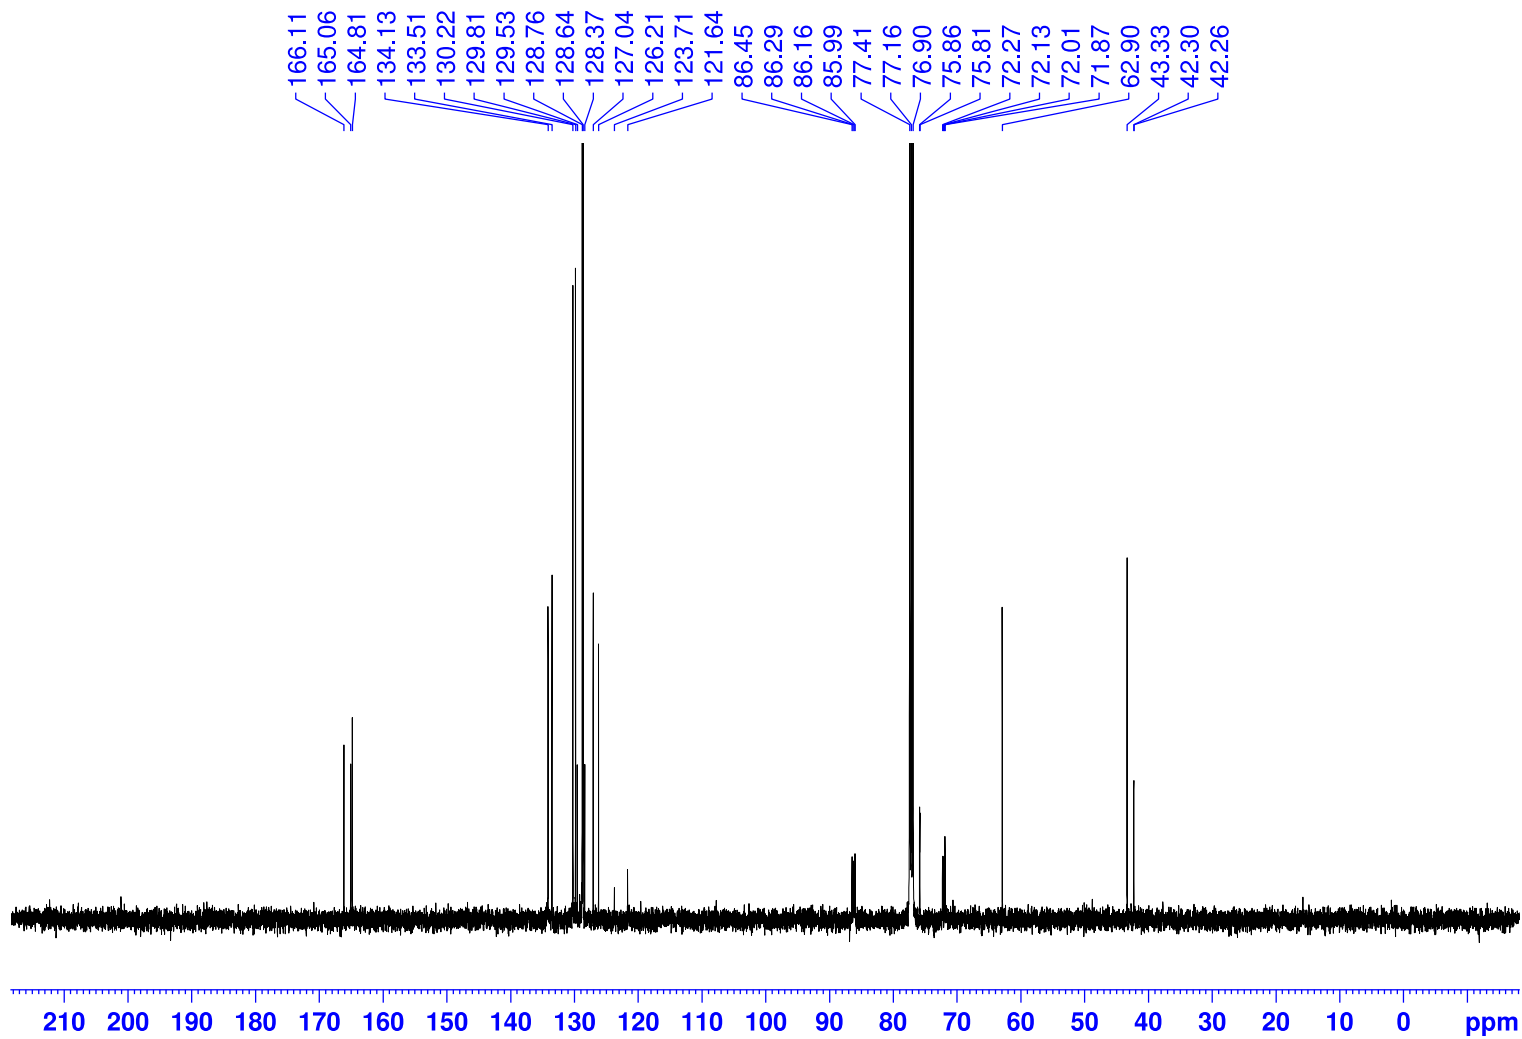

<sup>13</sup>C NMR spectrum of compound 23 (126 MHz, CDCl<sub>3</sub>)

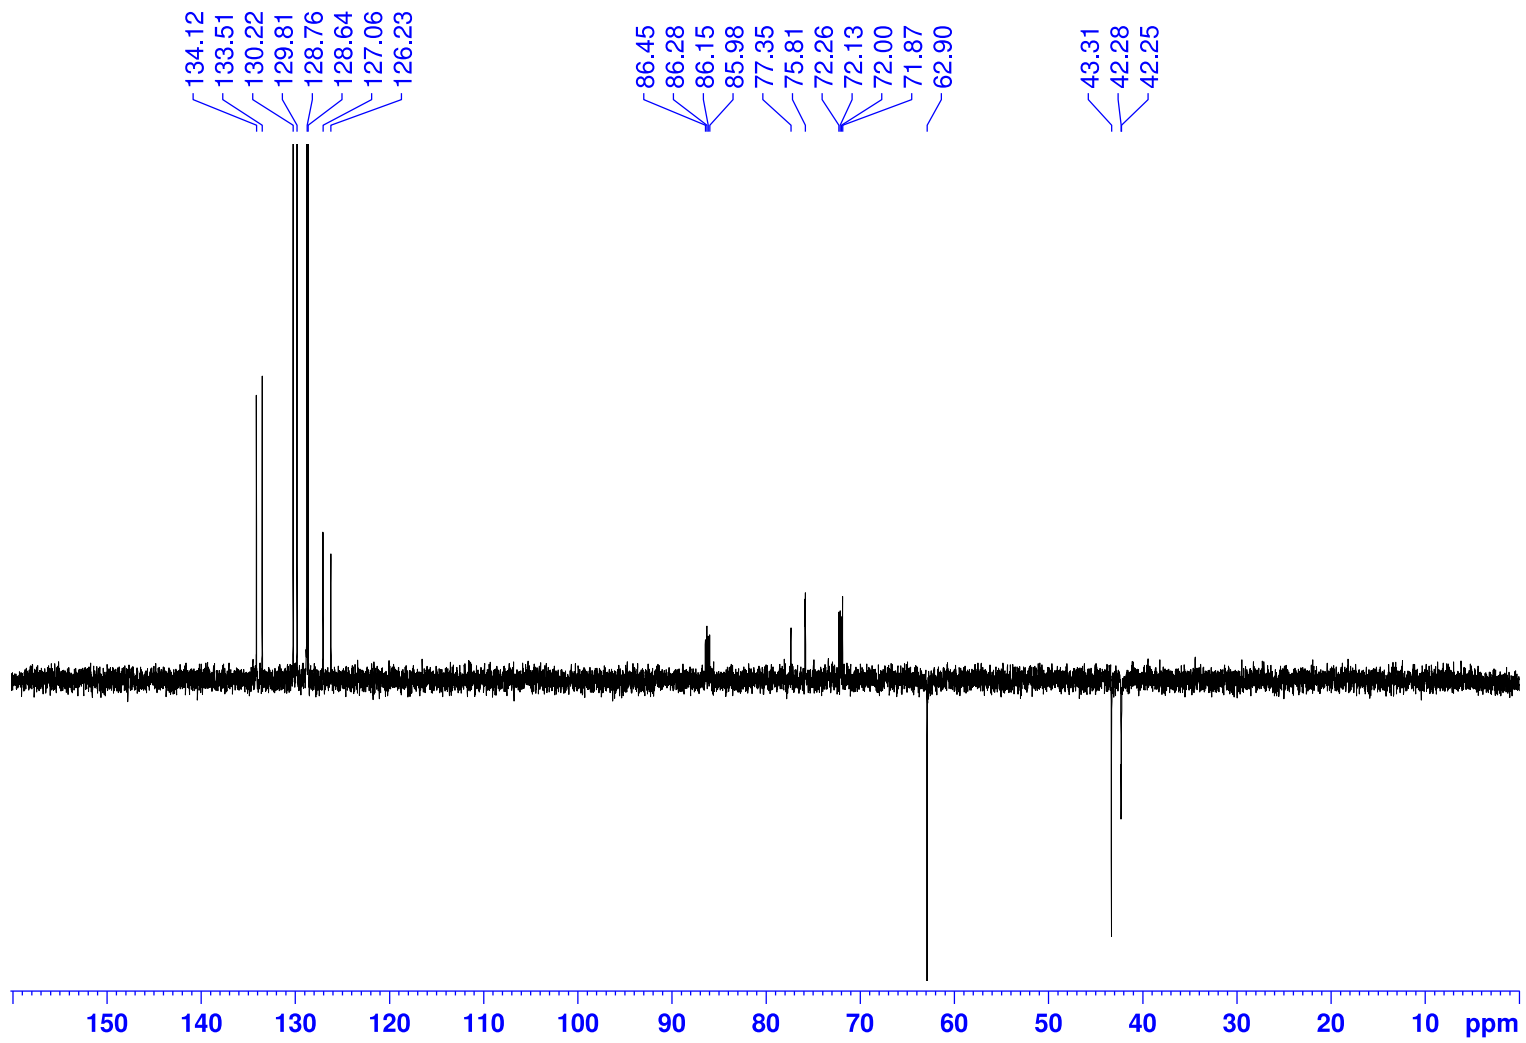

$^{13}\text{C}$  DEPT-135 NMR spectrum of compound 23 (126 MHz,  $\text{CDCl}_3$ )

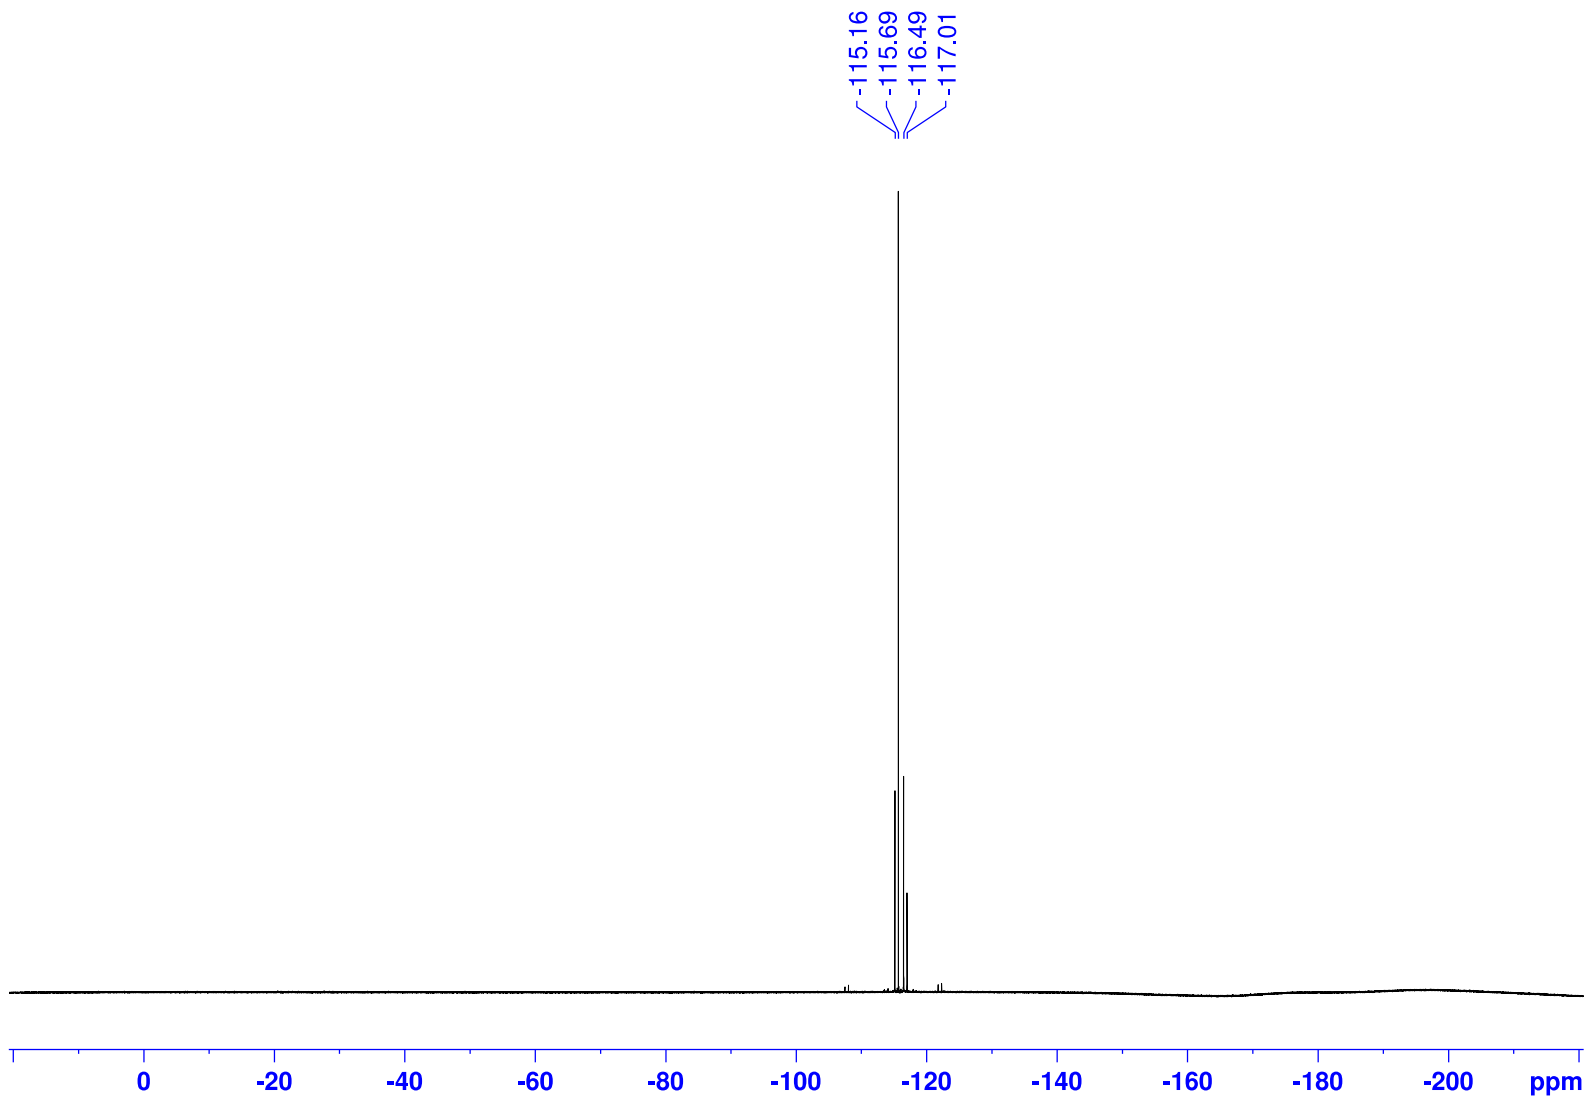

$^{19}\text{F}$  NMR spectrum of compound 23 (470 MHz,  $\text{CDCl}_3$ )

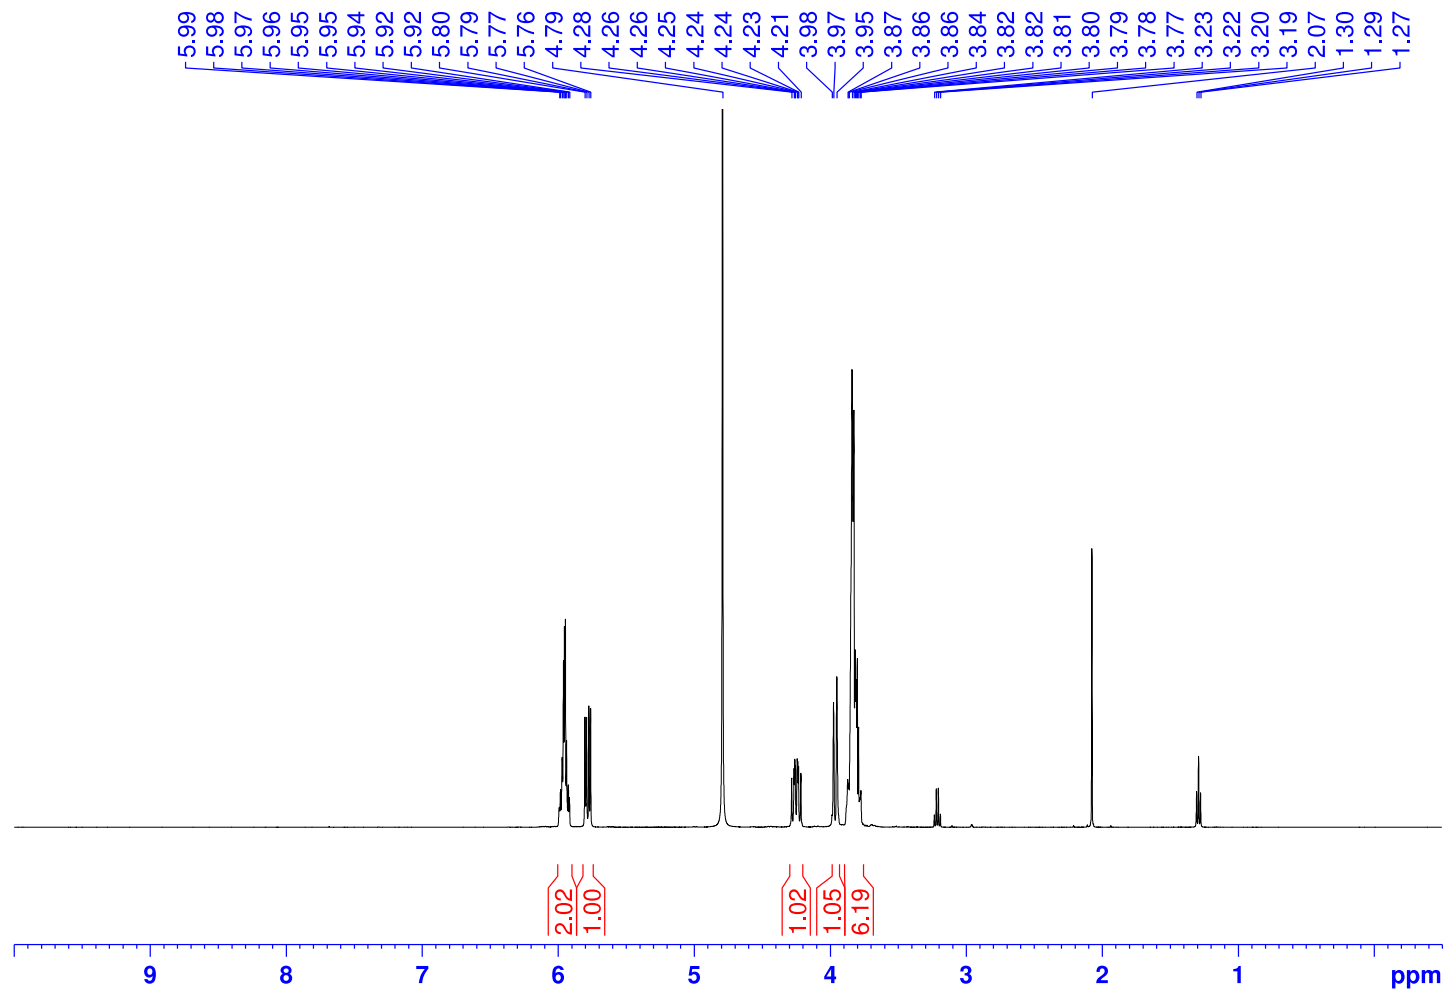

<sup>1</sup>H NMR spectrum of compound 25 (500 MHz, D<sub>2</sub>O)

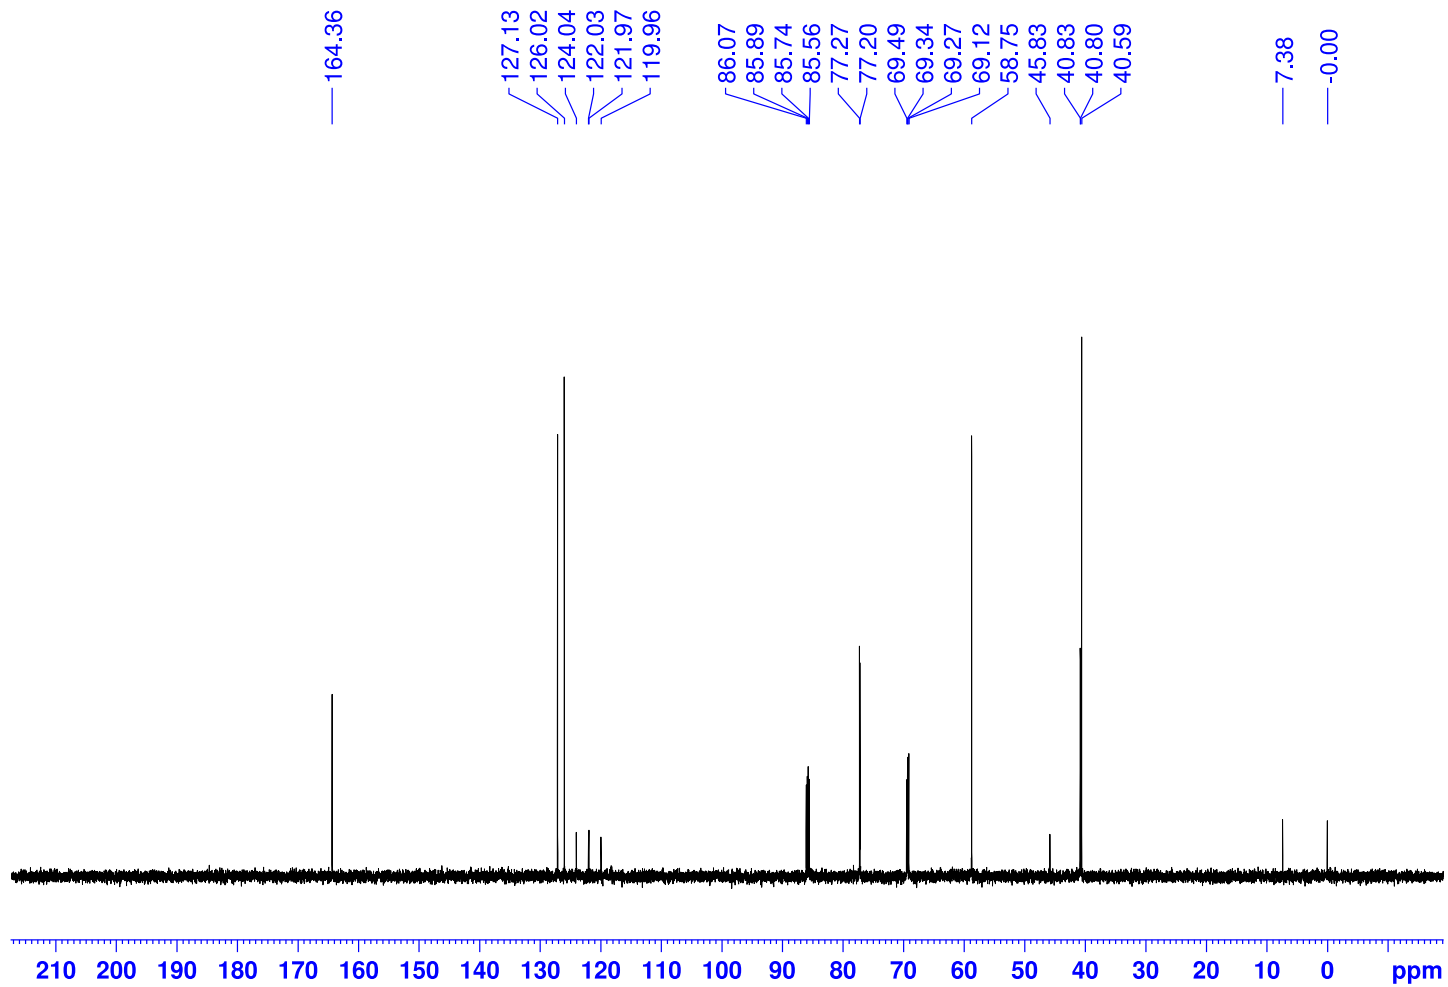

$^{13}\text{C}$  NMR spectrum of compound 25 (126 MHz,  $\text{D}_2\text{O}$ )

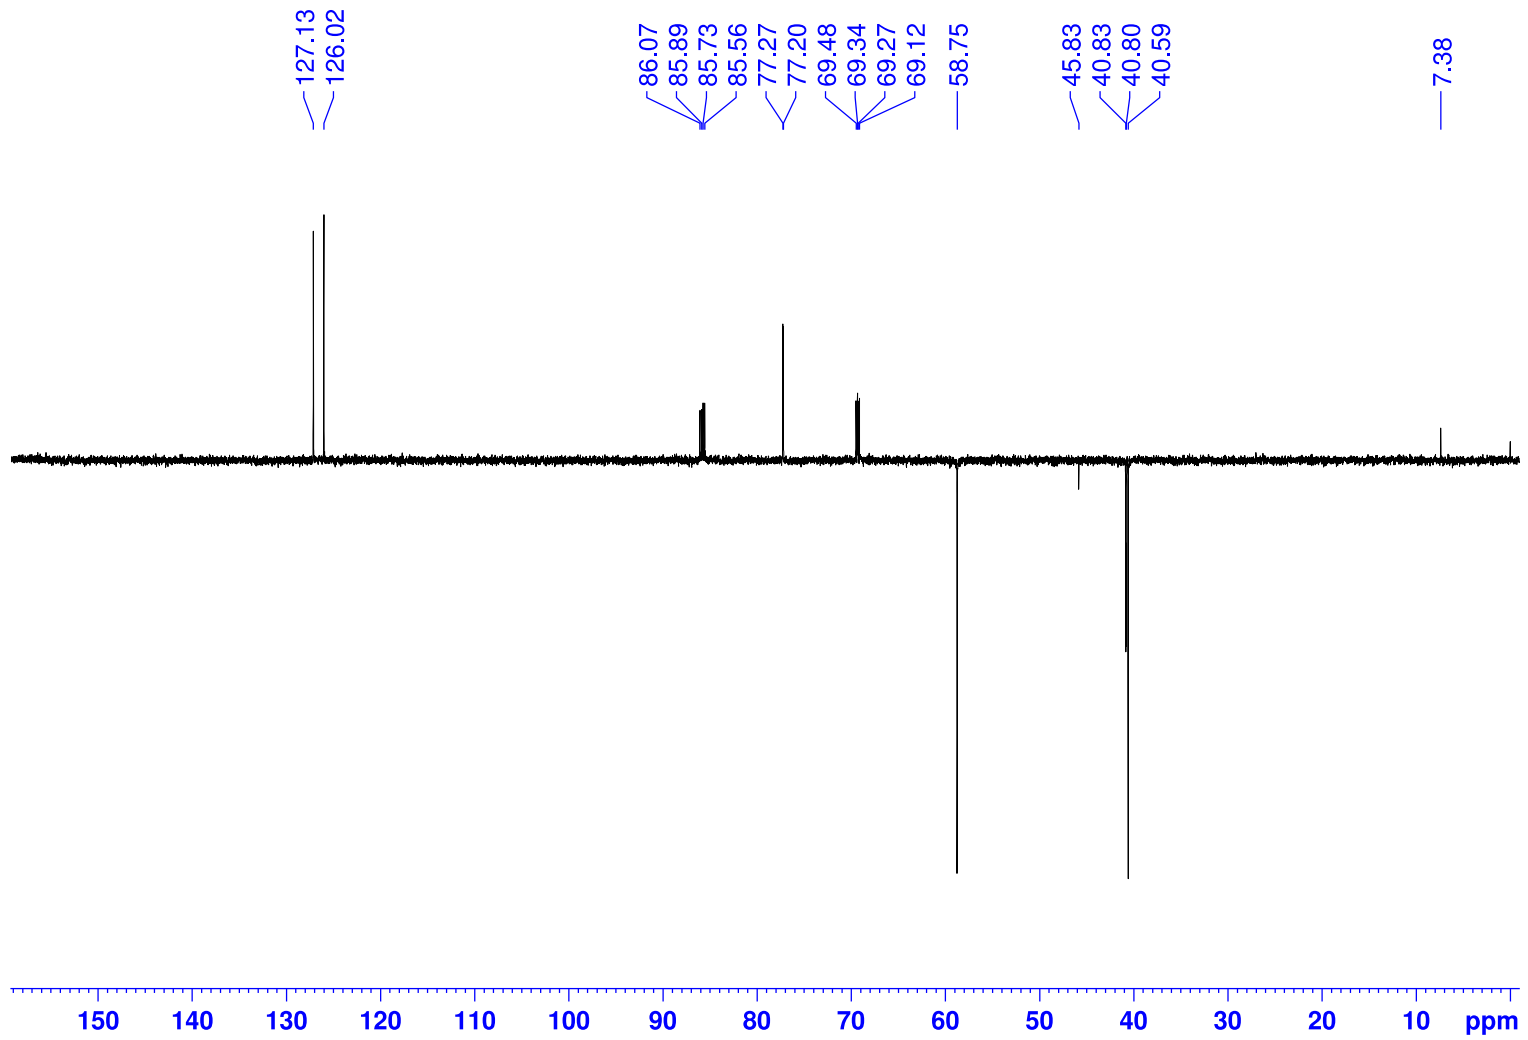

$^{13}\text{C}$  DEPT-135 NMR spectrum of compound 25 (126 MHz,  $\text{D}_2\text{O}$ )



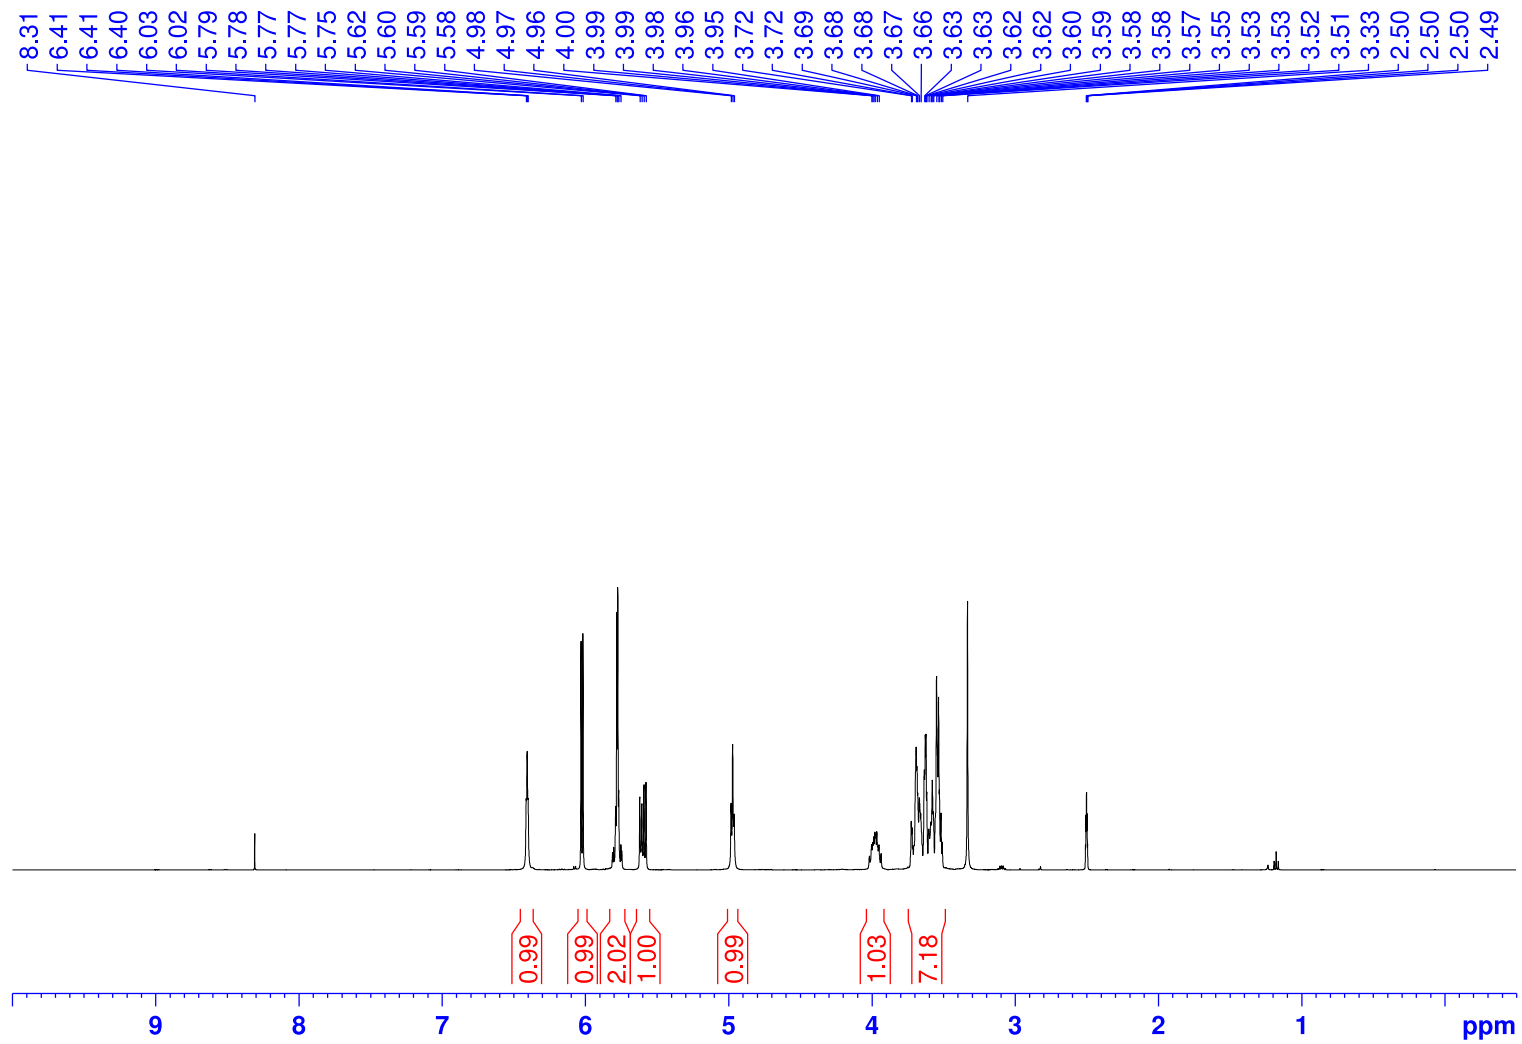

<sup>1</sup>H NMR spectrum of compound 25 (500 MHz, DMSO-d<sub>6</sub>)

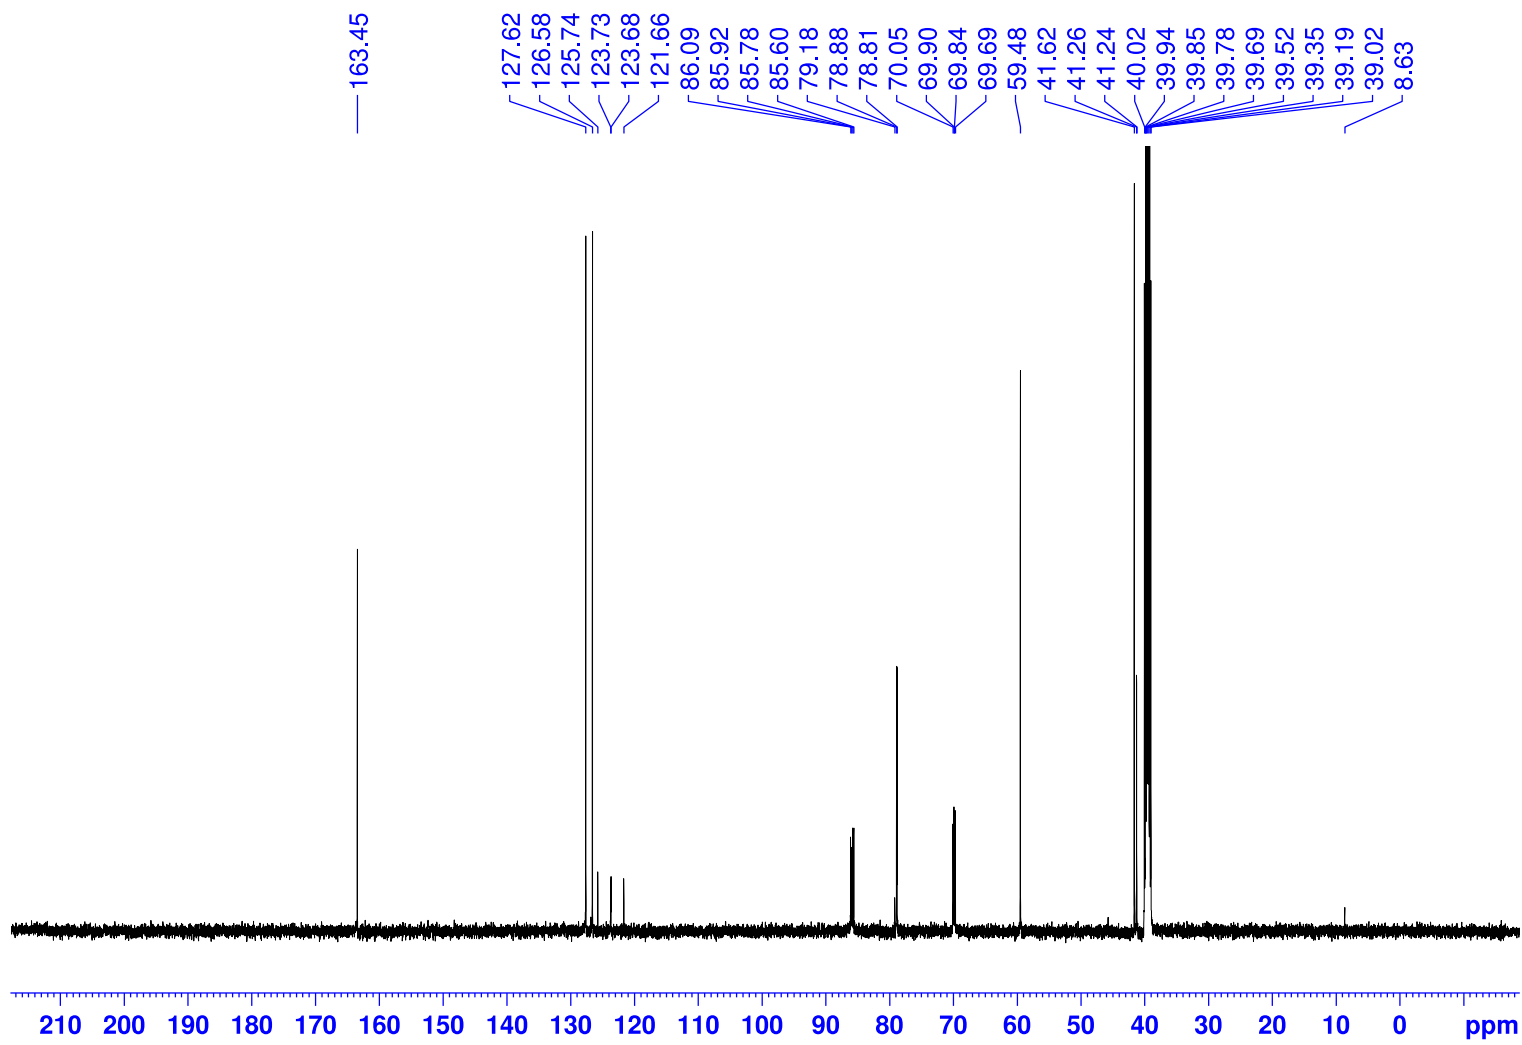

<sup>13</sup>C NMR spectrum of compound 25 (126 MHz, DMSO-*d*<sub>6</sub>)

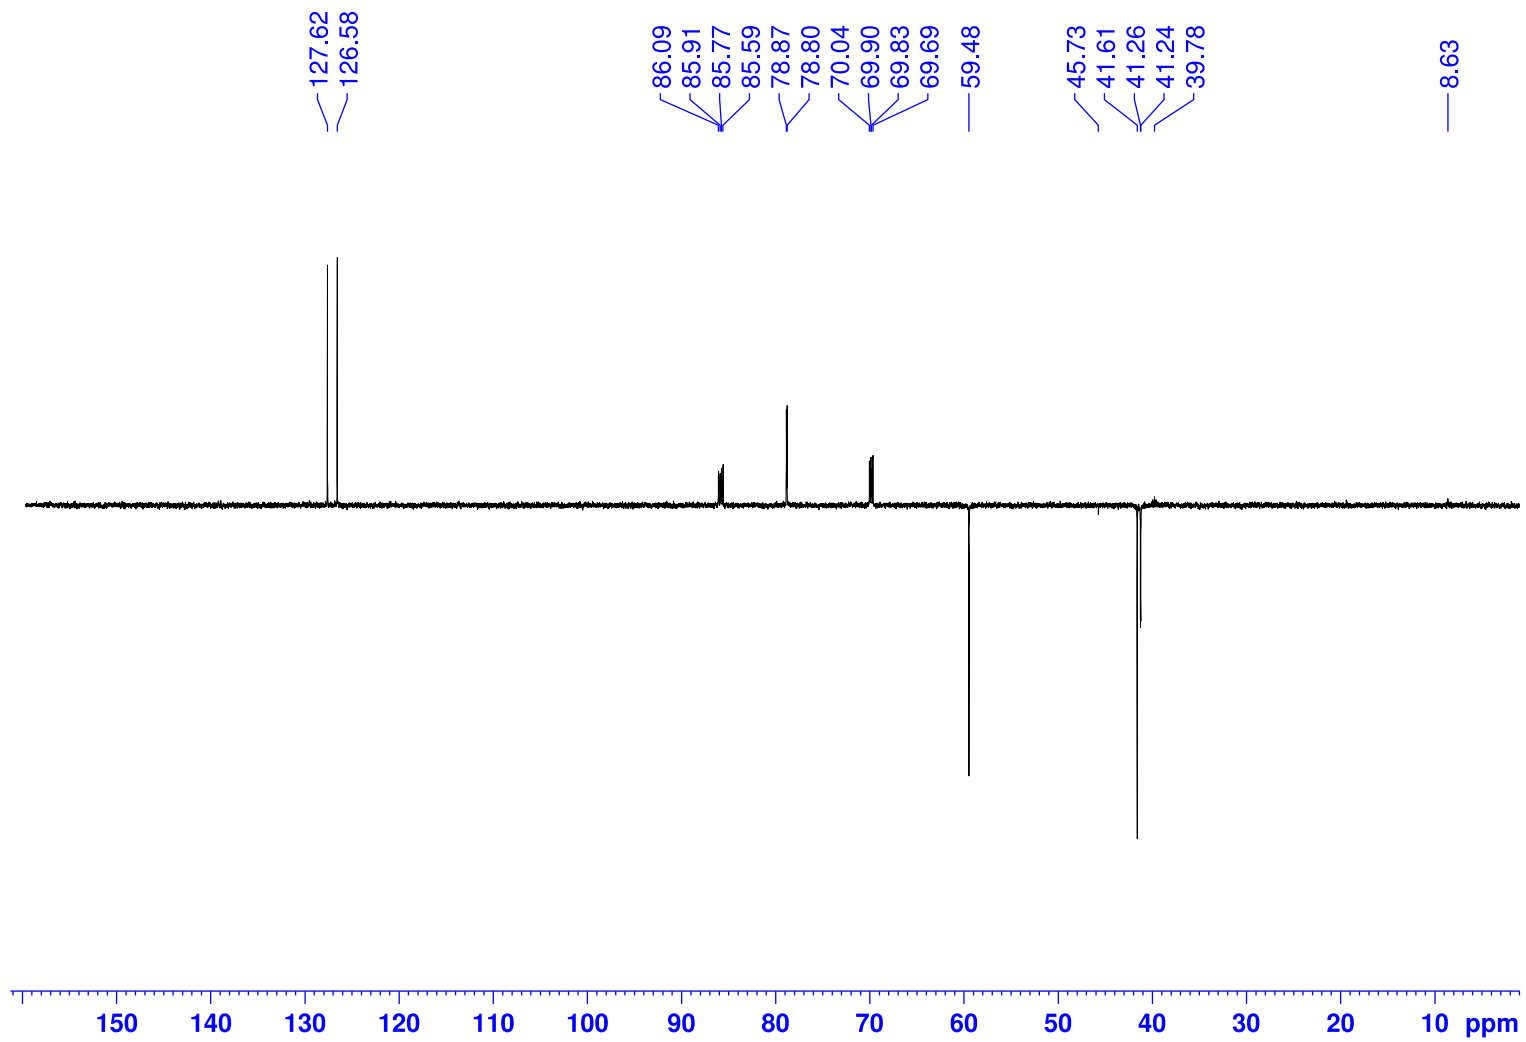

$^{13}\text{C}$  DEPT-135 NMR spectrum of compound 25 (126 MHz,  $\text{DMSO-}d_6$ )

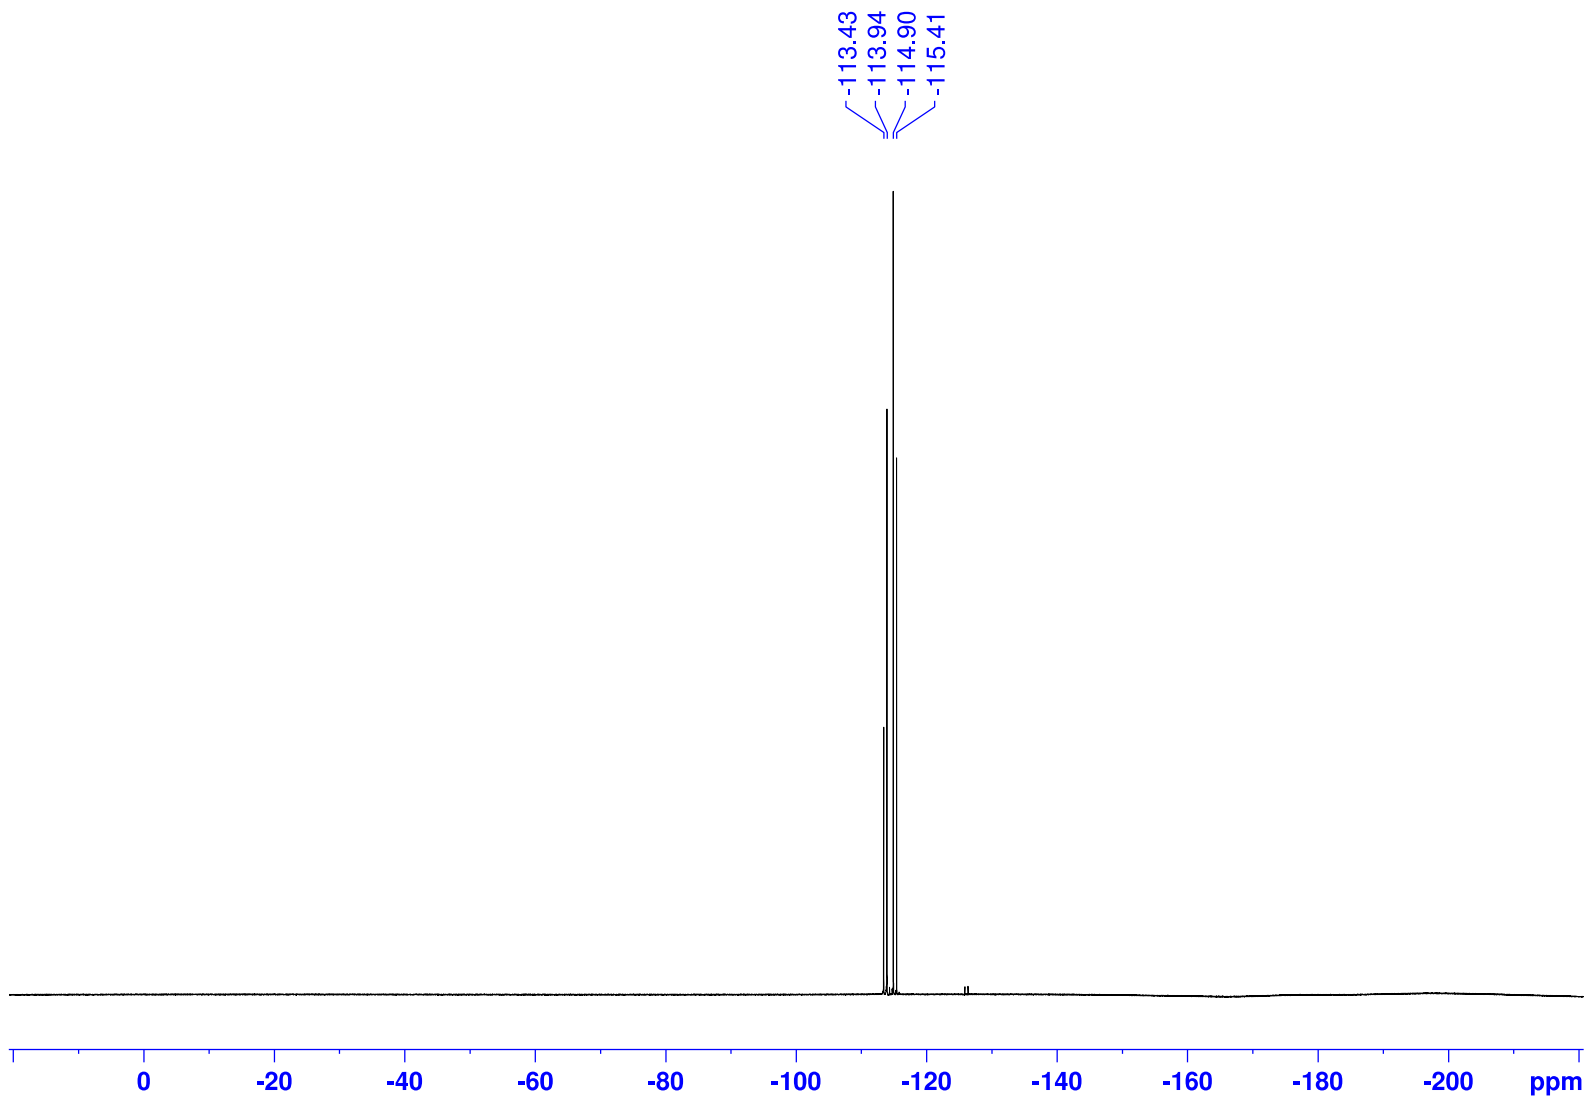

$^{19}\text{F}$  NMR spectrum of compound 25 (470 MHz,  $\text{DMSO}-d_6$ )
